# Supplementary material
Source: PubMed Central journal article supplement (PMC2942783)

Supporting Information  
“Fragmentation of chloroperoxides: hypochlorite-mediated dehydration of  
hydroperoxyacetals to esters”

Fisher, T. J. and Dussault, Patrick H.

<sup>1</sup>H NMR and <sup>13</sup>C NMR spectra

|                                                                              | Page |
|------------------------------------------------------------------------------|------|
| 1-Methoxynonyl hydroperoxide 1H ( <b>1a</b> )                                | 3    |
| 1-Methoxynonyl hydroperoxide 13C ( <b>1a</b> )                               | 4    |
| 1-Ethoxynonyl hydroperoxide 1H ( <b>1b</b> )                                 | 5    |
| 1-Ethoxynonyl hydroperoxide 13C ( <b>1b</b> )                                | 6    |
| 1-Isopropoxynonyl hydroperoxide 1H ( <b>1c</b> )                             | 7    |
| 1-Isopropoxynonyl hydroperoxide 13C ( <b>1c</b> )                            | 8    |
| 1-(2-Hydroxyethoxy)nonyl hydroperoxide 1H ( <b>1d</b> )                      | 9    |
| 1-(2-Hydroxyethoxy)nonyl hydroperoxide 13C ( <b>1d</b> )                     | 10   |
| 9-Hydroperoxy-9-methoxynonyl acetate 1H ( <b>1e</b> )                        | 11   |
| 9-Hydroperoxy-9-methoxynonyl acetate 13C NMR ( <b>1e</b> )                   | 12   |
| 4-Benzyloxy-1-methoxybutyl hydroperoxide 1H NMR ( <b>1f</b> )                | 13   |
| 4-Benzyloxy-1-methoxybutyl hydroperoxide 13C ( <b>1f</b> )                   | 14   |
| 1-Methoxy-3-phenylpropyl hydroperoxide 1H NMR ( <b>1g</b> )                  | 15   |
| 1-Methoxy-3-phenylpropyl hydroperoxide 13C NMR ( <b>1g</b> )                 | 16   |
| 1-(2-Chloroethoxy)nonyl hydroperoxide 1H ( <b>1h</b> )                       | 17   |
| 1-(2-Chloroethoxy)nonyl hydroperoxide 13C ( <b>1h</b> )                      | 18   |
| 1,1-Dimethyl-tert-butyl-(1'-methoxynonyldioxy)silane 1H ( <b>1i</b> )        | 19   |
| 1,1-Dimethyl-tert-butyl-(1'-methoxynonyldioxy)silane 13C ( <b>1i</b> )       | 20   |
| trans-2-(2-Phenylcyclopropyl)-1-methoxyethyl hydroperoxide 1H ( <b>1k</b> )  | 21   |
| trans-2-(2-Phenylcyclopropyl)-1-methoxyethyl hydroperoxide 13C ( <b>1k</b> ) | 22   |
| 1-Methoxy-2-phenylethyl hydroperoxide 1H ( <b>1l</b> )                       | 23   |
| 1-Methoxy-2-phenylethyl hydroperoxide 13C ( <b>1l</b> )                      | 24   |
| 2-Tetrahydropyranyl hydroperoxide 1H ( <b>1m</b> )                           | 25   |
| 2-Tetrahydropyranyl hydroperoxide 13C ( <b>1m</b> )                          | 26   |
| 4-tert-Butyl-1-methoxycyclohexyl hydroperoxide 1H ( <b>1n</b> )              | 27   |
| 4-tert-Butyl-1-methoxycyclohexyl hydroperoxide 13C ( <b>1n</b> )             | 28   |
| Methyl nonanoate 1H ( <b>2a</b> )                                            | 29   |
| Methyl nonanoate 13C ( <b>2a</b> )                                           | 30   |
| Ethyl nonanoate 1H ( <b>2b</b> )                                             | 31   |
| Ethyl nonanoate 13C ( <b>2b</b> )                                            | 32   |
| Isopropyl nonanoate 1H ( <b>2c</b> )                                         | 33   |
| Isopropyl nonanoate 13C ( <b>2c</b> )                                        | 34   |
| 2-Hydroxyethyl nonanoate 1H ( <b>2d</b> )                                    | 35   |
| 2-Hydroxyethyl nonanoate 13C ( <b>2d</b> )                                   | 36   |
| Methyl 9-acetoxy nonanoate 1H ( <b>2e</b> )                                  | 37   |
| Methyl 9-acetoxy nonanoate 13C ( <b>2e</b> )                                 | 38   |
| Methyl 4-benzyloxy butyrate 1H ( <b>2f</b> )                                 | 39   |
| Methyl 4-benzyloxy butyrate 13C ( <b>2f</b> )                                | 40   |
| Methyl 3-phenyl propionate 1H ( <b>2g</b> )                                  | 41   |

|                                                                |    |
|----------------------------------------------------------------|----|
| Methyl 3-phenyl propionate 13C ( <b>2g</b> )                   | 42 |
| 2-Chloroethyl nonanoate 1H ( <b>2h</b> )                       | 43 |
| 2-Chloroethyl nonanoate 13C ( <b>2h</b> )                      | 44 |
| trans-Methyl 2-phenylcyclopropanecarboxylate 1H ( <b>2k</b> )  | 45 |
| trans-Methyl 2-phenylcyclopropanecarboxylate 13C ( <b>2k</b> ) | 46 |
| Methyl benzoate 1H ( <b>2l</b> )                               | 47 |
| Methyl benzoate 13C ( <b>2l</b> )                              | 48 |
| $\delta$ -Valerolactone 1H ( <b>2m</b> )                       | 49 |
| $\delta$ -Valerolactone 13C ( <b>2m</b> )                      | 50 |
| Methyl 4-tert-Butyl-6-chloro hexanoate 1H ( <b>3</b> )         | 51 |
| Methyl 4-tert-Butyl-6-chloro hexanoate 13C ( <b>3</b> )        | 52 |

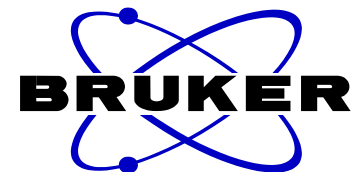

Current Data Parameters  
NAME TFish0460\_Product\_063009  
EXPNO 1  
PROCNO 1

F2 - Acquisition Parameters  
Date\_ 20090630  
Time\_ 20.13  
INSTRUM spect  
PROBHD 5 mm Multinucl  
PULPROG zg30  
TD 65536  
SOLVENT CDC13  
NS 16  
DS 2  
SWH 8278.146 Hz  
FIDRES 0.126314 Hz  
AQ 3.9584243 sec  
RG 90.5  
DW 60.400 usec  
DE 6.50 usec  
TE 295.5 K  
D1 1.00000000 sec  
TD0 1

==== CHANNEL f1 =====  
NUC1 1H  
P1 12.50 usec  
PL1 -2.50 dB  
SFO1 400.1324710 MHz

F2 - Processing parameters  
SI 32768  
SF 400.1300000 MHz  
WDW EM  
SSB 0  
LB 0.30 Hz  
GB 0  
PC 1.00

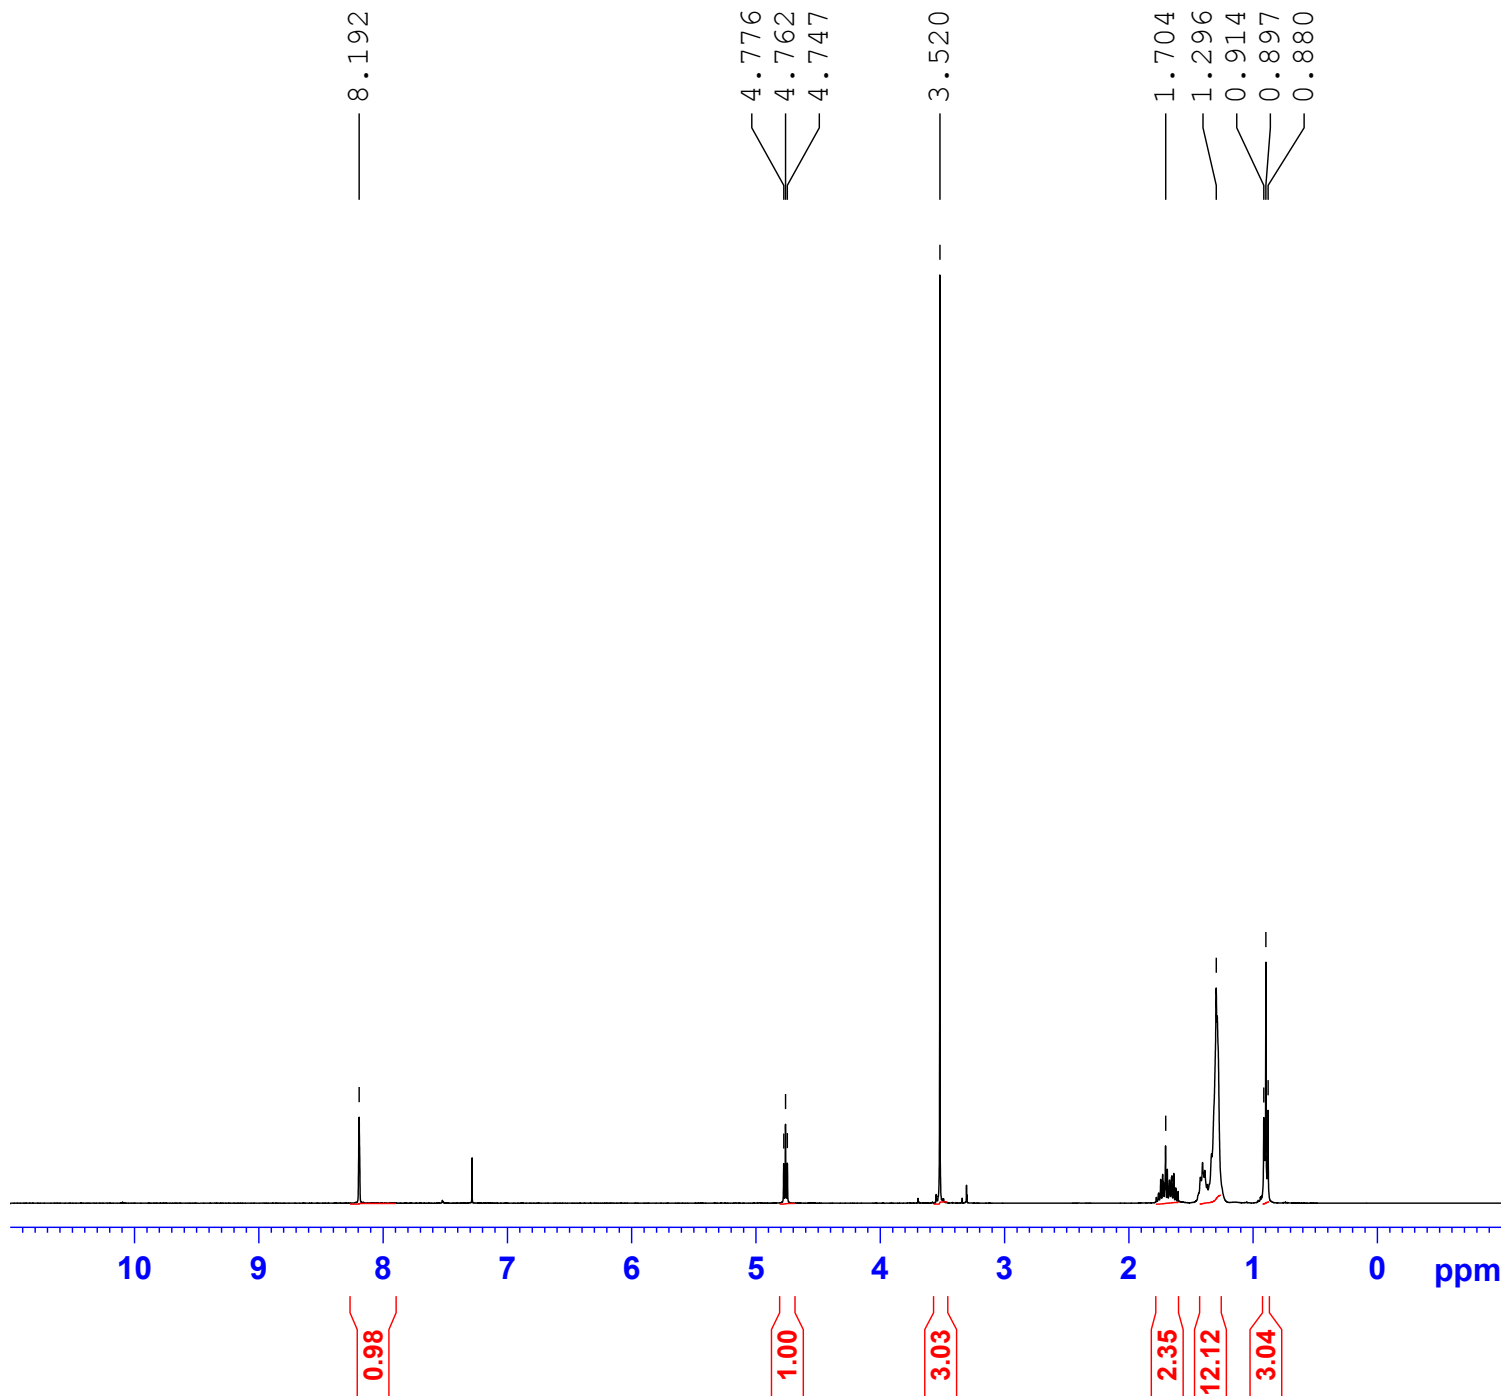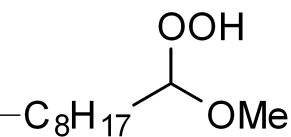



Current Data Parameters  
NAME TFish0460\_Product\_063009  
EXPNO 2  
PROCNO 1

F2 - Acquisition Parameters  
Date\_ 20090630  
Time 20.16  
INSTRUM spect  
PROBHD 5 mm Multinucl  
PULPROG zgpg30  
TD 65536  
SOLVENT CDCl3  
NS 144  
DS 4  
SWH 23980.814 Hz  
FIDRES 0.365918 Hz  
AQ 1.3664756 sec  
RG 5160.6  
DW 20.850 usec  
DE 6.50 usec  
TE 295.9 K  
D1 2.00000000 sec  
D11 0.03000000 sec  
TD0 1

==== CHANNEL f1 =====  
NUC1 13C  
P1 10.00 usec  
PL1 0.00 dB  
SFO1 100.6228298 MHz

==== CHANNEL f2 =====  
CPDPRG2 waltz16  
NUC2 1H  
PCPD2 80.00 usec  
PL2 -2.50 dB  
PL12 13.62 dB  
PL13 13.62 dB  
SFO2 400.1316005 MHz

F2 - Processing parameters  
SI 32768  
SF 100.6127690 MHz  
WDW EM  
SSB 0  
LB 1.00 Hz  
GB 0  
PC 1.40

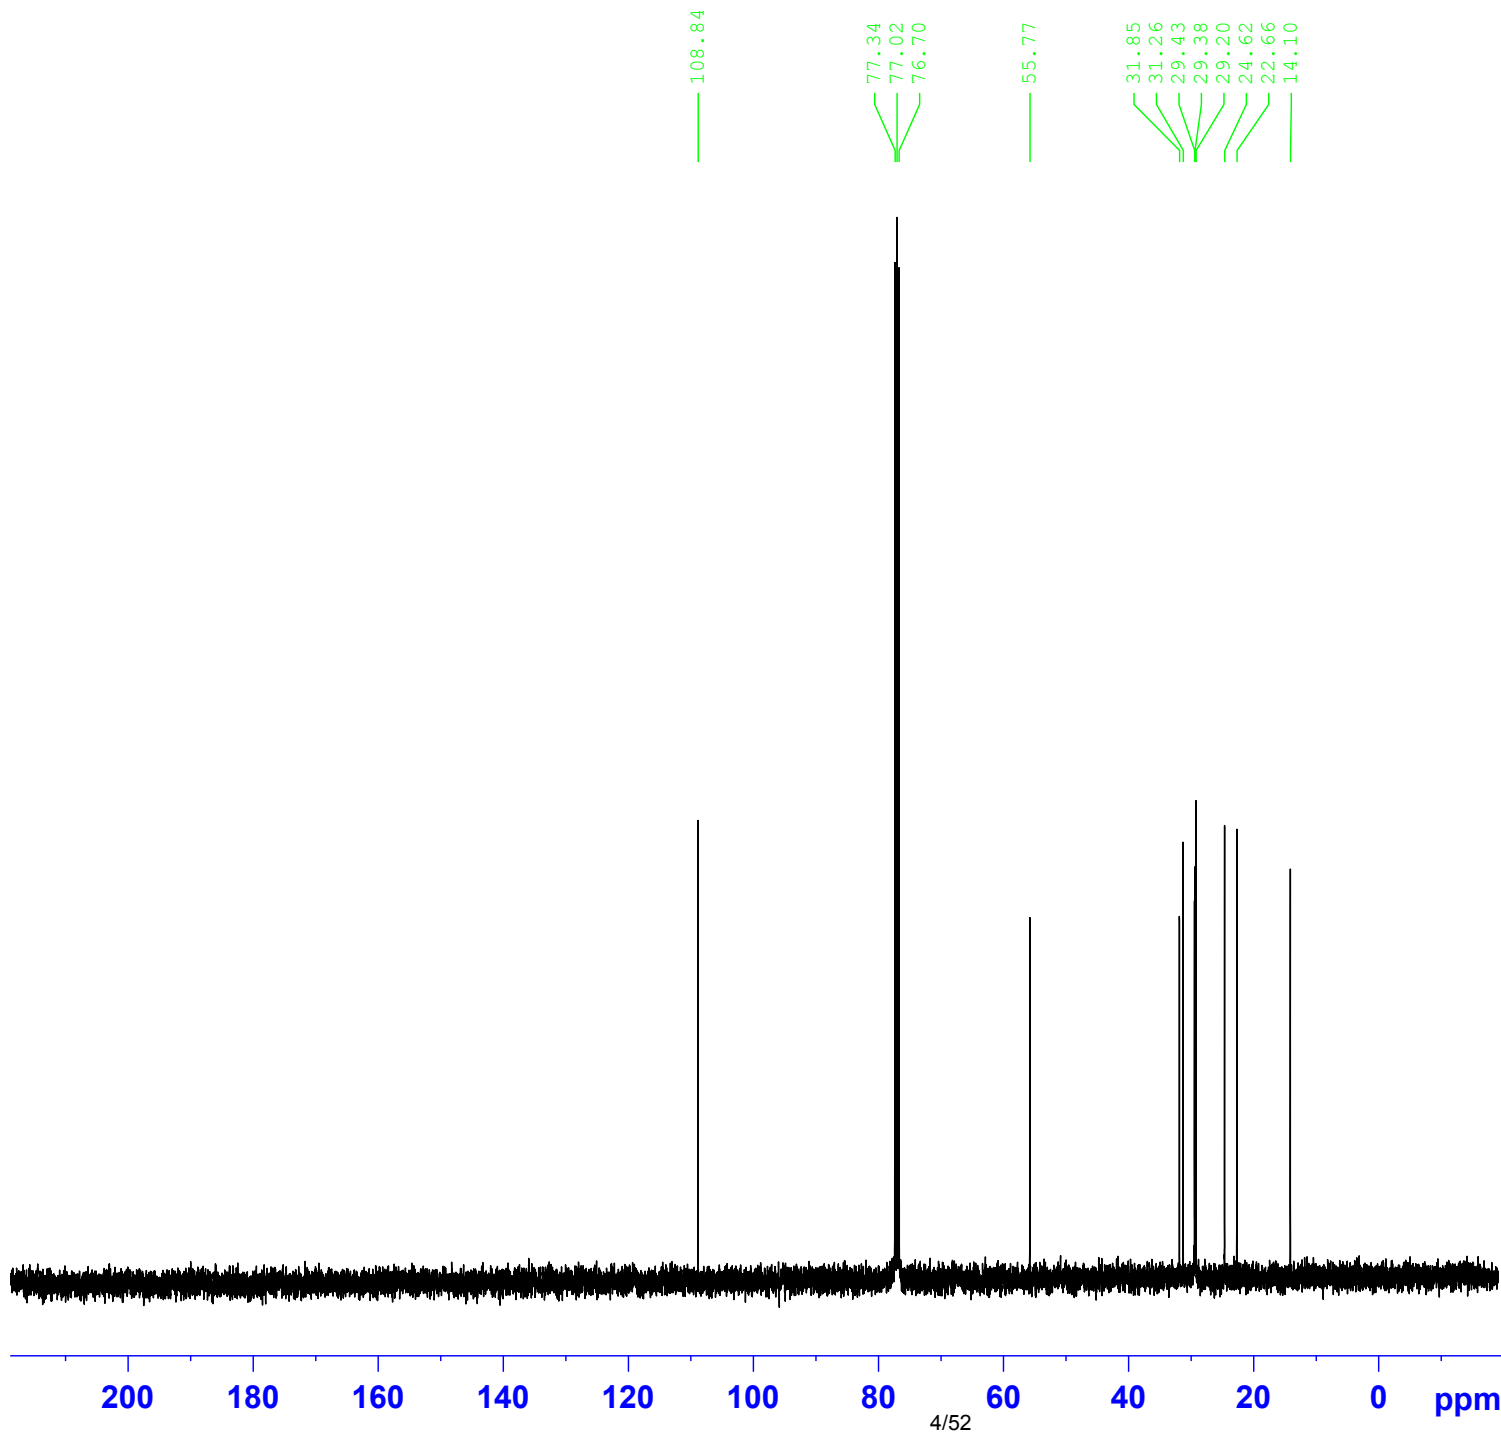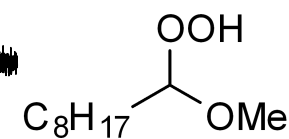

1a

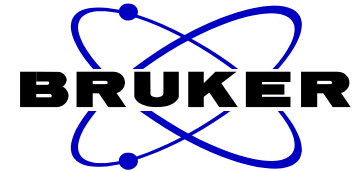

Current Data Parameters  
NAME TFish0260\_product\_091808  
EXPNO 1  
PROCNO 1

F2 - Acquisition Parameters  
Date\_ 20080918  
Time\_ 21.47  
INSTRUM spect  
PROBHD 5 mm Multinucl  
PULPROG zg30  
TD 65536  
SOLVENT CDC13  
NS 16  
DS 2  
SWH 8278.146 Hz  
FIDRES 0.126314 Hz  
AQ 3.9584243 sec  
RG 40.3  
DW 60.400 usec  
DE 6.50 usec  
TE 294.5 K  
D1 1.00000000 sec  
TD0 1

==== CHANNEL f1 =====  
NUC1 1H  
P1 16.25 usec  
PL1 0.00 dB  
SFO1 400.1324710 MHz

F2 - Processing parameters  
SI 32768  
SF 400.1300000 MHz  
WDW EM  
SSB 0  
LB 0.30 Hz  
GB 0  
PC 1.00

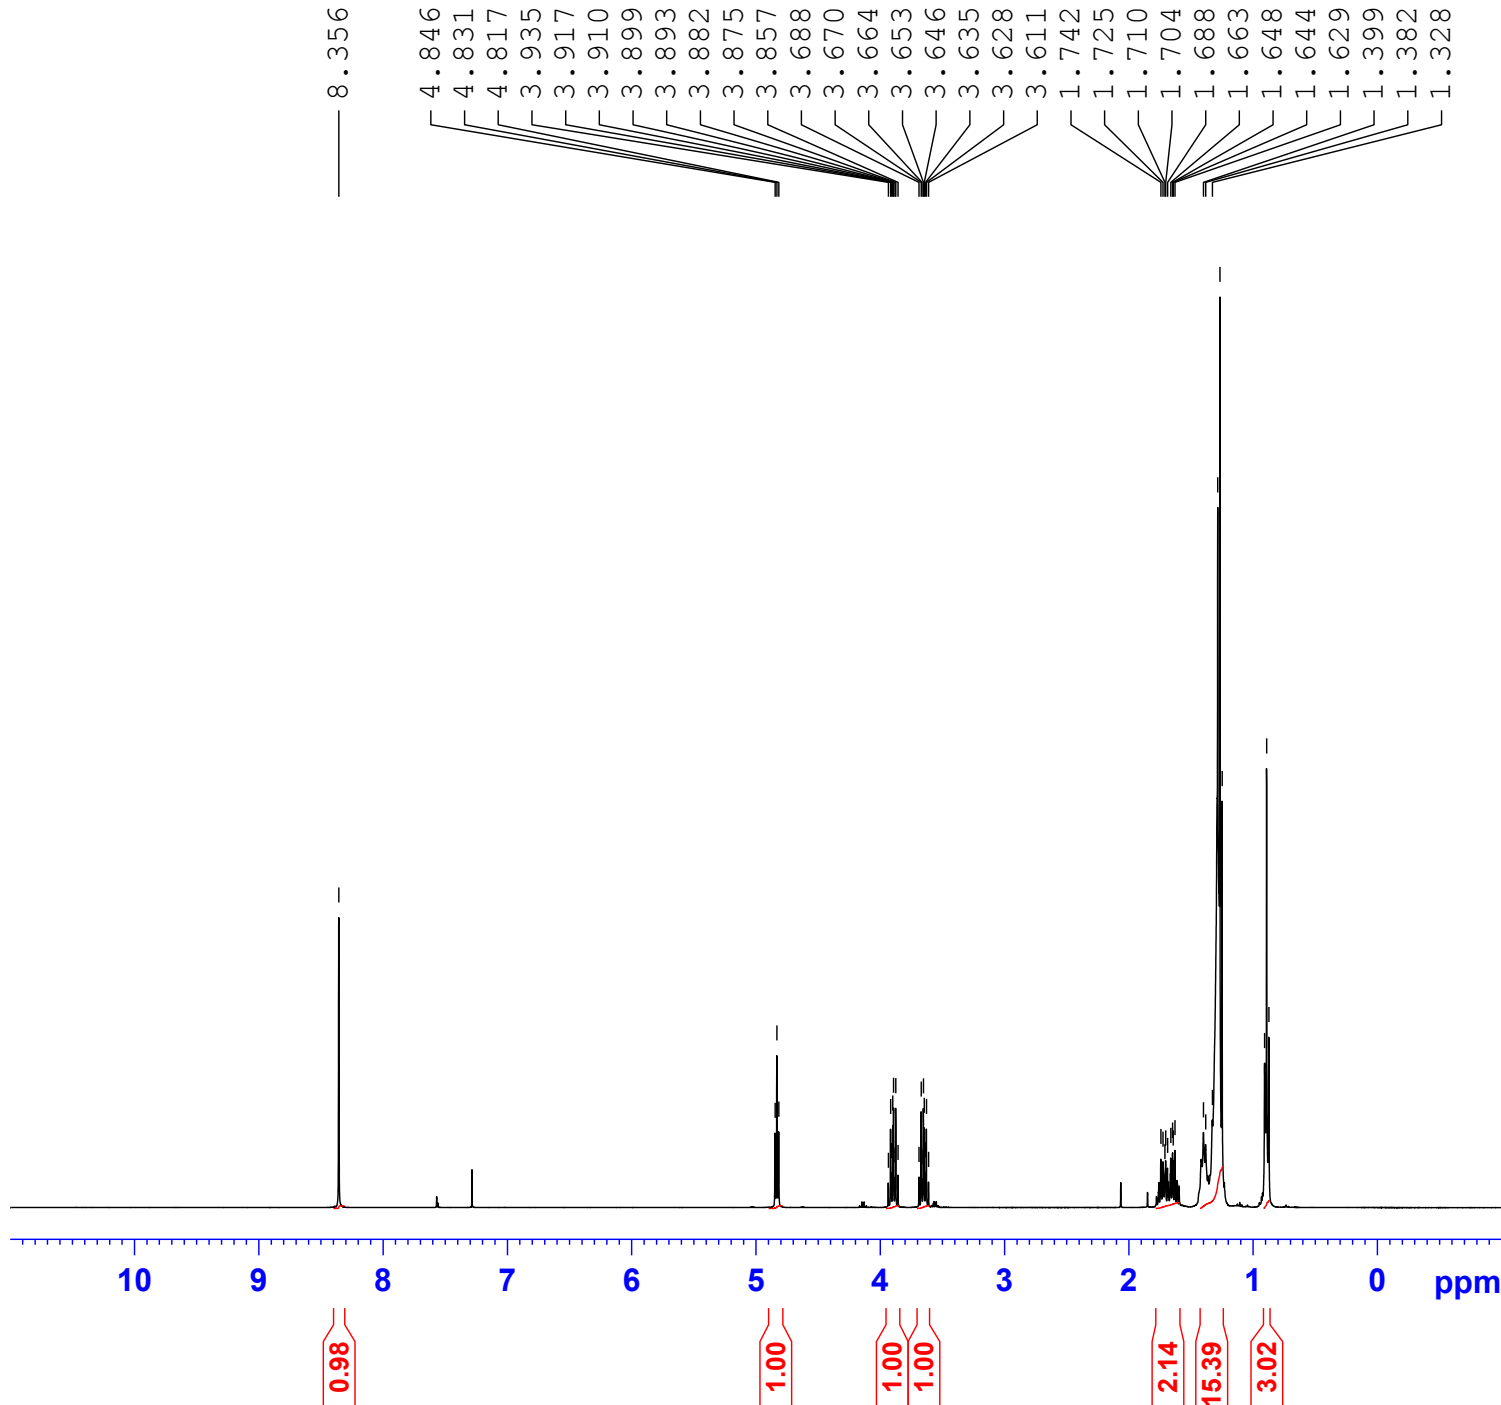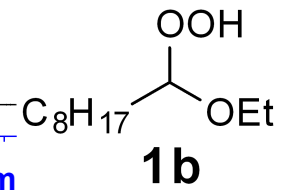

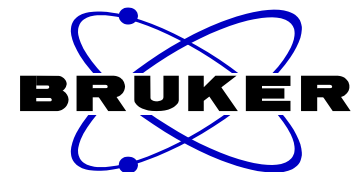

Current Data Parameters  
NAME TFish0260\_product\_c\_091808  
EXPNO 1  
PROCNO 1

F2 - Acquisition Parameters  
Date\_ 20080918  
Time 21.54  
INSTRUM spect  
PROBHD 5 mm Multinucl  
PULPROG zgpg30  
TD 65536  
SOLVENT CDCl3  
NS 35  
DS 4  
SWH 23980.814 Hz  
FIDRES 0.365918 Hz  
AQ 1.3664756 sec  
RG 32768  
DW 20.850 usec  
DE 6.50 usec  
TE 294.7 K  
D1 2.00000000 sec  
D11 0.03000000 sec  
TD0 1

==== CHANNEL f1 =====  
NUC1 13C  
P1 10.25 usec  
PL1 0.00 dB  
SFO1 100.6228298 MHz

==== CHANNEL f2 =====  
CPDPRG2 waltz16  
NUC2 1H  
PCPD2 80.00 usec  
PL2 0.00 dB  
PL12 13.00 dB  
PL13 13.00 dB  
SFO2 400.1316005 MHz

F2 - Processing parameters  
SI 32768  
SF 100.6127690 MHz  
WDW EM  
SSB 0  
LB 1.00 Hz  
GB 0  
PC 1.40

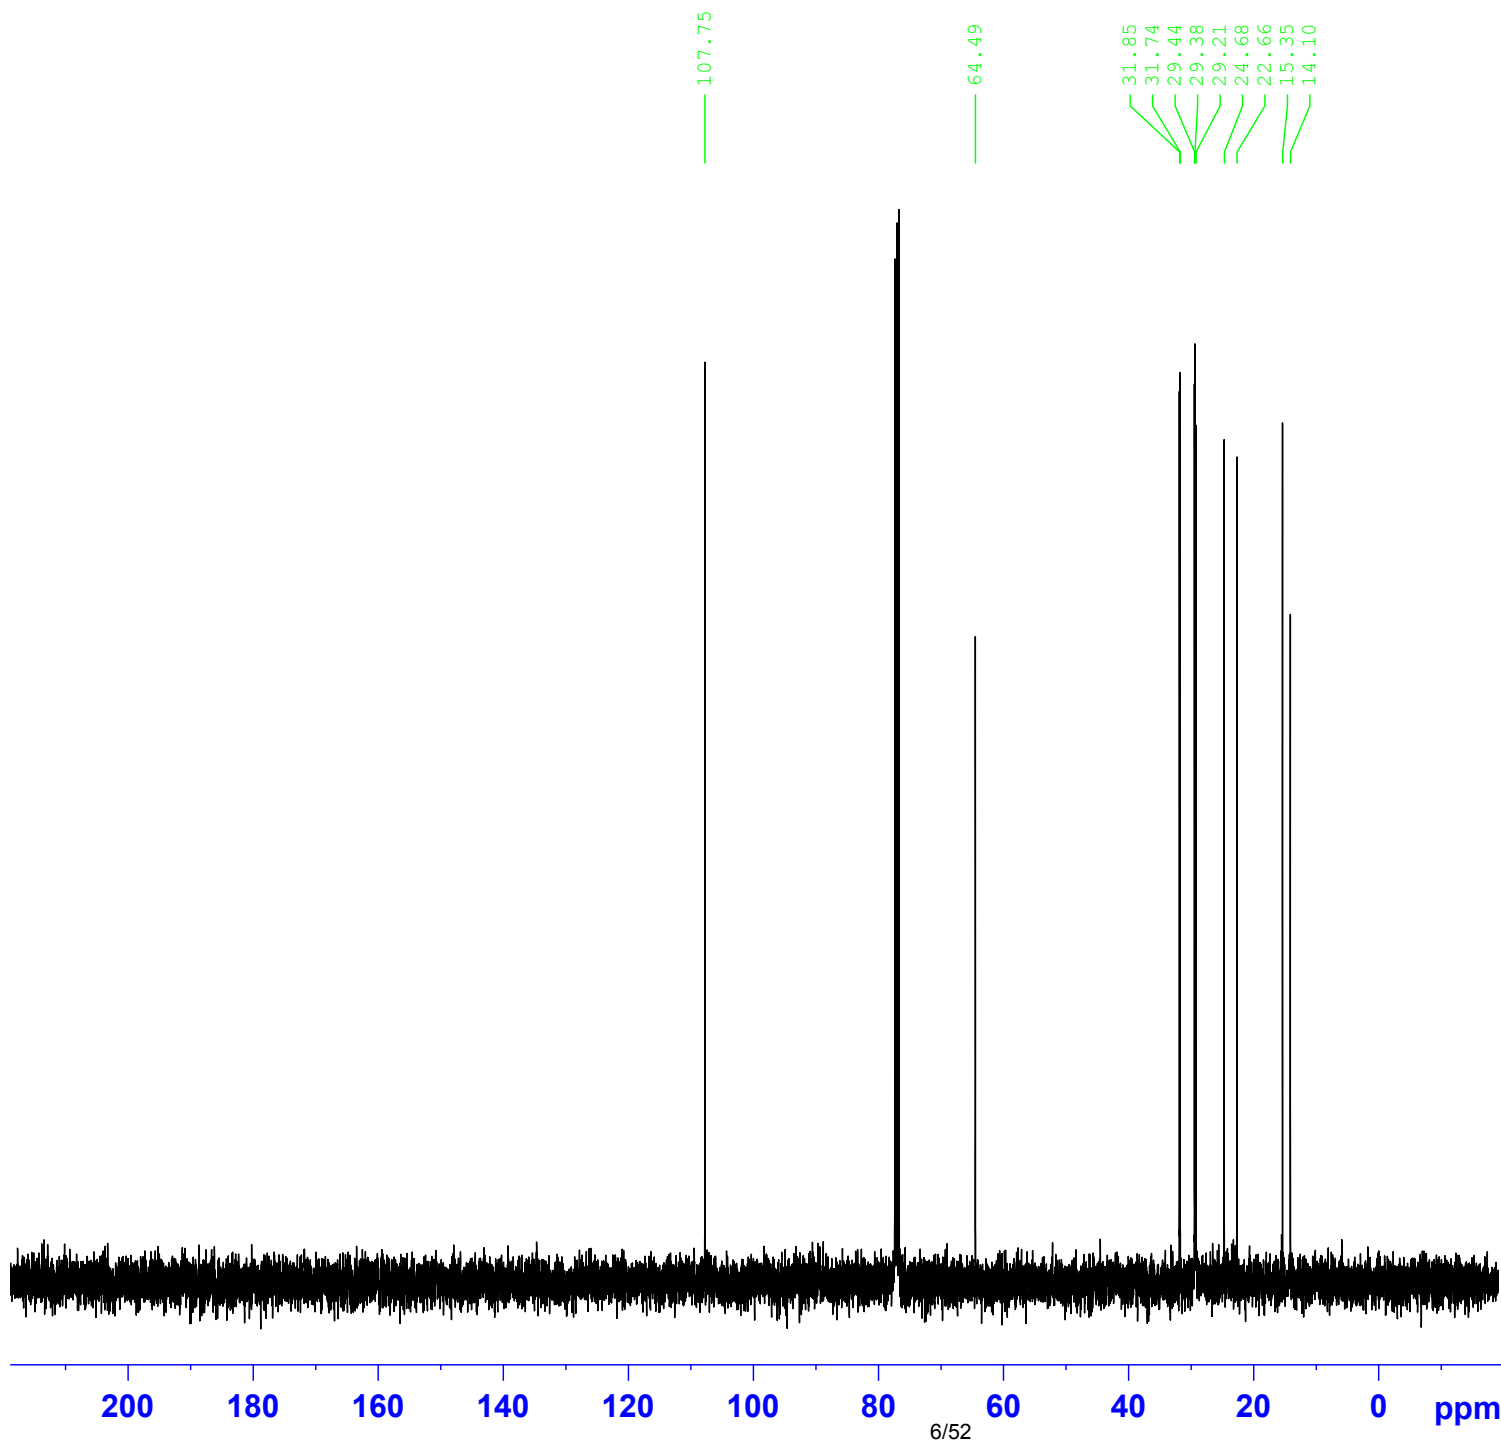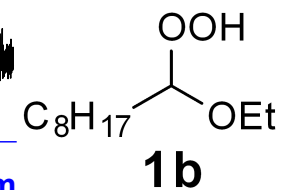



Current Data Parameters  
NAME TFish0288\_product\_102108  
EXPNO 1  
PROCNO 1

F2 - Acquisition Parameters  
Date\_ 20081021  
Time\_ 11.25  
INSTRUM spect  
PROBHD 5 mm QNP 1H/13  
PULPROG zg30  
TD 65536  
SOLVENT CDC13  
NS 16  
DS 2  
SWH 6172.839 Hz  
FIDRES 0.094190 Hz  
AQ 5.3084660 sec  
RG 90.5  
DW 81.000 usec  
DE 6.50 usec  
TE 293.6 K  
D1 1.00000000 sec  
TD0 1

===== CHANNEL f1 =====  
NUC1 1H  
P1 8.05 usec  
PL1 0.60 dB  
SFO1 300.1318534 MHz

F2 - Processing parameters  
SI 32768  
SF 300.1300000 MHz  
WDW EM  
SSB 0  
LB 0.30 Hz  
GB 0  
PC 1.00

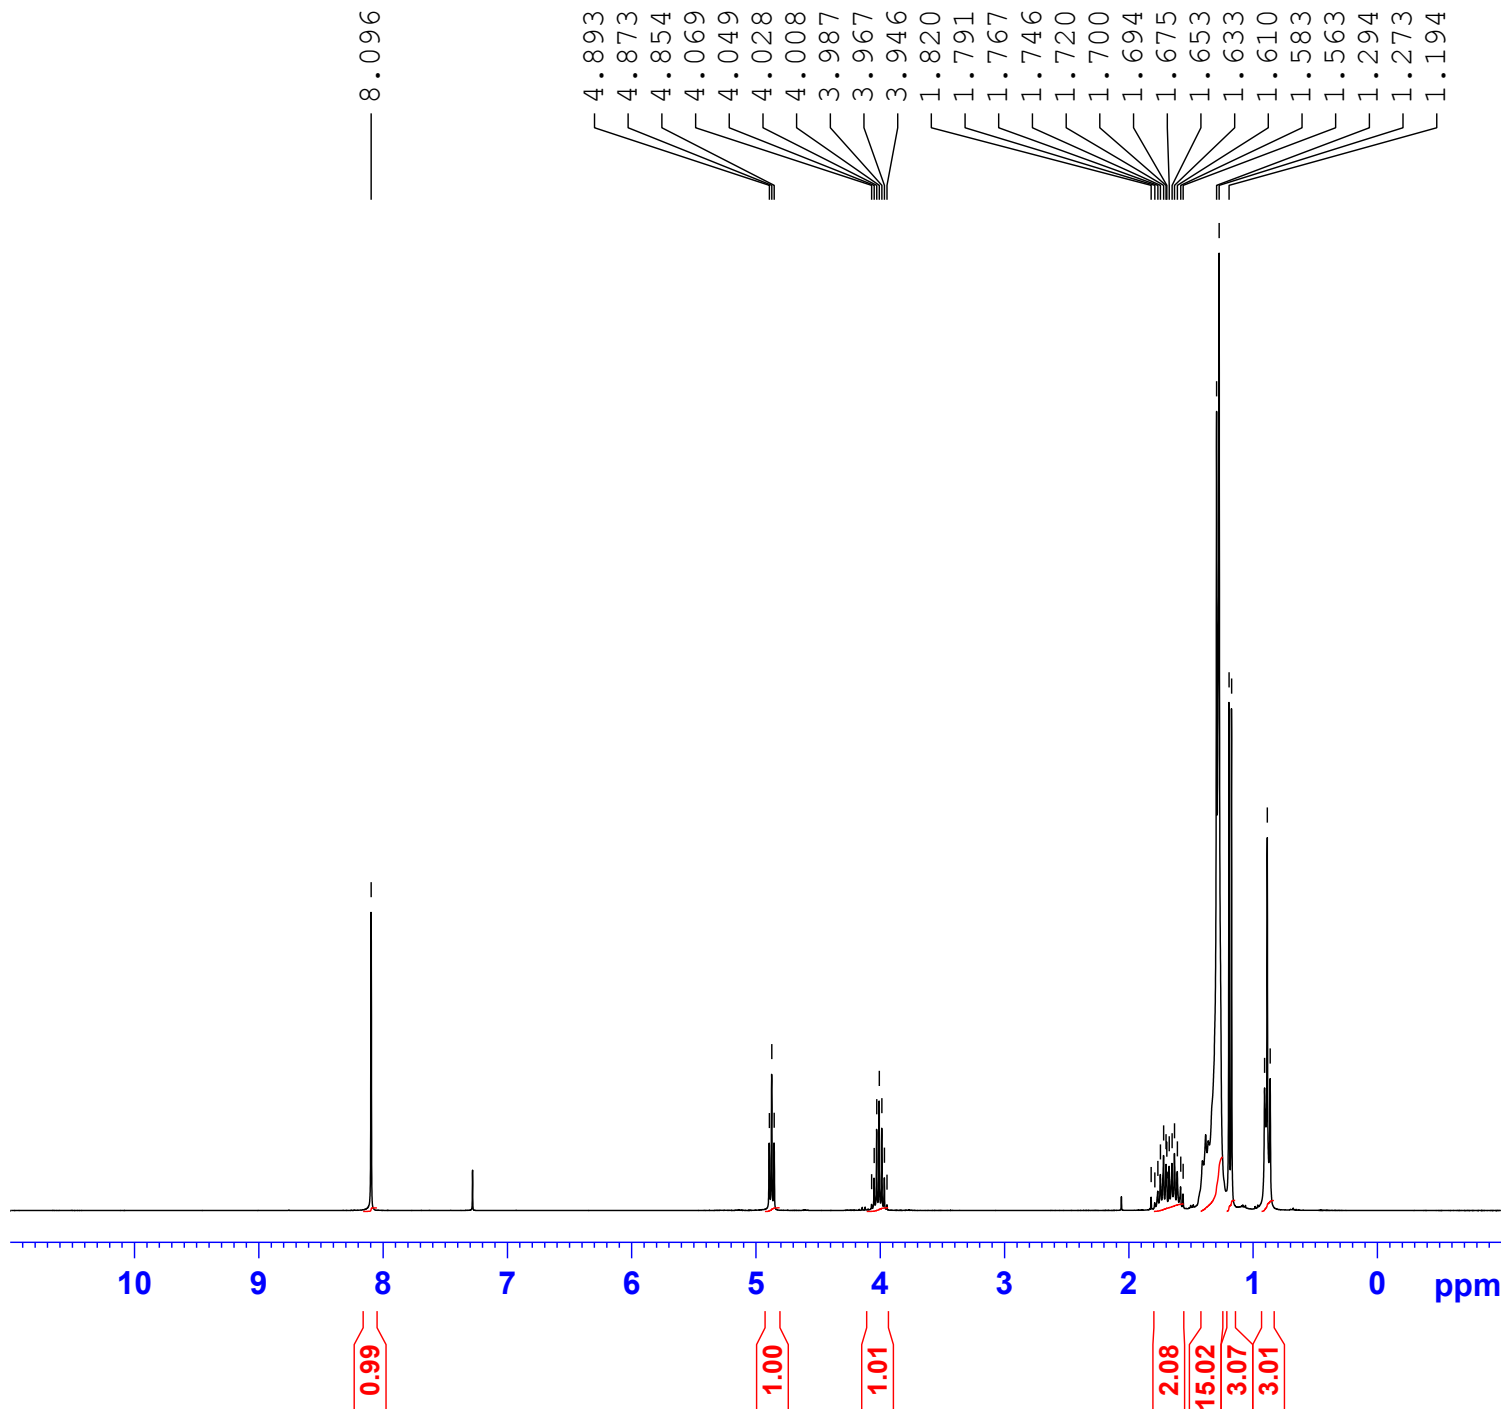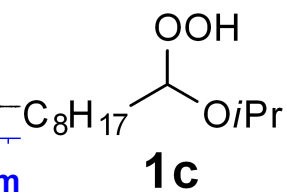



Current Data Parameters  
NAME TFish0288\_product\_c\_102108  
EXPNO 1  
PROCNO 1

F2 - Acquisition Parameters  
Date\_ 20081021  
Time 11.33  
INSTRUM spect  
PROBHD 5 mm QNP 1H/13  
PULPROG zgpg30  
TD 32768  
SOLVENT CDCl3  
NS 123  
DS 4  
SWH 17985.611 Hz  
FIDRES 0.548877 Hz  
AQ 0.9110004 sec  
RG 32768  
DW 27.800 usec  
DE 6.50 usec  
TE 294.1 K  
D1 2.00000000 sec  
D11 0.03000000 sec  
TD0 1

==== CHANNEL f1 =====  
NUC1 13C  
P1 6.25 usec  
PL1 0.00 dB  
SFO1 75.4752953 MHz

==== CHANNEL f2 =====  
CPDPRG2 waltz16  
NUC2 1H  
PCPD2 80.00 usec  
PL2 0.60 dB  
PL12 20.55 dB  
PL13 20.55 dB  
SFO2 300.1312005 MHz

F2 - Processing parameters  
SI 32768  
SF 75.4677490 MHz  
WDW EM  
SSB 0  
LB 1.00 Hz  
GB 0  
PC 1.40

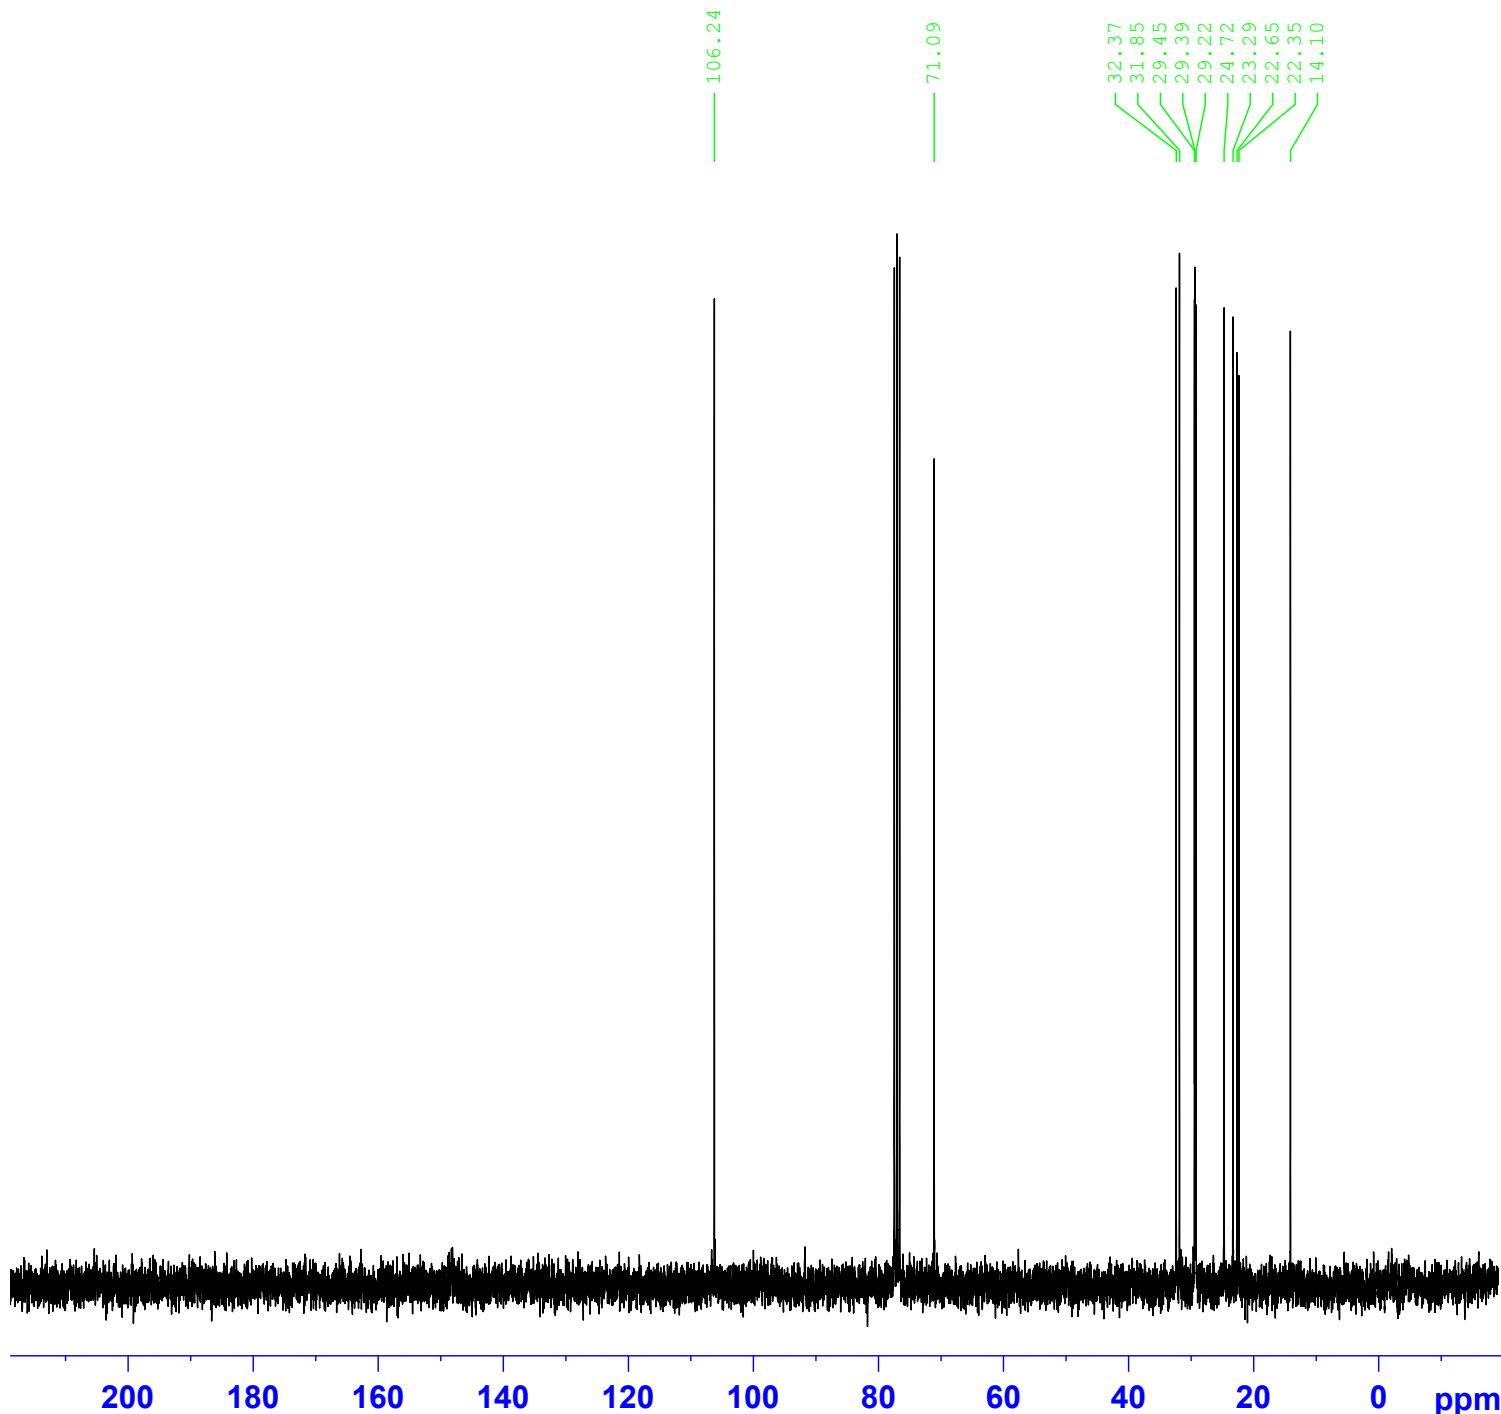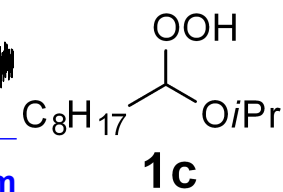



10.182

4.917  
4.902  
4.887  
3.908  
3.896  
3.888  
3.873  
3.865  
3.862  
3.854  
3.845  
3.832  
3.826  
3.813  
1.725  
1.651  
1.635  
1.295  
1.285  
0.912  
0.896  
0.878



Current Data Parameters  
NAME TFish0252\_product\_090508-1  
EXPNO 1  
PROCNO 1

F2 - Acquisition Parameters  
Date\_ 20080905  
Time 21.50  
INSTRUM spect  
PROBHD 5 mm QNP 1H/13  
PULPROG zg30  
TD 65536  
SOLVENT CDC13  
NS 16  
DS 2  
SWH 8278.146 Hz  
FIDRES 0.126314 Hz  
AQ 3.9584243 sec  
RG 128  
DW 60.400 usec  
DE 6.50 usec  
TE 293.3 K  
D1 1.00000000 sec  
TDO 1

==== CHANNEL f1 =====  
NUC1 1H  
P1 10.00 usec  
PL1 -3.35 dB  
SFO1 400.1324710 MHz

F2 - Processing parameters  
SI 32768  
SF 400.1300000 MHz  
WDW EM  
SSB 0  
LB 0.30 Hz  
GB 0  
PC 1.00

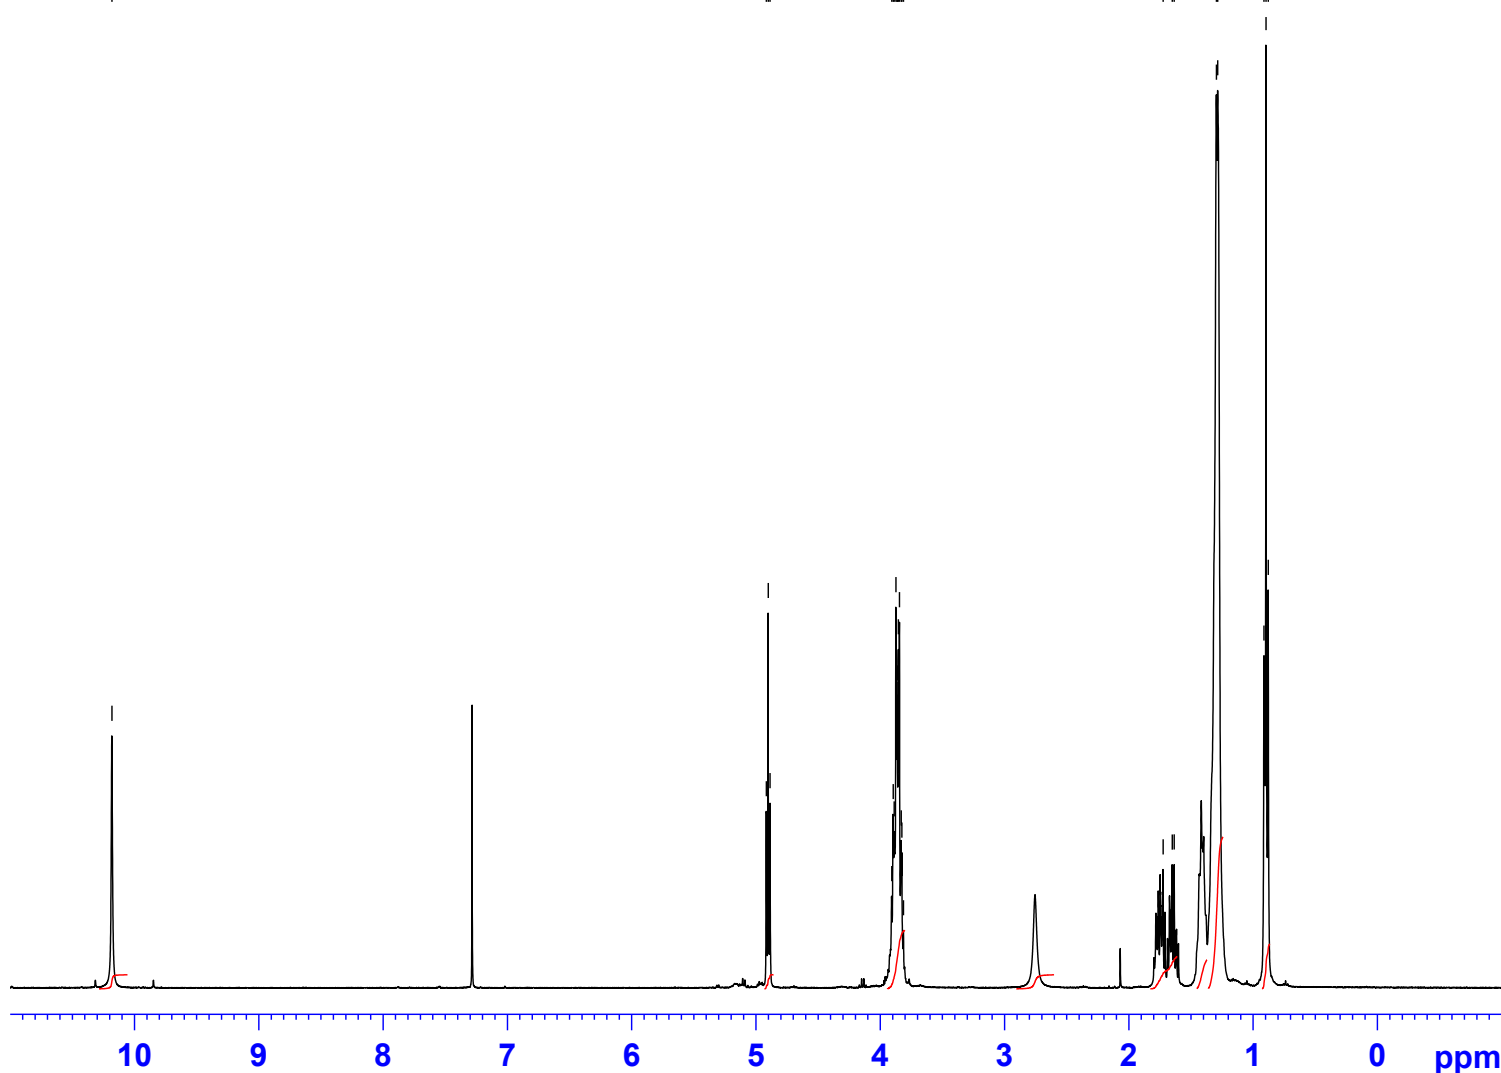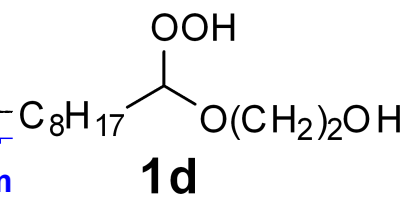



Current Data Parameters  
NAME TFish0252\_product\_c\_090508-1  
EXPNO 1  
PROCNO 1

F2 - Acquisition Parameters  
Date\_ 20080905  
Time\_ 21.57  
INSTRUM spect  
PROBHD 5 mm QNP 1H/13  
PULPROG zgpg30  
TD 65536  
SOLVENT CDCl3  
NS 327  
DS 4  
SWH 23980.814 Hz  
FIDRES 0.365918 Hz  
AQ 1.3664756 sec  
RG 1625.5  
DW 20.850 usec  
DE 6.50 usec  
TE 293.9 K  
D1 2.00000000 sec  
D11 0.03000000 sec  
TD0 1

===== CHANNEL f1 =====  
NUC1 13C  
P1 9.50 usec  
PL1 0.00 dB  
SFO1 100.6228298 MHz

===== CHANNEL f2 =====  
CPDPRG2 waltz16  
NUC2 1H  
PCPD2 70.00 usec  
PL2 -4.00 dB  
PL12 12.90 dB  
PL13 13.82 dB  
SFO2 400.1316005 MHz

F2 - Processing parameters  
SI 32768  
SF 100.6127690 MHz  
WDW EM  
SSB 0  
LB 1.00 Hz  
GB 0  
PC 1.40

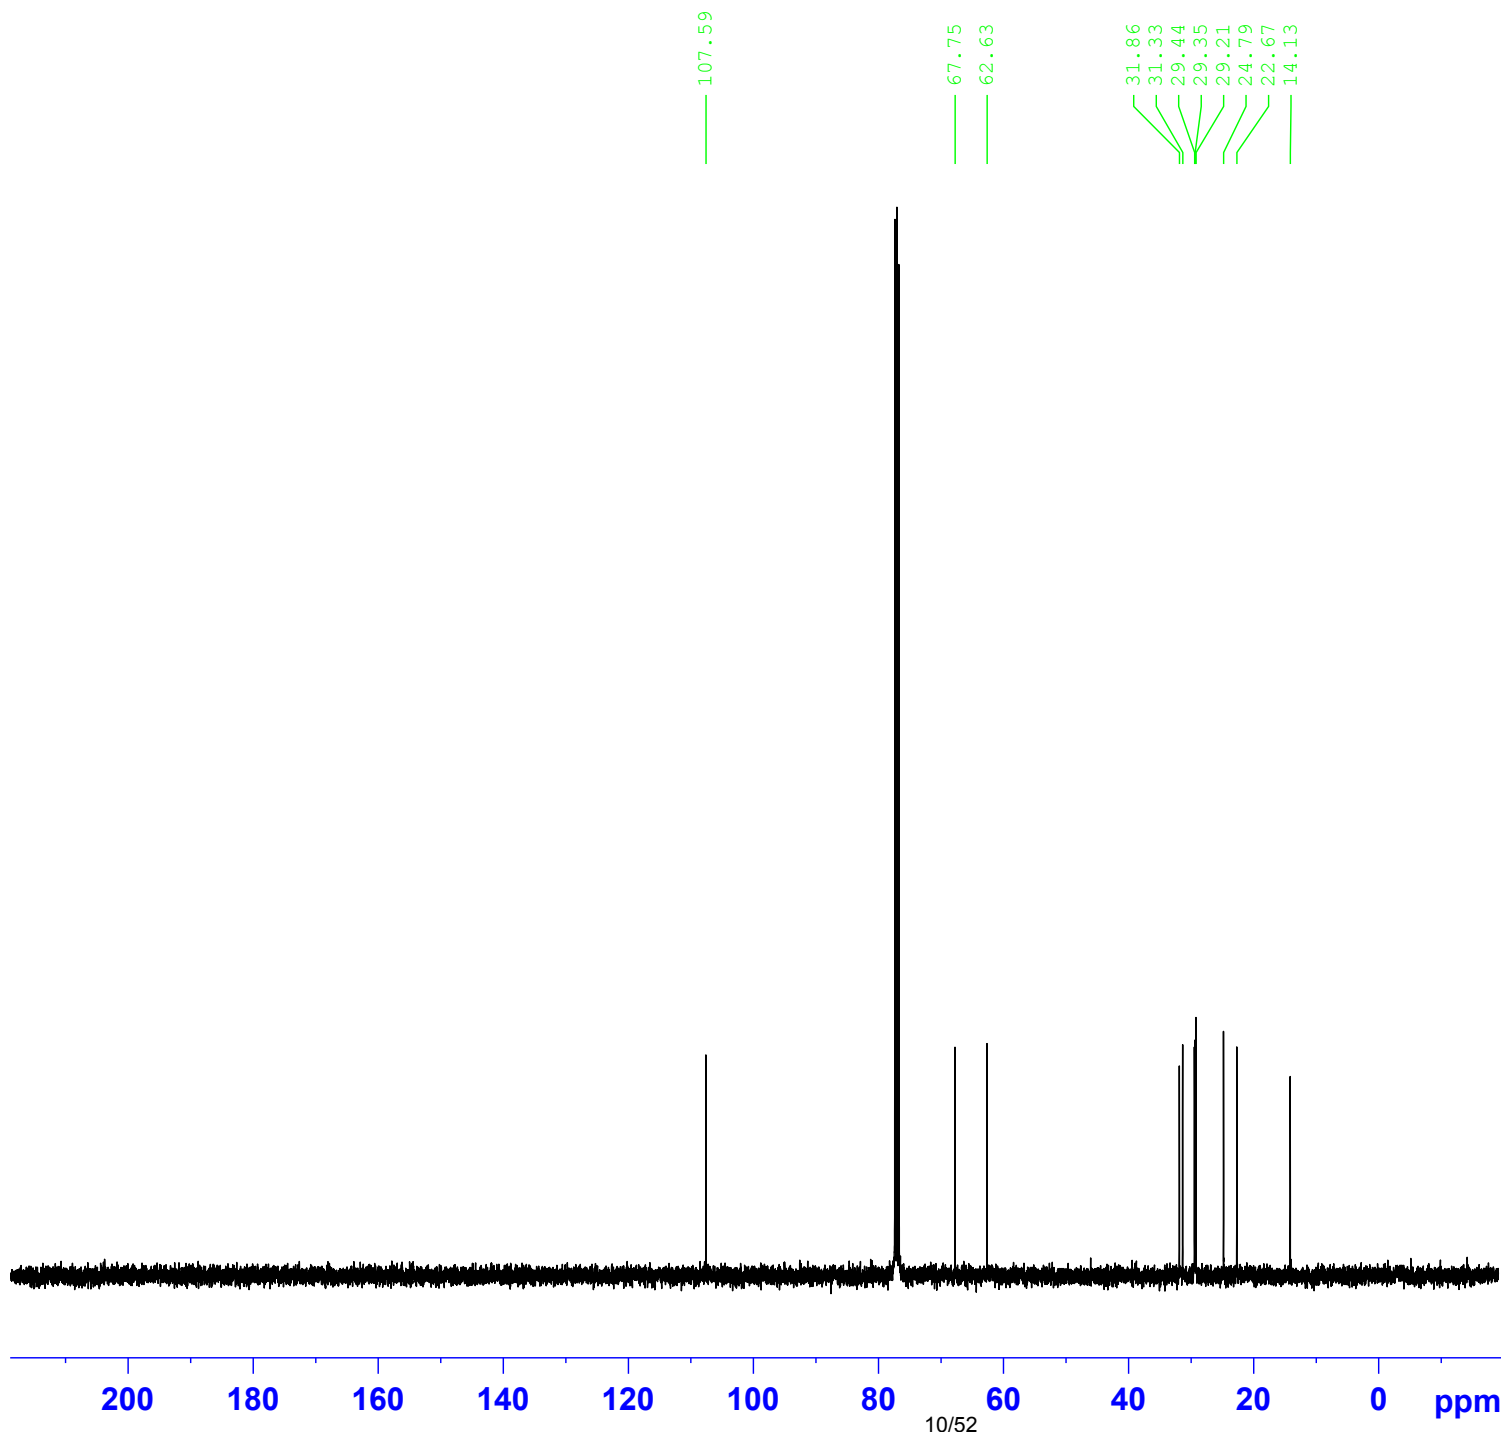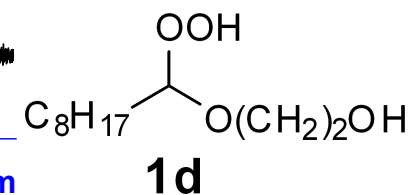



Current Data Parameters  
NAME TFish0444\_product\_062409  
EXPNO 1  
PROCNO 1

F2 - Acquisition Parameters  
Date\_ 20090624  
Time\_ 14.03  
INSTRUM spect  
PROBHD 5 mm Multinucl  
PULPROG zg30  
TD 65536  
SOLVENT CDC13  
NS 16  
DS 2  
SWH 8278.146 Hz  
FIDRES 0.126314 Hz  
AQ 3.9584243 sec  
RG 128  
DW 60.400 usec  
DE 6.50 usec  
TE 295.9 K  
D1 1.00000000 sec  
TD0 1

===== CHANNEL f1 =====  
NUC1 1H  
P1 12.50 usec  
PL1 -2.50 dB  
SFO1 400.1324710 MHz

F2 - Processing parameters  
SI 32768  
SF 400.1300000 MHz  
WDW EM  
SSB 0  
LB 0.30 Hz  
GB 0  
PC 1.00

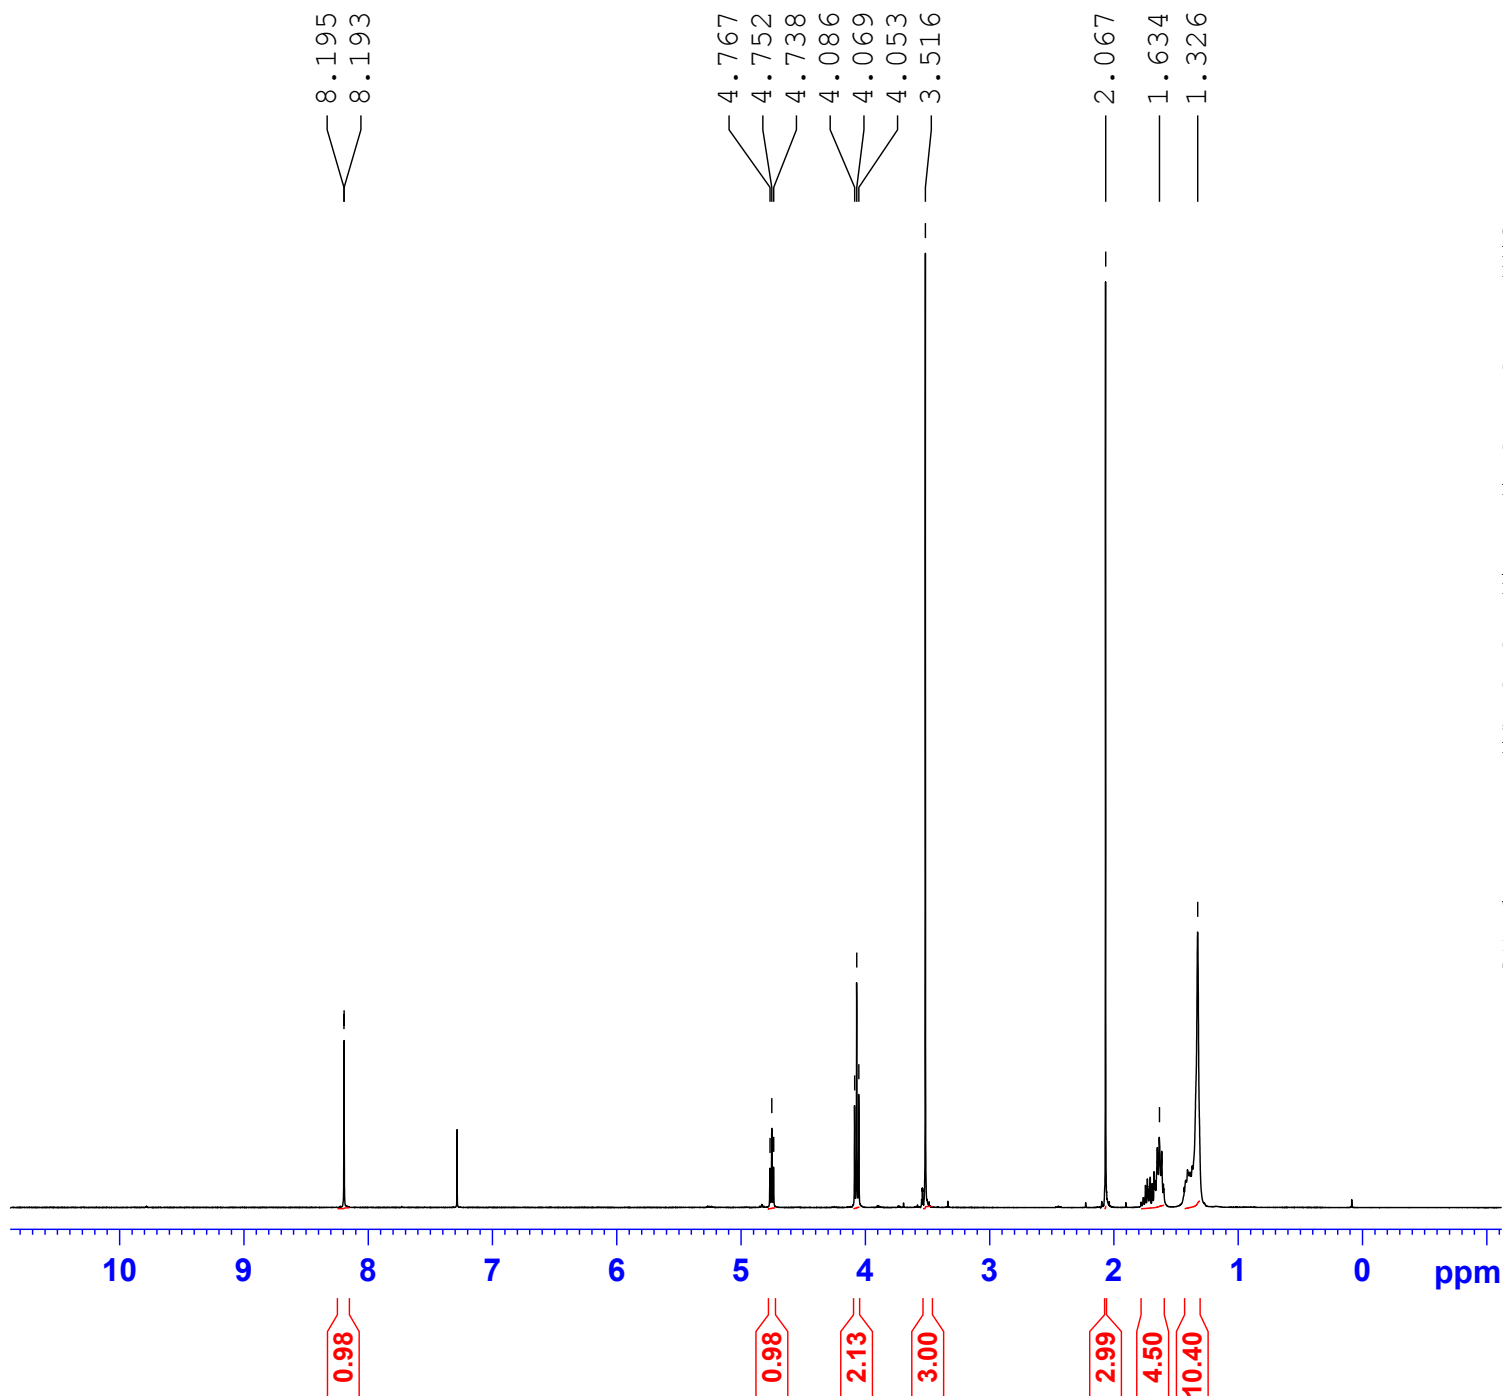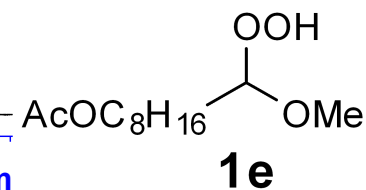



Current Data Parameters  
NAME TFish0444\_product\_062409  
EXPNO 2  
PROCNO 1

F2 - Acquisition Parameters  
Date\_ 20090626  
Time\_ 15.25  
INSTRUM spect  
PROBHD 5 mm Multinucl  
PULPROG zgpg30  
TD 65536  
SOLVENT CDC13  
NS 187  
DS 4  
SWH 23980.814 Hz  
FIDRES 0.365918 Hz  
AQ 1.3664756 sec  
RG 5792.6  
DW 20.850 usec  
DE 6.50 usec  
TE 296.1 K  
D1 2.00000000 sec  
D11 0.03000000 sec  
TD0 1

===== CHANNEL f1 =====  
NUC1 13C  
P1 10.00 usec  
PL1 0.00 dB  
SFO1 100.6228298 MHz

===== CHANNEL f2 =====  
CPDPRG2 waltz16  
NUC2 1H  
PCPD2 80.00 usec  
PL2 -2.50 dB  
PL12 13.62 dB  
PL13 13.62 dB  
SFO2 400.1316005 MHz

F2 - Processing parameters  
SI 32768  
SF 100.6127690 MHz  
WDW EM  
SSB 0  
LB 1.00 Hz  
GB 0  
PC 1.40

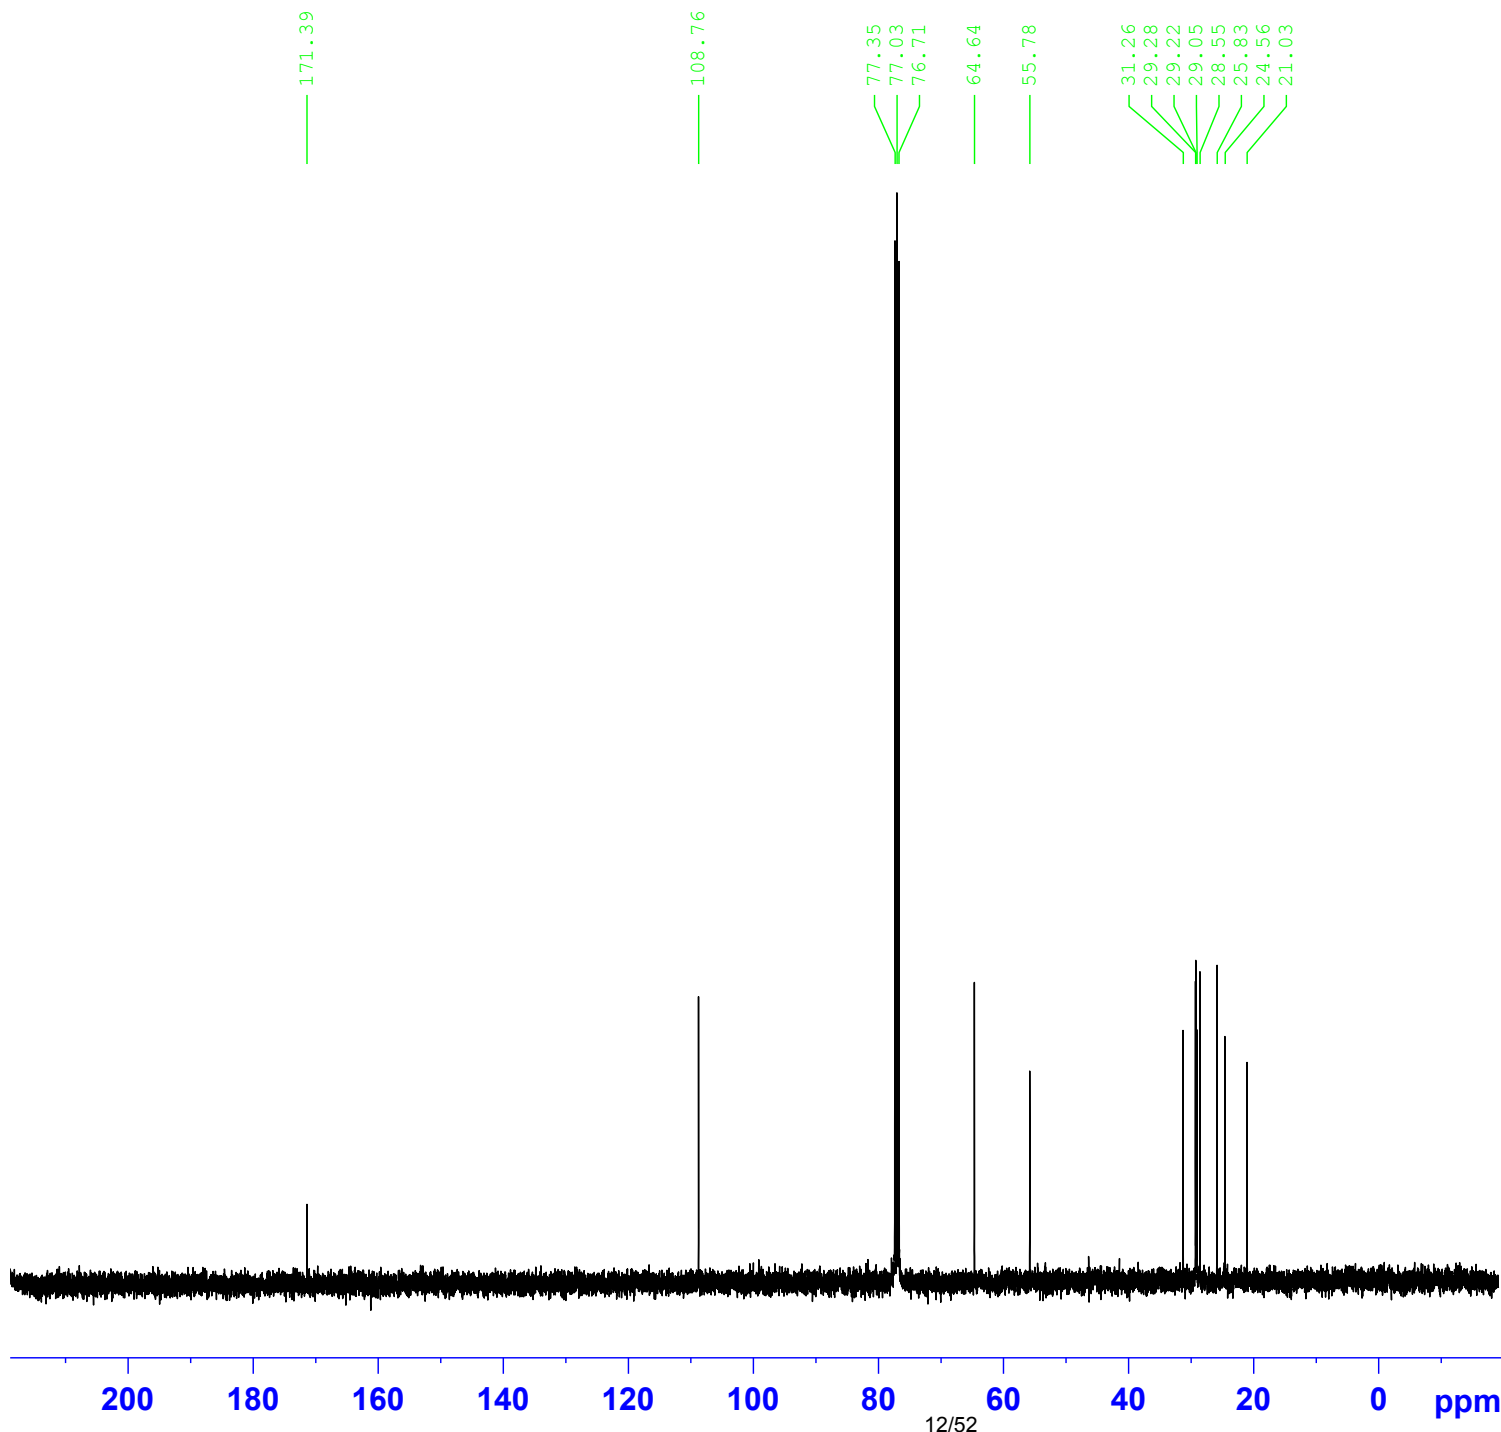

12/52

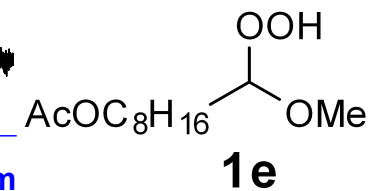

8.555

4.775  
4.757  
4.739  
4.537  
4.528  
4.514  
3.569  
3.559  
3.549  
3.539  
3.531  
3.523  
3.518  
3.503  
2.068  
1.882  
1.800  
1.783  
1.775  
1.766  
1.763  
1.747  
1.727  
1.281



Current Data Parameters  
NAME TFish0425\_product\_060609  
EXPNO 1  
PROCNO 1

F2 - Acquisition Parameters  
Date\_ 20090606  
Time\_ 16.45  
INSTRUM spect  
PROBHD 5 mm QNP 1H/13  
PULPROG zg30  
TD 65536  
SOLVENT CDC13  
NS 16  
DS 2  
SWH 6172.839 Hz  
FIDRES 0.094190 Hz  
AQ 5.3084660 sec  
RG 228.1  
DW 81.000 usec  
DE 6.50 usec  
TE 298.0 K  
D1 1.00000000 sec  
TD0 1

==== CHANNEL f1 =====  
NUC1 1H  
P1 8.14 usec  
PL1 0.60 dB  
SFO1 300.1318534 MHz

F2 - Processing parameters  
SI 32768  
SF 300.1300000 MHz  
WDW EM  
SSB 0  
LB 0.30 Hz  
GB 0  
PC 1.00

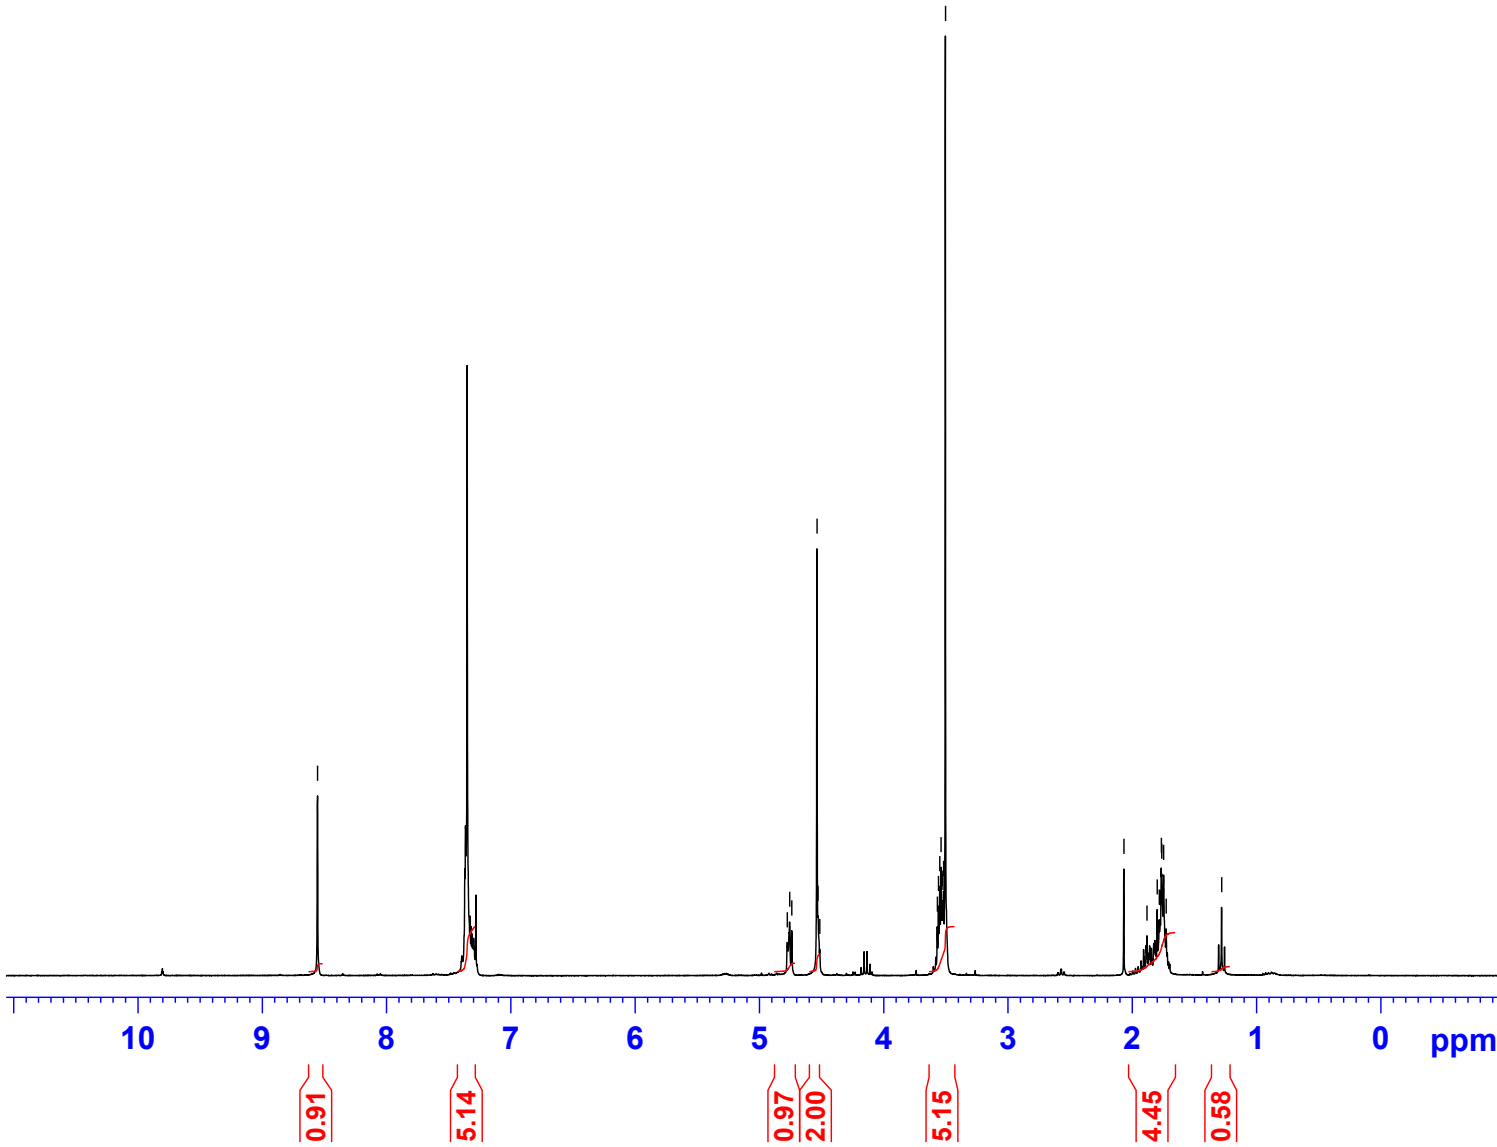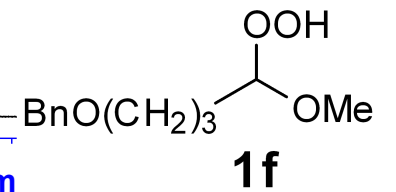



Current Data Parameters  
NAME TFish0425\_product\_060609  
EXPNO 2  
PROCNO 1

F2 - Acquisition Parameters  
Date\_ 20090606  
Time 16.51  
INSTRUM spect  
PROBHD 5 mm QNP 1H/13  
PULPROG zgpg30  
TD 32768  
SOLVENT CDC13  
NS 113  
DS 4  
SWH 17985.611 Hz  
FIDRES 0.548877 Hz  
AQ 0.9110004 sec  
RG 13004  
DW 27.800 usec  
DE 6.50 usec  
TE 298.0 K  
D1 2.00000000 sec  
D11 0.03000000 sec  
TD0 1

===== CHANNEL f1 =====  
NUC1 13C  
P1 6.25 usec  
PL1 0.00 dB  
SFO1 75.4752953 MHz

===== CHANNEL f2 =====  
CPDPRG2 waltz16  
NUC2 1H  
PCPD2 80.00 usec  
PL2 0.60 dB  
PL12 20.45 dB  
PL13 20.55 dB  
SFO2 300.1312005 MHz

F2 - Processing parameters  
SI 32768  
SF 75.4677490 MHz  
WDW EM  
SSB 0  
LB 1.00 Hz  
GB 0  
PC 1.40

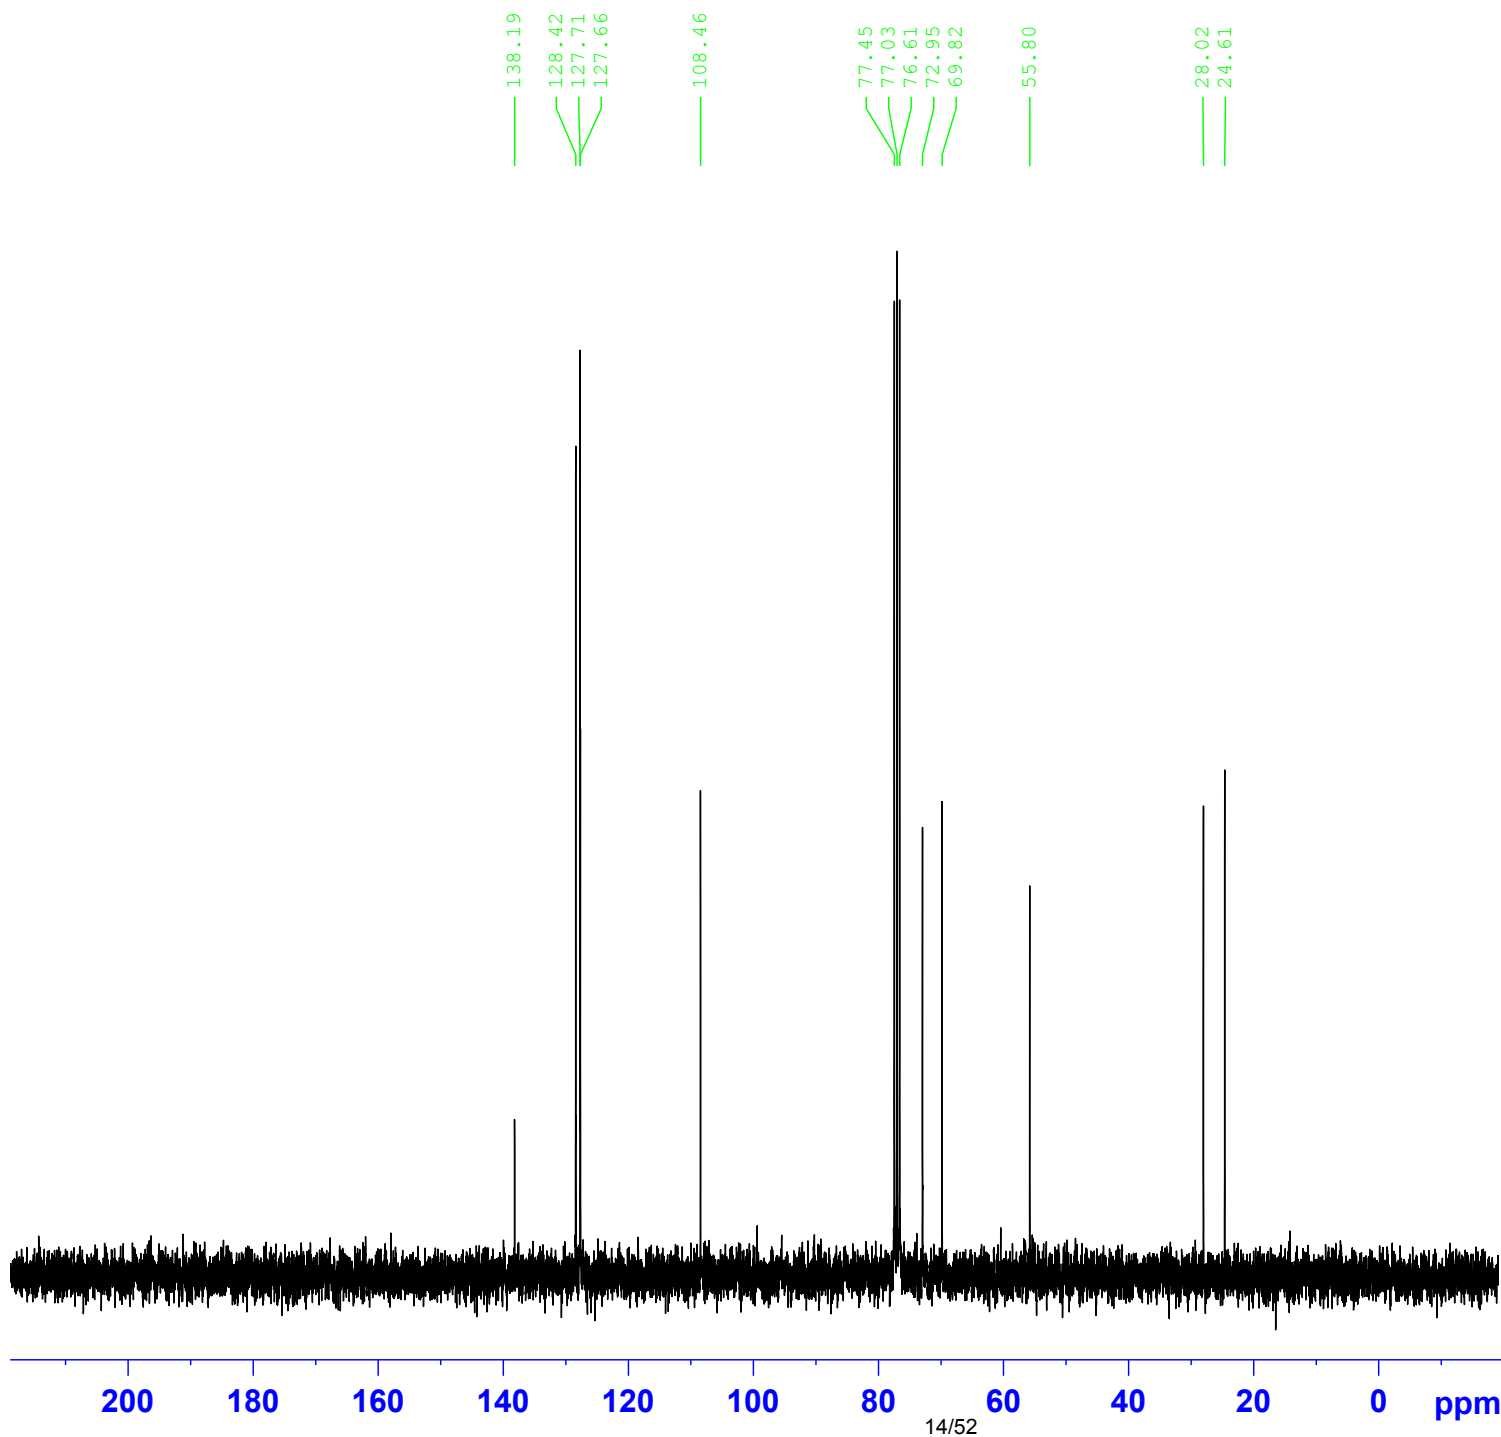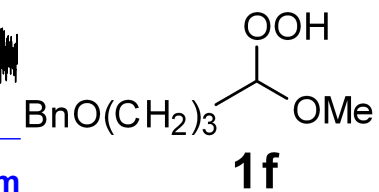



Current Data Parameters  
NAME TFish0452\_product\_dry\_062909  
EXPNO 1  
PROCNO 1

F2 - Acquisition Parameters  
Date\_ 20090629  
Time\_ 12.48  
INSTRUM spect  
PROBHD 5 mm Multinucl  
PULPROG zg30  
TD 65536  
SOLVENT CDCl3  
NS 16  
DS 2  
SWH 8278.146 Hz  
FIDRES 0.126314 Hz  
AQ 3.9584243 sec  
RG 90.5  
DW 60.400 usec  
DE 6.50 usec  
TE 294.8 K  
D1 1.00000000 sec  
TDO 1

=====  
CHANNEL f1  
NUC1 1H  
P1 12.50 usec  
PL1 -2.50 dB  
SFO1 400.1324710 MHz

F2 - Processing parameters  
SI 32768  
SF 400.1300000 MHz  
WDW EM  
SSB 0  
LB 0.30 Hz  
GB 0  
PC 1.00

8.199  
7.342  
7.323  
7.305  
7.284  
7.244  
7.236  
7.229  
7.224  
4.760  
4.745  
4.730  
3.531  
2.780  
2.760  
2.740  
2.115  
2.095  
2.080  
2.039  
2.025

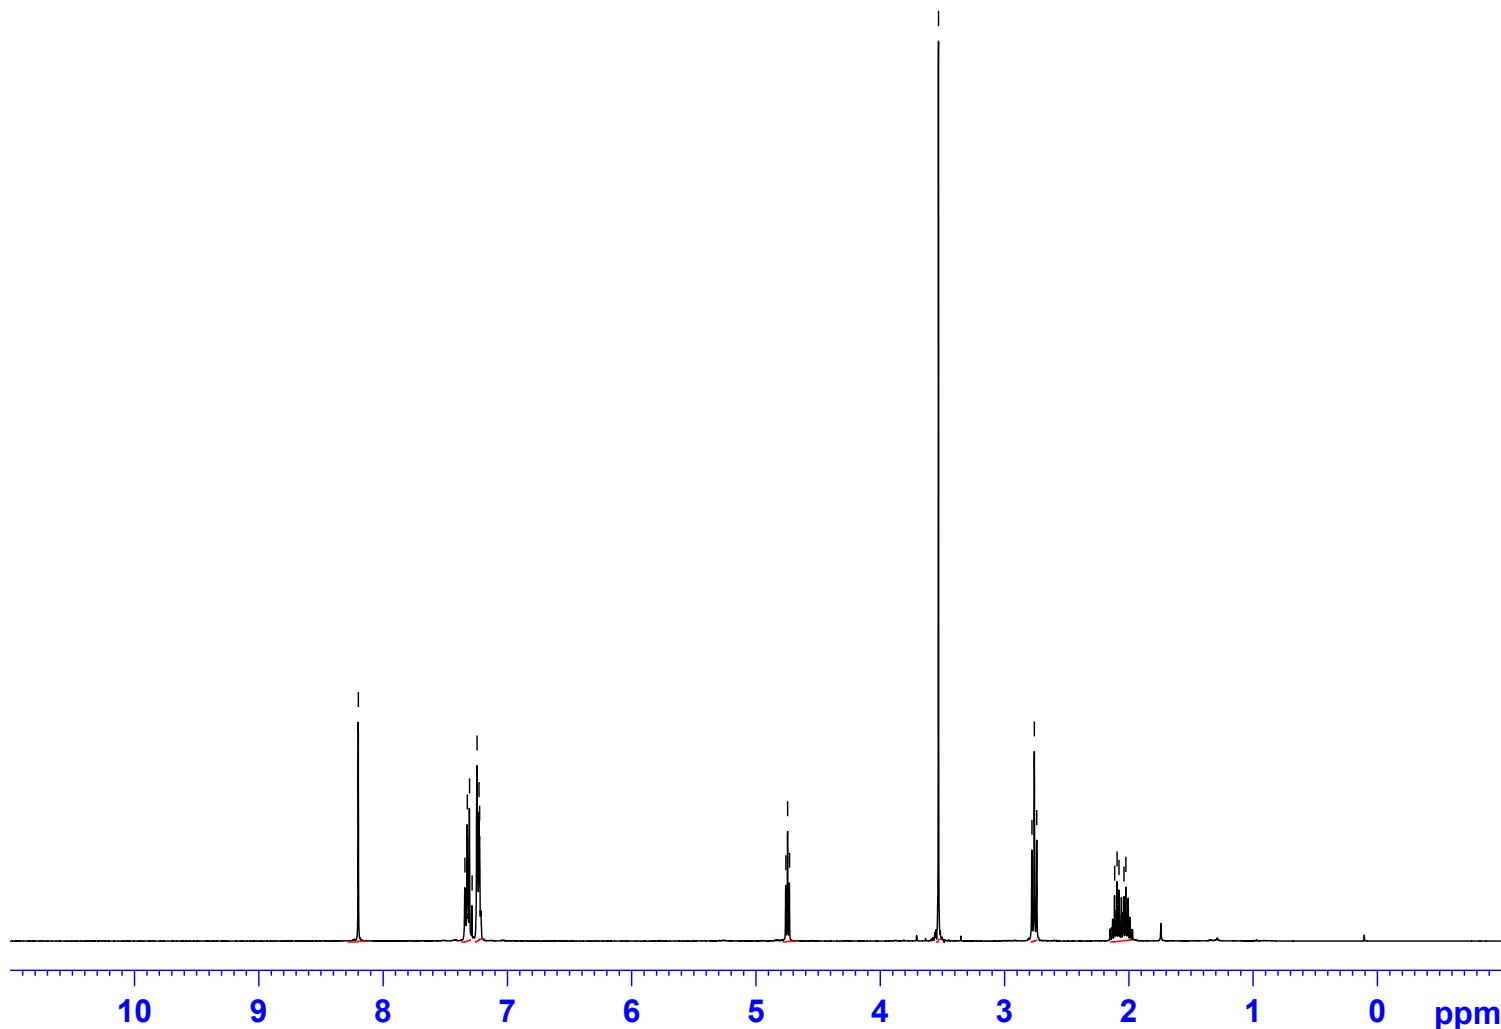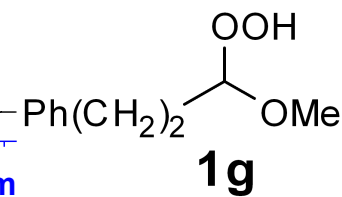



Current Data Parameters  
NAME TFish0452\_product\_dry\_062909  
EXPNO 2  
PROCNO 1

F2 - Acquisition Parameters  
Date\_ 20090629  
Time\_ 12.15  
INSTRUM spect  
PROBHD 5 mm Multinucl  
PULPROG zgpg30  
TD 65536  
SOLVENT CDCl3  
NS 170  
DS 4  
SWH 23980.814 Hz  
FIDRES 0.365918 Hz  
AQ 1.3664756 sec  
RG 5160.6  
DW 20.850 usec  
DE 6.50 usec  
TE 295.2 K  
D1 2.00000000 sec  
D11 0.03000000 sec  
TD0 1

=====  
CHANNEL f1  
NUC1 13C  
P1 10.00 usec  
PL1 0.00 dB  
SFO1 100.6228298 MHz

=====  
CHANNEL f2  
CPDPRG2 waltz16  
NUC2 1H  
PCPD2 80.00 usec  
PL2 -2.50 dB  
PL12 13.62 dB  
PL13 13.62 dB  
SFO2 400.1316005 MHz

F2 - Processing parameters  
SI 32768  
SF 100.6127690 MHz  
WDW EM  
SSB 0  
LB 1.00 Hz  
GB 0  
PC 1.40

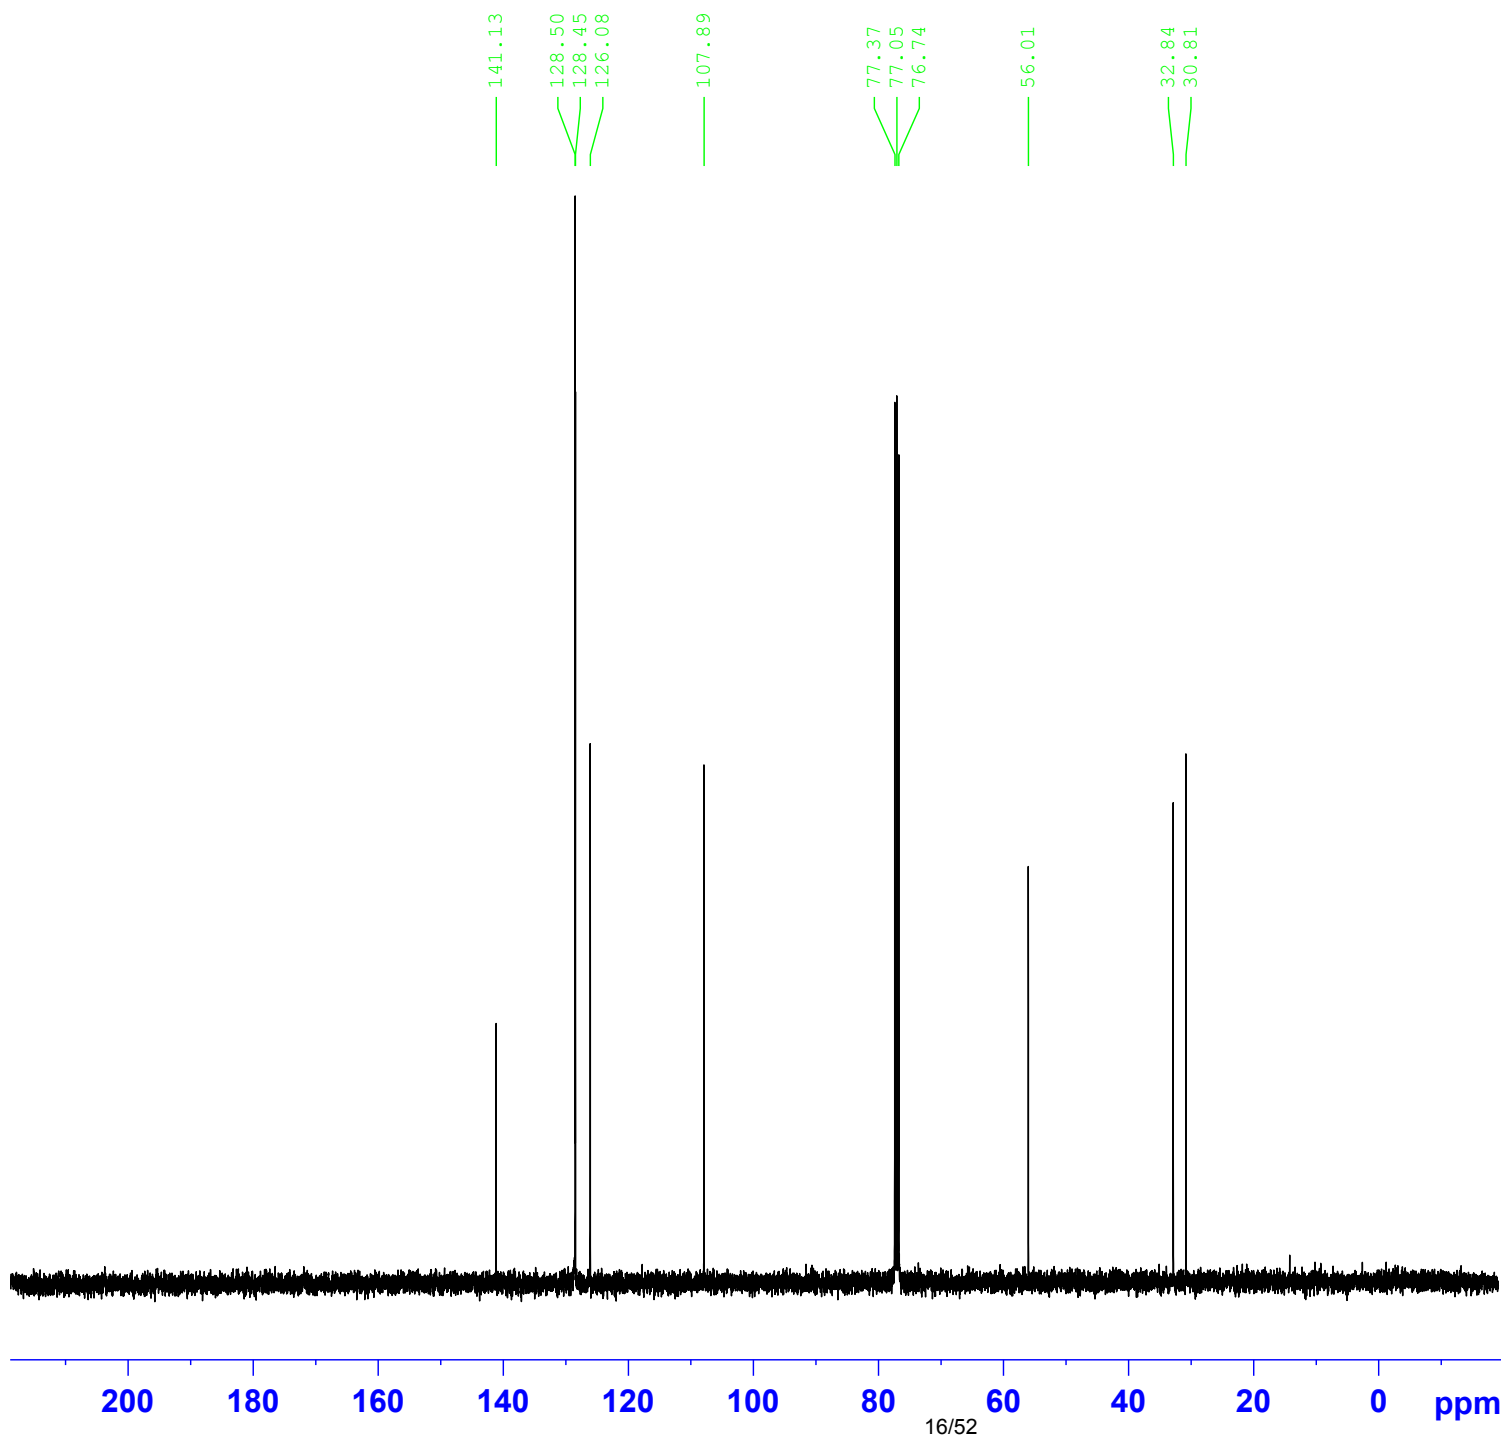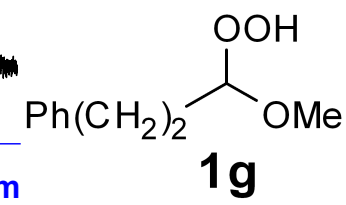



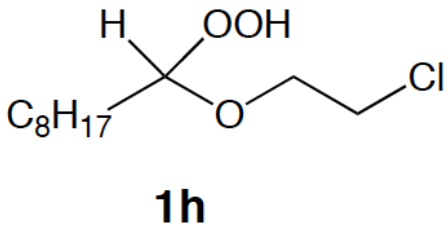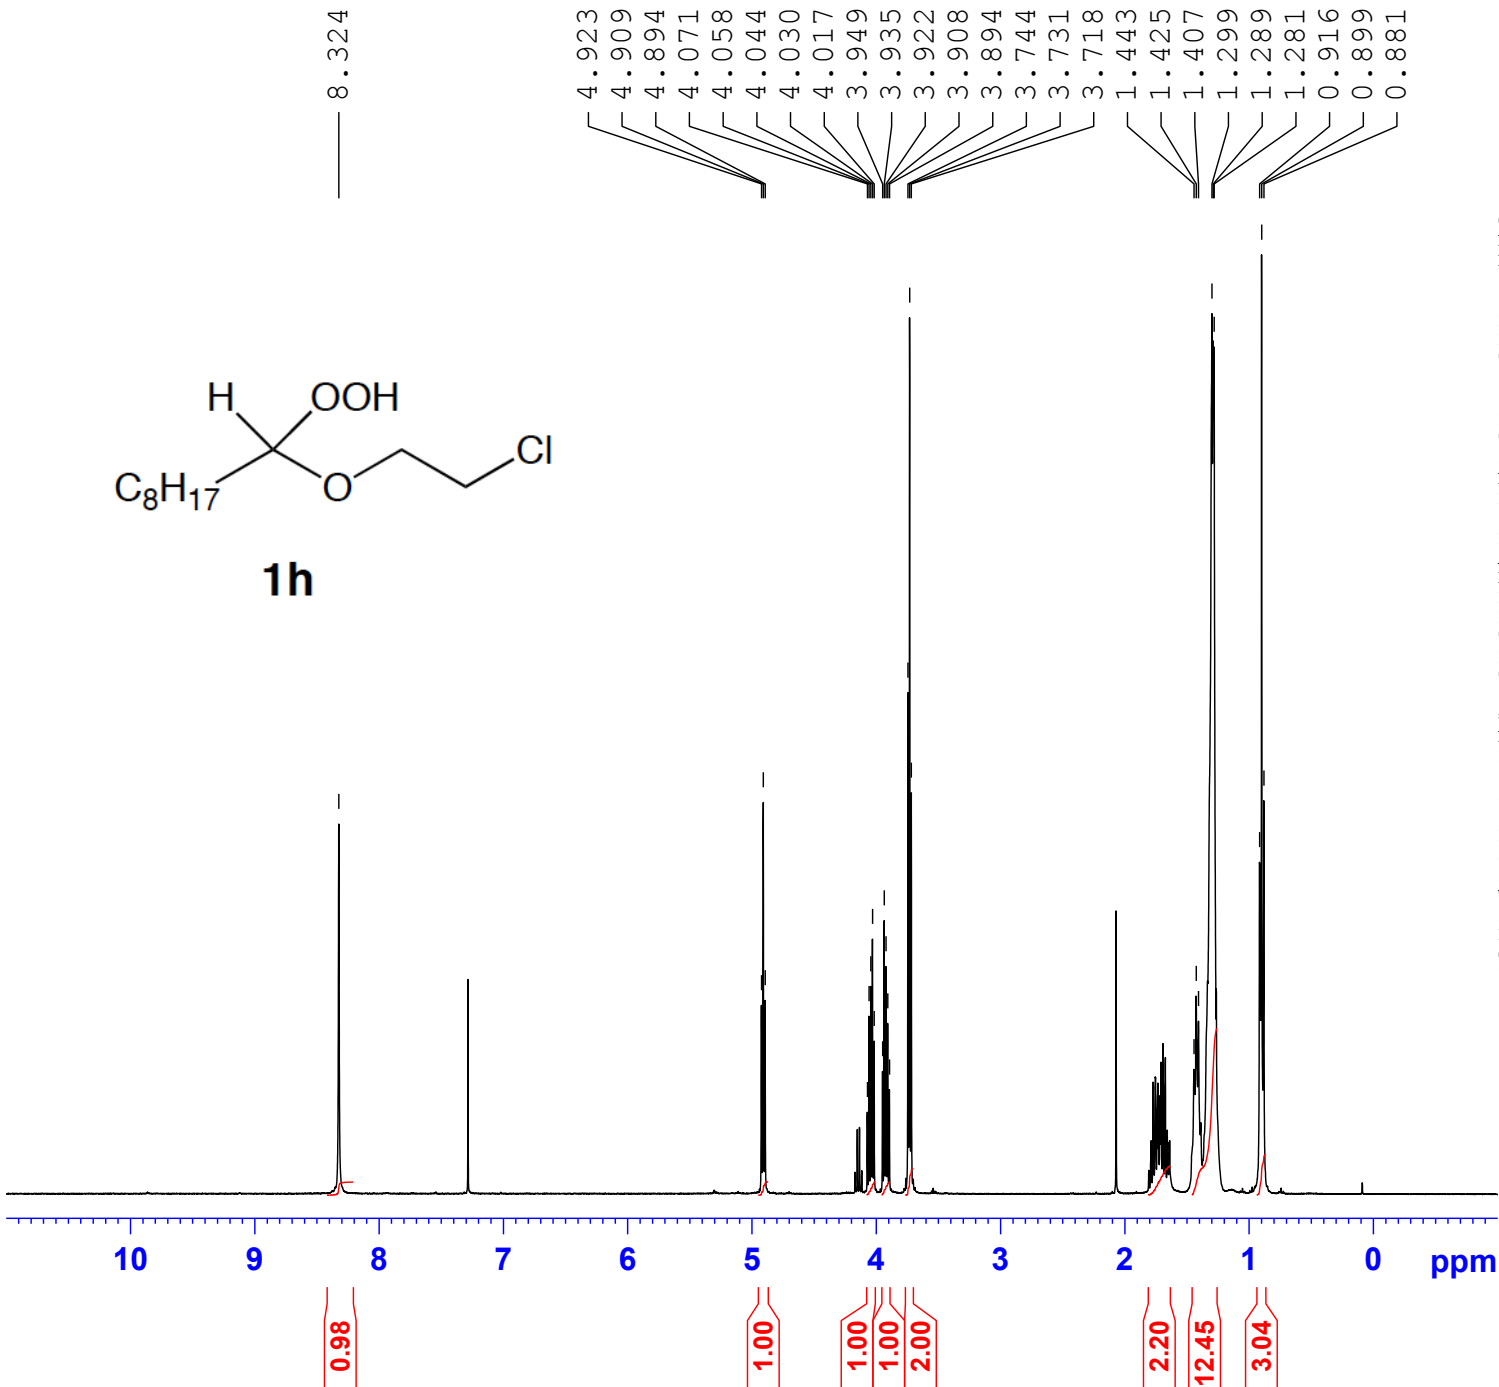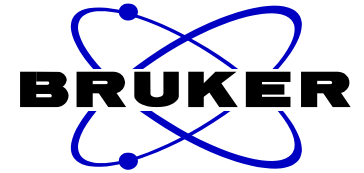

Current Data Parameters  
 NAME TFish0640\_product\_061010  
 EXPNO 1  
 PROCNO 1

F2 - Acquisition Parameters  
 Date\_ 20090611  
 Time\_ 12.56  
 INSTRUM spect  
 PROBHD 5 mm Multinucl  
 PULPROG zg30  
 TD 65536  
 SOLVENT CDCl3  
 NS 16  
 DS 2  
 SWH 8278.146 Hz  
 FIDRES 0.126314 Hz  
 AQ 3.9584243 sec  
 RG 90.5  
 DW 60.400 usec  
 DE 6.50 usec  
 TE 294.6 K  
 D1 1.00000000 sec  
 TD0 1

==== CHANNEL f1 =====  
 NUC1 1H  
 P1 12.50 usec  
 PL1 -2.50 dB  
 SFO1 400.1324710 MHz

F2 - Processing parameters  
 SI 32768  
 SF 400.1300000 MHz  
 WDW EM  
 SSB 0  
 LB 0.30 Hz  
 GB 0  
 PC 1.00



Current Data Parameters  
NAME TFish0640\_product\_061010  
EXPNO 2  
PROCNO 1

F2 - Acquisition Parameters  
Date\_ 20090611  
Time 12.41  
INSTRUM spect  
PROBHD 5 mm Multinucl  
PULPROG zgpg30  
TD 65536  
SOLVENT CDC13  
NS 158  
DS 4  
SWH 23980.814 Hz  
FIDRES 0.365918 Hz  
AQ 1.3664756 sec  
RG 5792.6  
DW 20.850 usec  
DE 6.50 usec  
TE 295.3 K  
D1 2.00000000 sec  
D11 0.03000000 sec  
TD0 1

=====  
CHANNEL f1  
NUC1 13C  
P1 10.00 usec  
PL1 0.00 dB  
SFO1 100.6228298 MHz

=====  
CHANNEL f2  
CPDPRG2 waltz16  
NUC2 1H  
PCPD2 80.00 usec  
PL2 -2.50 dB  
PL12 13.62 dB  
PL13 13.62 dB  
SFO2 400.1316005 MHz

F2 - Processing parameters  
SI 32768  
SF 100.6127690 MHz  
WDW EM  
SSB 0  
LB 1.00 Hz  
GB 0  
PC 1.40

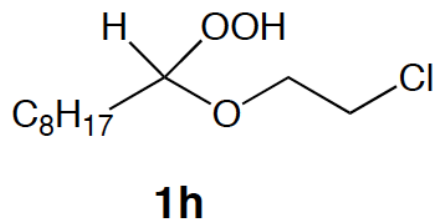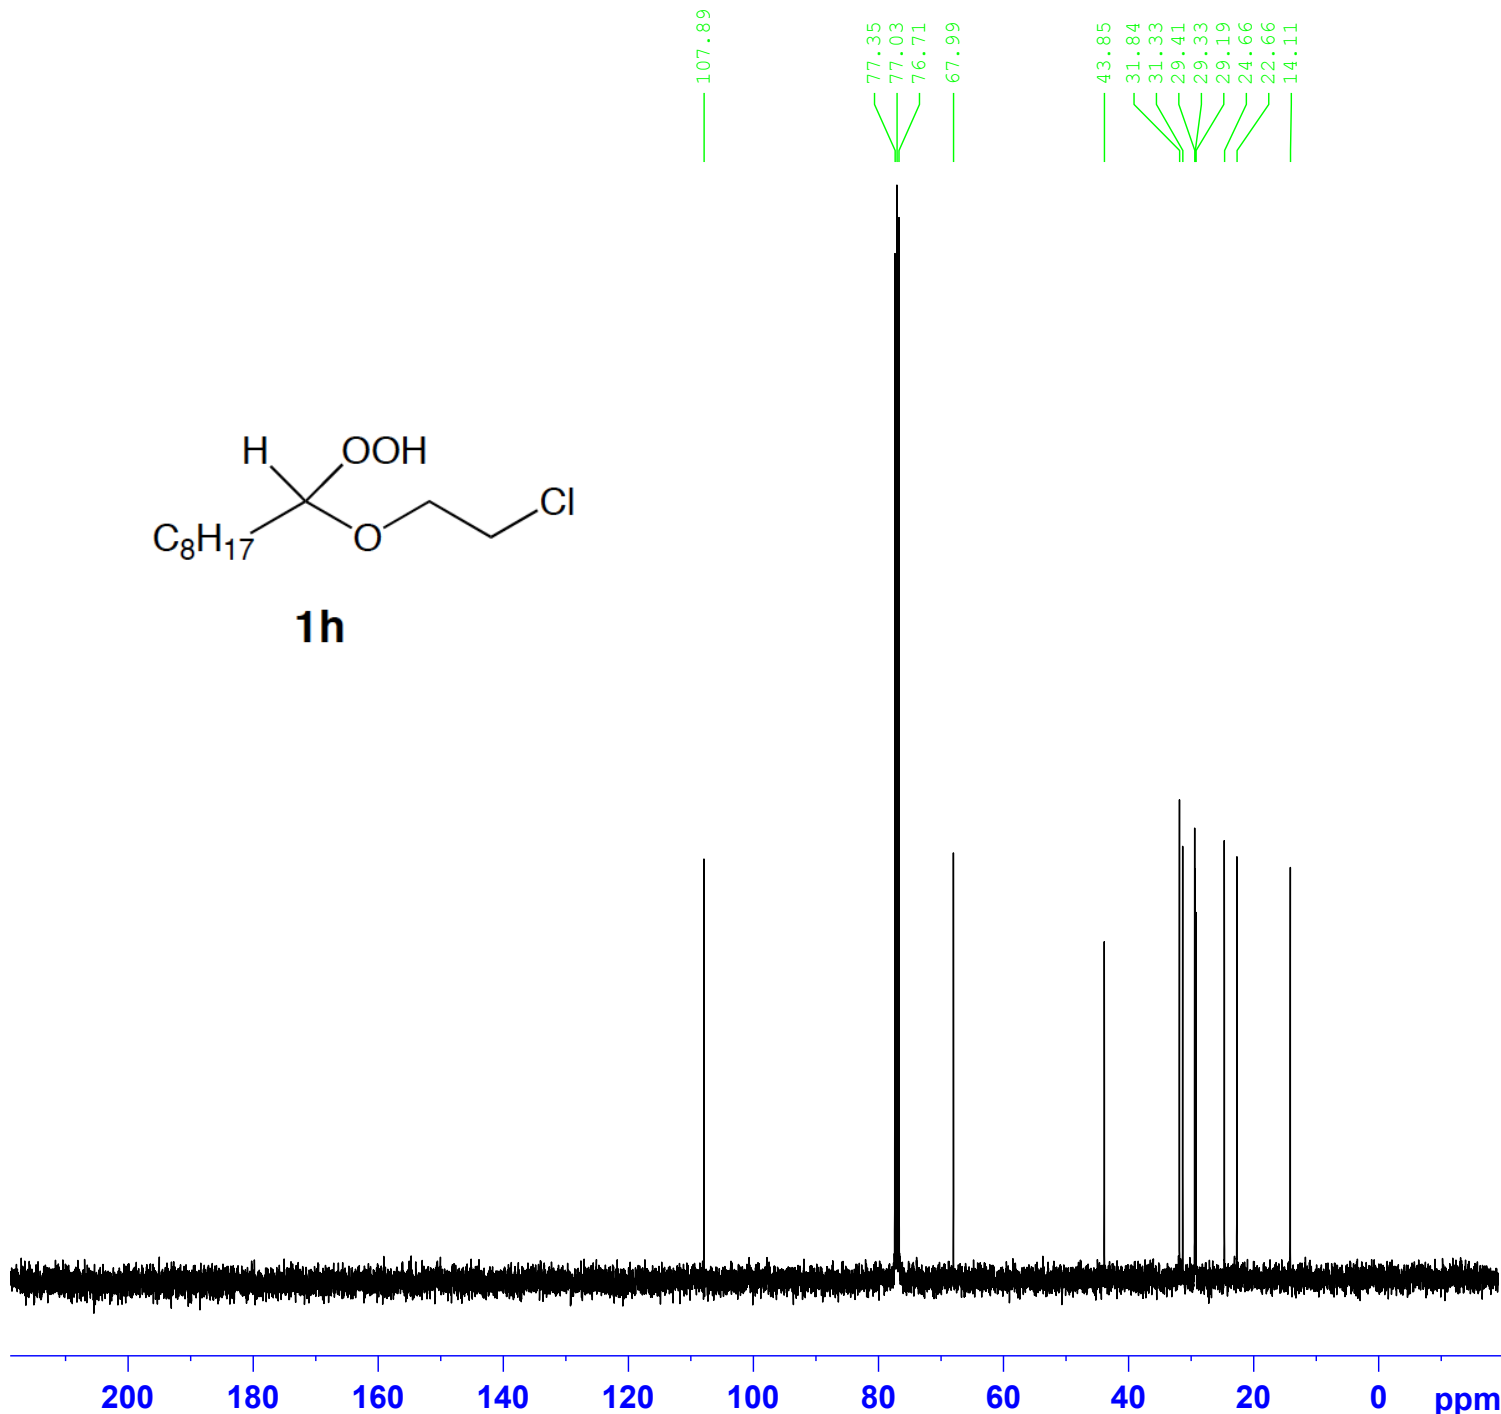

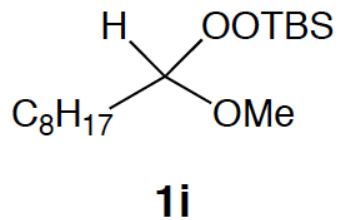

4.774  
 4.760  
 4.746  
 3.575  
 1.635  
 1.614  
 1.600  
 1.286  
 0.970  
 0.915  
 0.898  
 0.880  
 0.203  
 0.192



Current Data Parameters  
 NAME TFish0459\_Product\_063009  
 EXPNO 1  
 PROCNO 1

F2 - Acquisition Parameters  
 Date\_ 20090630  
 Time\_ 19.58  
 INSTRUM spect  
 PROBHD 5 mm Multinucl  
 PULPROG zg30  
 TD 65536  
 SOLVENT CDC13  
 NS 16  
 DS 2  
 SWH 8278.146 Hz  
 FIDRES 0.126314 Hz  
 AQ 3.9584243 sec  
 RG 71.8  
 DW 60.400 usec  
 DE 6.50 usec  
 TE 295.5 K  
 D1 1.00000000 sec  
 TD0 1

===== CHANNEL f1 =====  
 NUC1 1H  
 P1 12.50 usec  
 PL1 -2.50 dB  
 SFO1 400.1324710 MHz

F2 - Processing parameters  
 SI 32768  
 SF 400.1300000 MHz  
 WDW EM  
 SSB 0  
 LB 0.30 Hz  
 GB 0PC

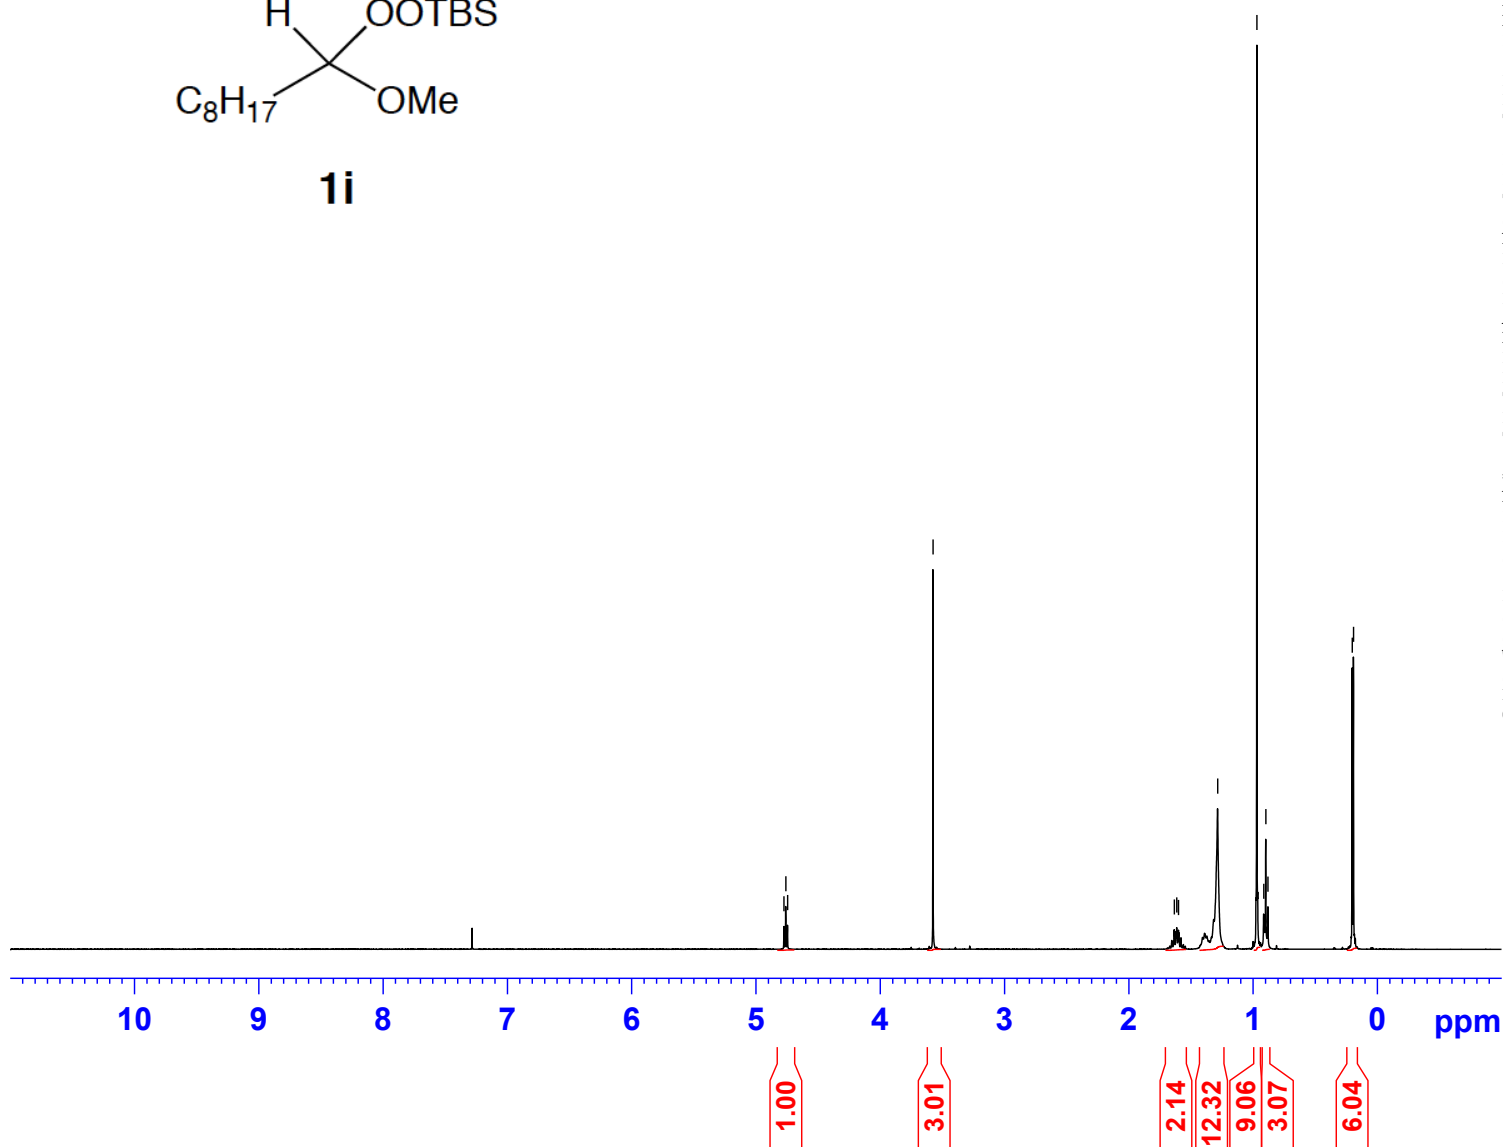

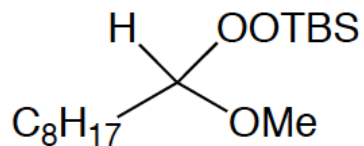

**1i**

109.11  
 77.34  
 77.02  
 76.70  
 57.18  
 32.06  
 31.85  
 29.43  
 29.20  
 26.17  
 24.76  
 22.67  
 18.17  
 14.11  
 -5.68  
 -5.70



Current Data Parameters  
 NAME TFish0459\_Product\_063009  
 EXPNO 2  
 PROCNO 1

F2 - Acquisition Parameters  
 Date\_ 20090630  
 Time\_ 20.02  
 INSTRUM spect  
 PROBHD 5 mm Multinucl  
 PULPROG zgpg30  
 TD 65536  
 SOLVENT CDCl3  
 NS 165  
 DS 4  
 SWH 23980.814 Hz  
 FIDRES 0.365918 Hz  
 AQ 1.3664756 sec  
 RG 4597.6  
 DW 20.850 usec  
 DE 6.50 usec  
 TE 295.8 K  
 D1 2.00000000 sec  
 D11 0.03000000 sec  
 TD0 1

==== CHANNEL f1 =====  
 NUC1 13C  
 P1 10.00 usec  
 PL1 0.00 dB  
 SFO1 100.6228298 MHz

==== CHANNEL f2 =====  
 CPDPRG2 waltz16  
 NUC2 1H  
 PCPD2 80.00 usec  
 PL2 -2.50 dB  
 PL12 13.62 dB  
 PL13 13.62 dB  
 SFO2 400.1316005 MHz

F2 - Processing parameters  
 SI 32768  
 SF 100.6127690 MHz  
 WDW EM  
 SSB 0  
 LB 1.00 Hz  
 GB 0  
 PC 1.40

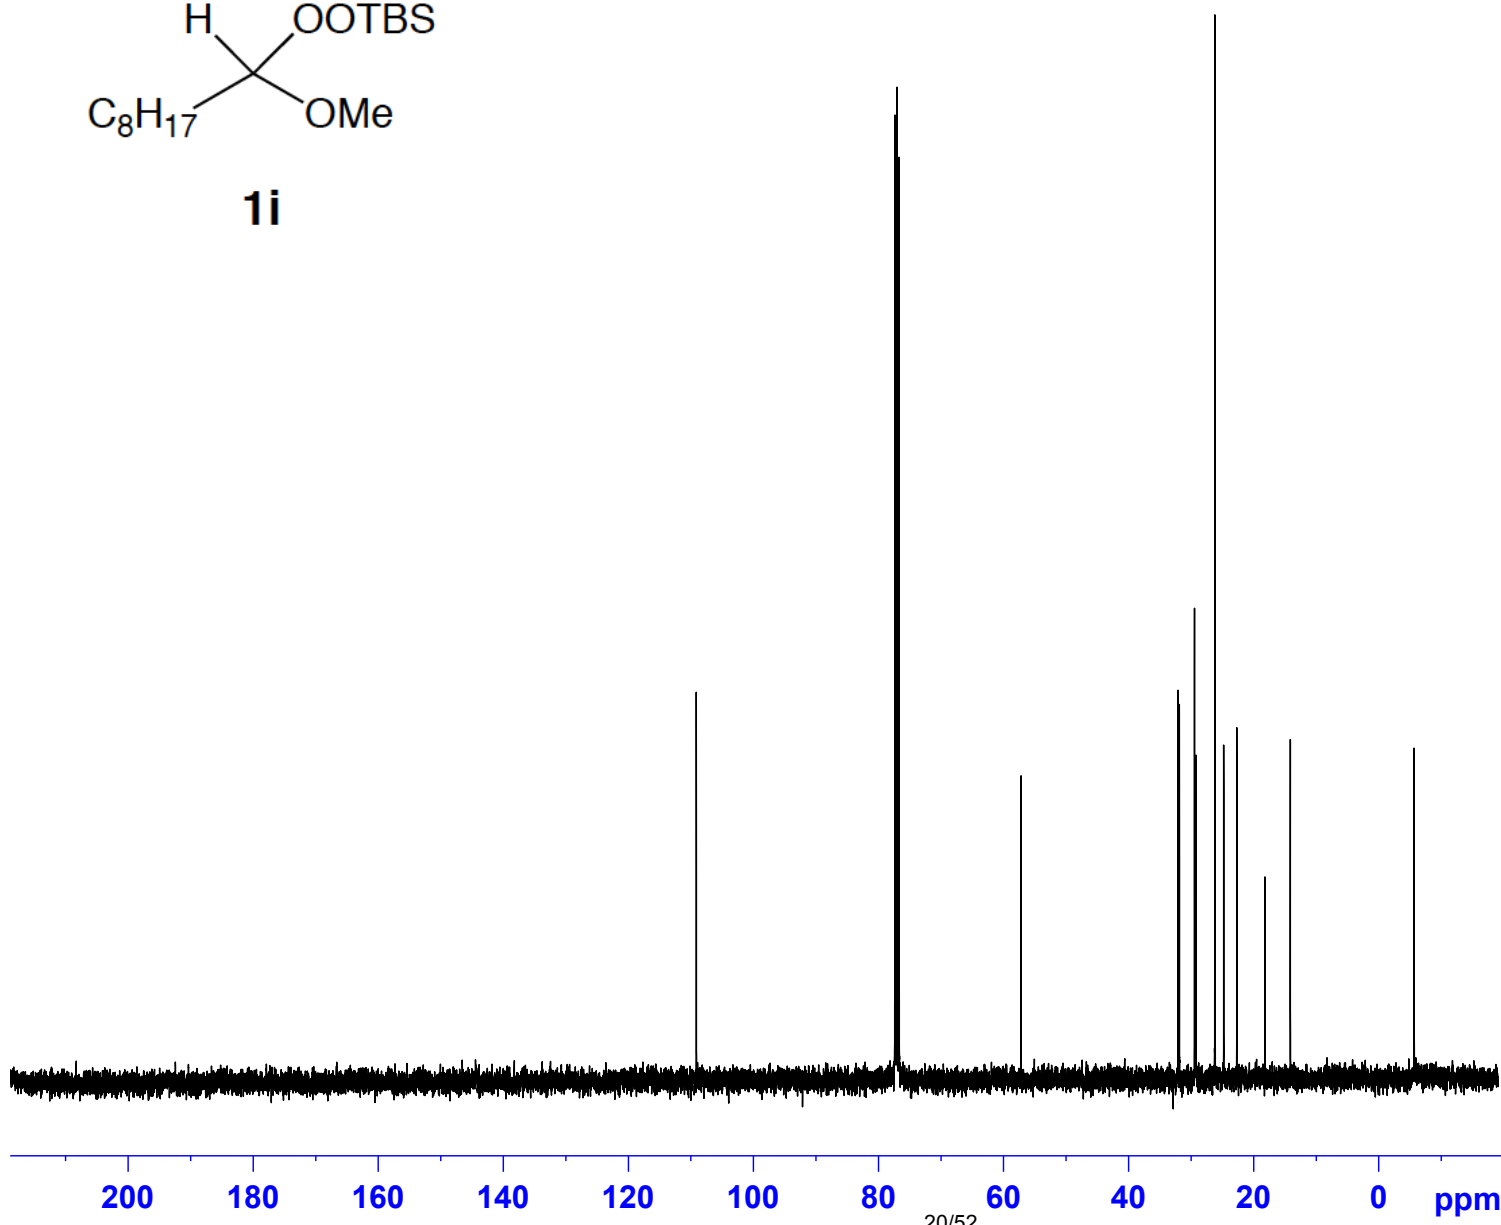

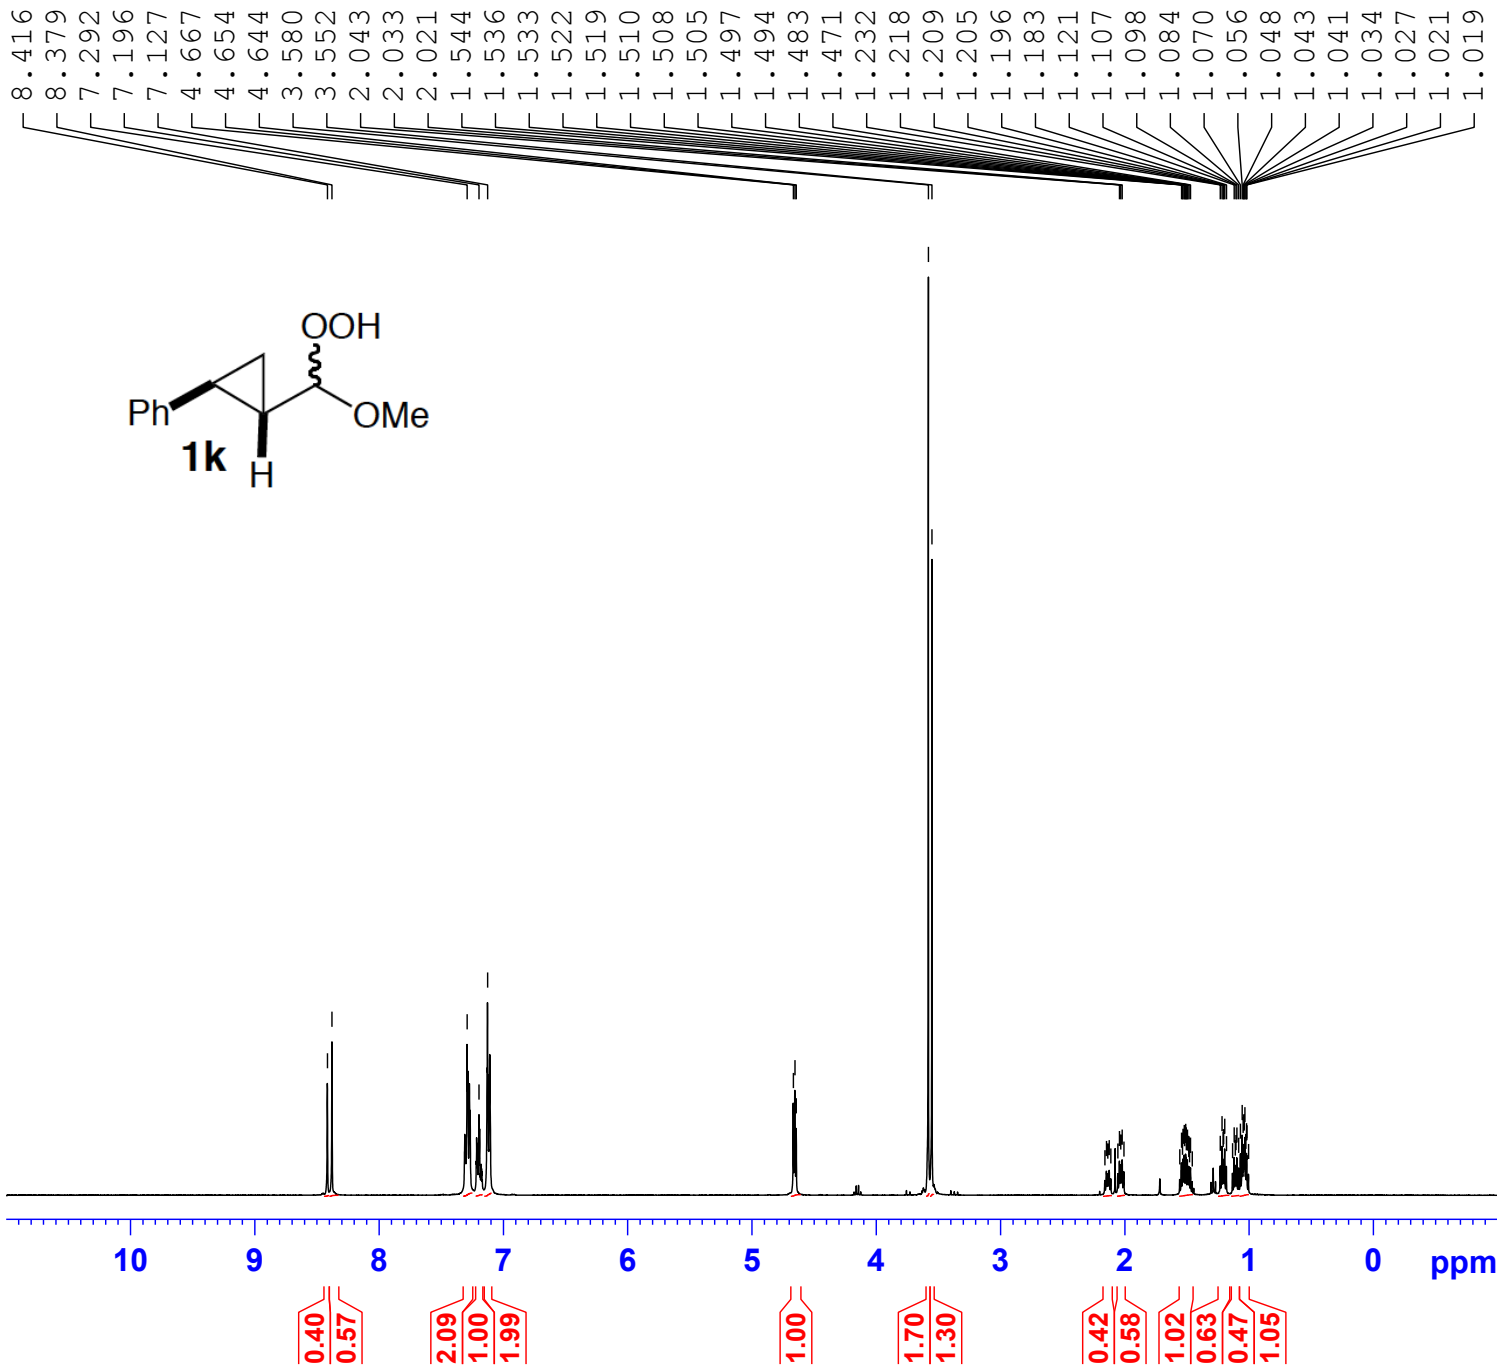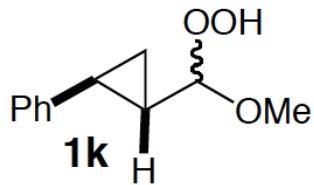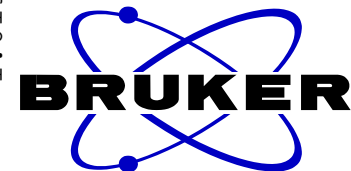

Current Data Parameters  
 NAME TFish0529\_product\_111409  
 EXPNO 1  
 PROCNO 1

F2 - Acquisition Parameters  
 Date\_ 20091114  
 Time\_ 17.54  
 INSTRUM spect  
 PROBHD 5 mm QNP 1H/13  
 PULPROG zg30  
 TD 65536  
 SOLVENT CDC13  
 NS 16  
 DS 2  
 SWH 8278.146 Hz  
 FIDRES 0.126314 Hz  
 AQ 3.9584243 sec  
 RG 90.5  
 DW 60.400 usec  
 DE 6.50 usec  
 TE 293.9 K  
 D1 1.00000000 sec  
 TD0 1

===== CHANNEL f1 =====  
 NUC1 1H  
 P1 12.00 usec  
 PL1 -3.35 dB  
 SFO1 400.1324710 MHz

F2 - Processing parameters  
 SI 32768  
 SF 400.1300000 MHz  
 WDW EM  
 SSB 0  
 LB 0.30 Hz  
 GB 0  
 PC 1.00



Current Data Parameters  
NAME TFish0529\_product\_111409  
EXPNO 2  
PROCNO 1

F2 - Acquisition Parameters  
Date\_ 20091114  
Time 18.03  
INSTRUM spect  
PROBHD 5 mm QNP 1H/13  
PULPROG zgpg30  
TD 65536  
SOLVENT CDC13  
NS 232  
DS 4  
SWH 23980.814 Hz  
FIDRES 0.365918 Hz  
AQ 1.3664756 sec  
RG 1024  
DW 20.850 usec  
DE 6.50 usec  
TE 295.1 K  
D1 2.00000000 sec  
D11 0.03000000 sec  
TD0 1

===== CHANNEL f1 =====  
NUC1 13C  
P1 10.00 usec  
PL1 0.50 dB  
SFO1 100.6228298 MHz

===== CHANNEL f2 =====  
CPDPRG2 waltz16  
NUC2 1H  
PCPD2 70.00 usec  
PL2 -3.35 dB  
PL12 11.97 dB  
PL13 11.97 dB  
SFO2 400.1316005 MHz

F2 - Processing parameters  
SI 32768  
SF 100.6127690 MHz  
WDW EM  
SSB 0  
LB 1.00 Hz  
GB 0  
PC 1.40

141.50  
141.48  
128.40  
126.14  
125.97  
125.95  
109.24  
109.15  
56.15  
55.93  
22.85  
22.81  
19.75  
19.68  
12.12  
11.85

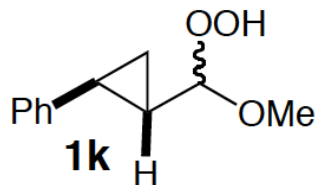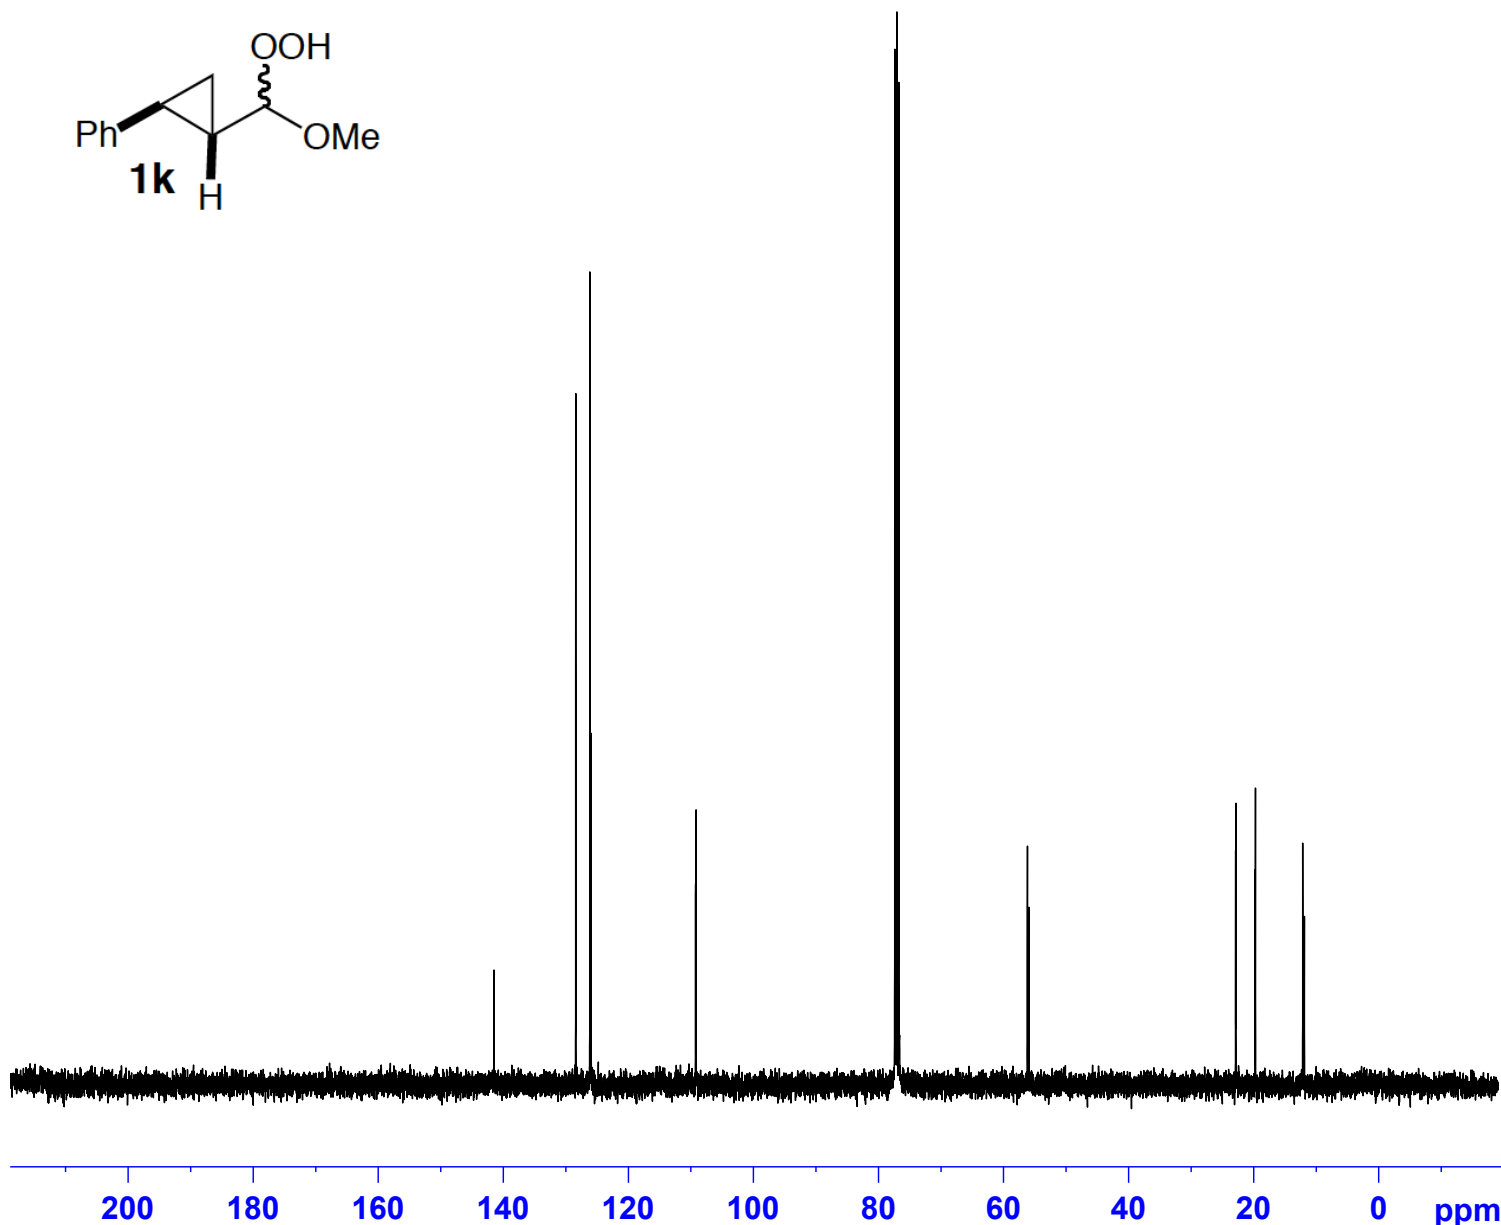



Current Data Parameters  
NAME TFish0514\_product\_091109  
EXPNO 1  
PROCNO 1

F2 - Acquisition Parameters  
Date\_ 20090911  
Time\_ 20.50  
INSTRUM spect  
PROBHD 5 mm QNP 1H/13  
PULPROG zg30  
TD 65536  
SOLVENT CDC13  
NS 16  
DS 2  
SWH 8278.146 Hz  
FIDRES 0.126314 Hz  
AQ 3.9584243 sec  
RG 128  
DW 60.400 usec  
DE 6.50 usec  
TE 293.9 K  
D1 1.00000000 sec  
TD0 1

==== CHANNEL f1 =====  
NUC1 1H  
P1 12.00 usec  
PL1 -3.35 dB  
SFO1 400.1324710 MHz

F2 - Processing parameters  
SI 32768  
SF 400.1300000 MHz  
WDW EM  
SSB 0  
LB 0.30 Hz  
GB 0  
PC 1.00

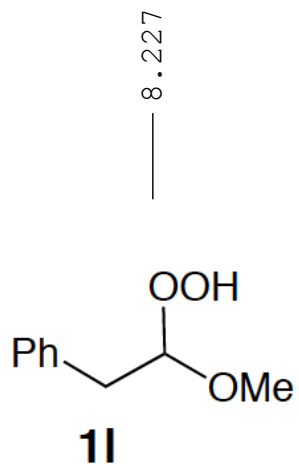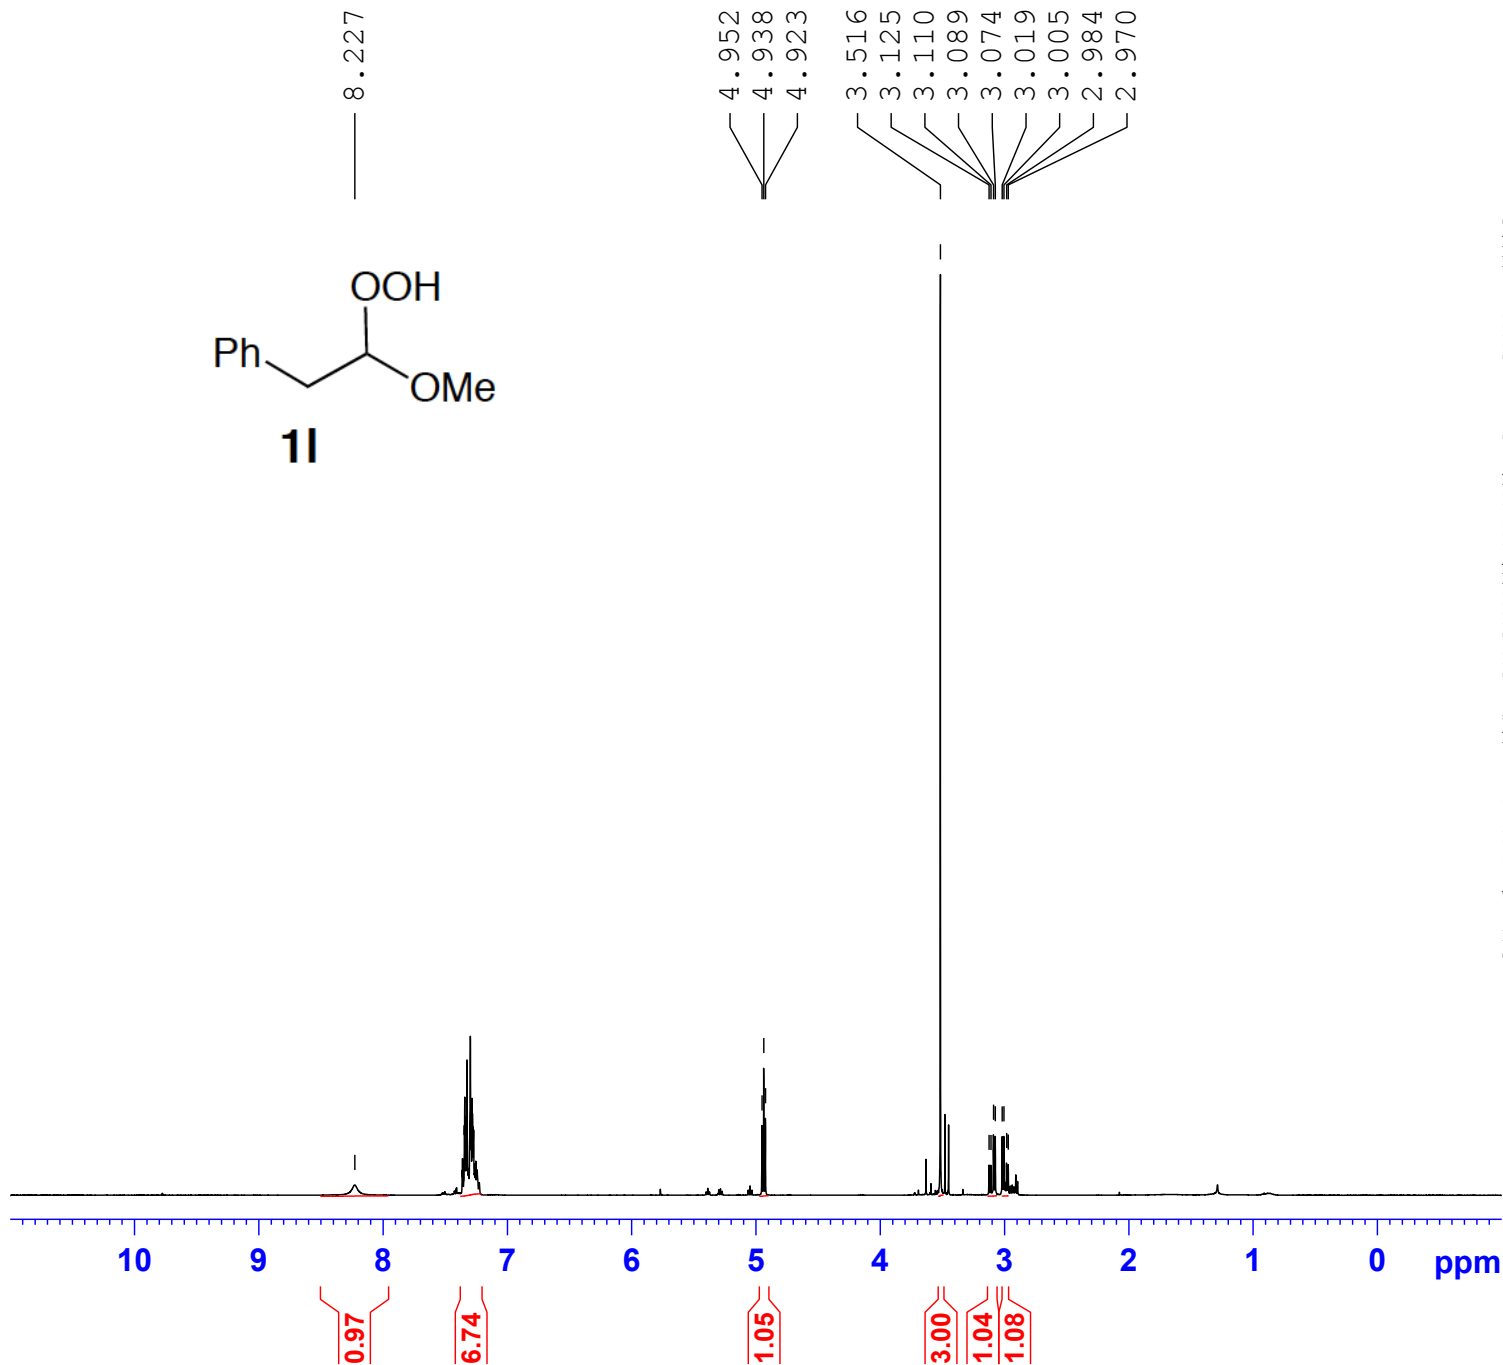

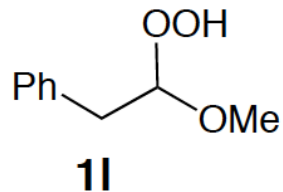

136.13  
 129.52  
 128.47  
 126.70  
 109.11  
 77.36  
 77.04  
 76.73  
 56.40  
 38.22



Current Data Parameters  
 NAME TFish0514\_product\_091109  
 EXPNO 2  
 PROCNO 1

F2 - Acquisition Parameters  
 Date\_ 20090911  
 Time 20.57  
 INSTRUM spect  
 PROBHD 5 mm QNP 1H/13  
 PULPROG zgpg30  
 TD 65536  
 SOLVENT CDC13  
 NS 94  
 DS 4  
 SWH 23980.814 Hz  
 FIDRES 0.365918 Hz  
 AQ 1.3664756 sec  
 RG 1024  
 DW 20.850 usec  
 DE 6.50 usec  
 TE 294.8 K  
 D1 2.00000000 sec  
 D11 0.03000000 sec  
 TD0 1

===== CHANNEL f1 =====  
 NUC1 13C  
 P1 10.00 usec  
 PL1 0.00 dB  
 SFO1 100.6228298 MHz

===== CHANNEL f2 =====  
 CPDPRG2 waltz16  
 NUC2 1H  
 PCPD2 70.00 usec  
 PL2 -3.35 dB  
 PL12 11.97 dB  
 PL13 11.97 dB  
 SFO2 400.1316005 MHz

F2 - Processing parameters  
 SI 32768  
 SF 100.6127690 MHz  
 WDW EM  
 SSB 0  
 LB 1.00 Hz  
 GB 0  
 PC 1.40

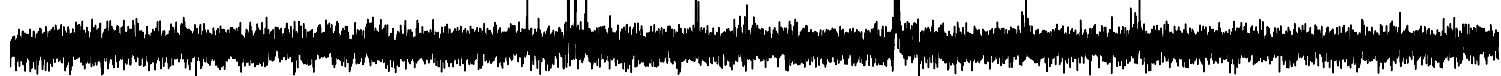

200 180 160 140 120 100 80 60 40 20 0 ppm





Current Data Parameters  
NAME TFish0587\_product\_031010  
EXPNO 1  
PROCNO 1

F2 - Acquisition Parameters  
Date\_ 20100310  
Time\_ 12.19  
INSTRUM spect  
PROBHD 5 mm QNP 1H/13  
PULPROG zg30  
TD 65536  
SOLVENT CDC13  
NS 16  
DS 2  
SWH 8278.146 Hz  
FIDRES 0.126314 Hz  
AQ 3.9584243 sec  
RG 90.5  
DW 60.400 usec  
DE 6.50 usec  
TE 298.0 K  
D1 1.00000000 sec  
TD0 1

==== CHANNEL f1 =====  
NUC1 1H  
P1 10.25 usec  
PL1 -3.35 dB  
SFO1 400.1324710 MHz

F2 - Processing parameters  
SI 131072  
SF 400.1300000 MHz  
WDW EM  
SSB 0  
LB 0.30 Hz  
GB 0  
PC 1.00

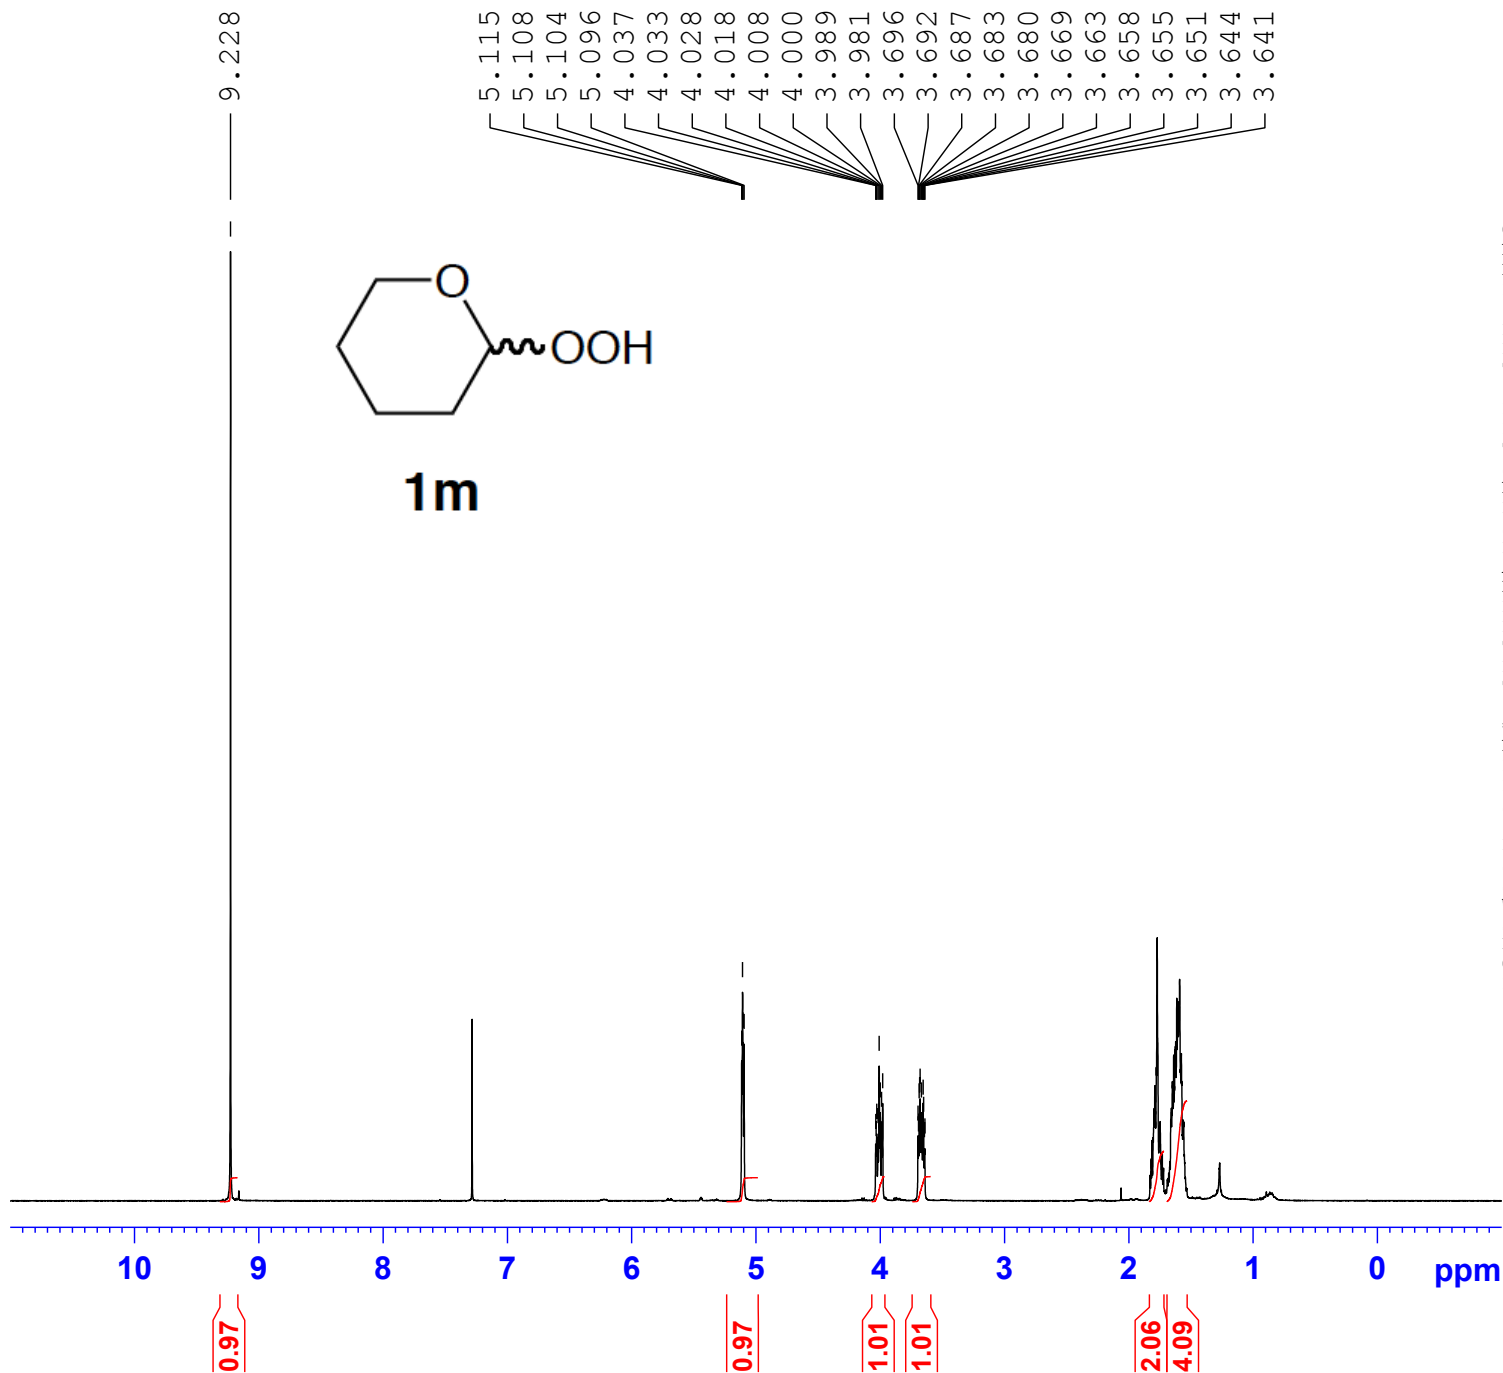

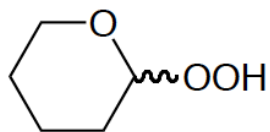

1m

102.58  
62.88  
27.35  
25.01  
19.58

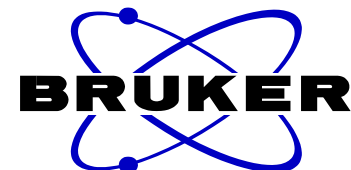

Current Data Parameters  
 NAME TFish0587\_product\_031010  
 EXPNO 2  
 PROCNO 1

F2 - Acquisition Parameters  
 Date\_ 20100310  
 Time 12.25  
 INSTRUM spect  
 PROBHD 5 mm QNP 1H/13  
 PULPROG zgpg30  
 TD 65536  
 SOLVENT CDC13  
 NS 82  
 DS 4  
 SWH 23980.814 Hz  
 FIDRES 0.365918 Hz  
 AQ 1.3664756 sec  
 RG 812.7  
 DW 20.850 usec  
 DE 6.50 usec  
 TE 298.0 K  
 D1 2.00000000 sec  
 D11 0.03000000 sec  
 TD0 1

===== CHANNEL f1 =====  
 NUC1 13C  
 P1 10.00 usec  
 PL1 0.50 dB  
 SFO1 100.6228298 MHz

===== CHANNEL f2 =====  
 CPDPRG2 waltz16  
 NUC2 1H  
 PCPD2 70.00 usec  
 PL2 -3.35 dB  
 PL12 13.34 dB  
 PL13 13.34 dB  
 SFO2 400.1316005 MHz

F2 - Processing parameters  
 SI 32768  
 SF 100.6127690 MHz  
 WDW EM  
 SSB 0  
 LB 1.00 Hz  
 GB 0  
 PC 1.40

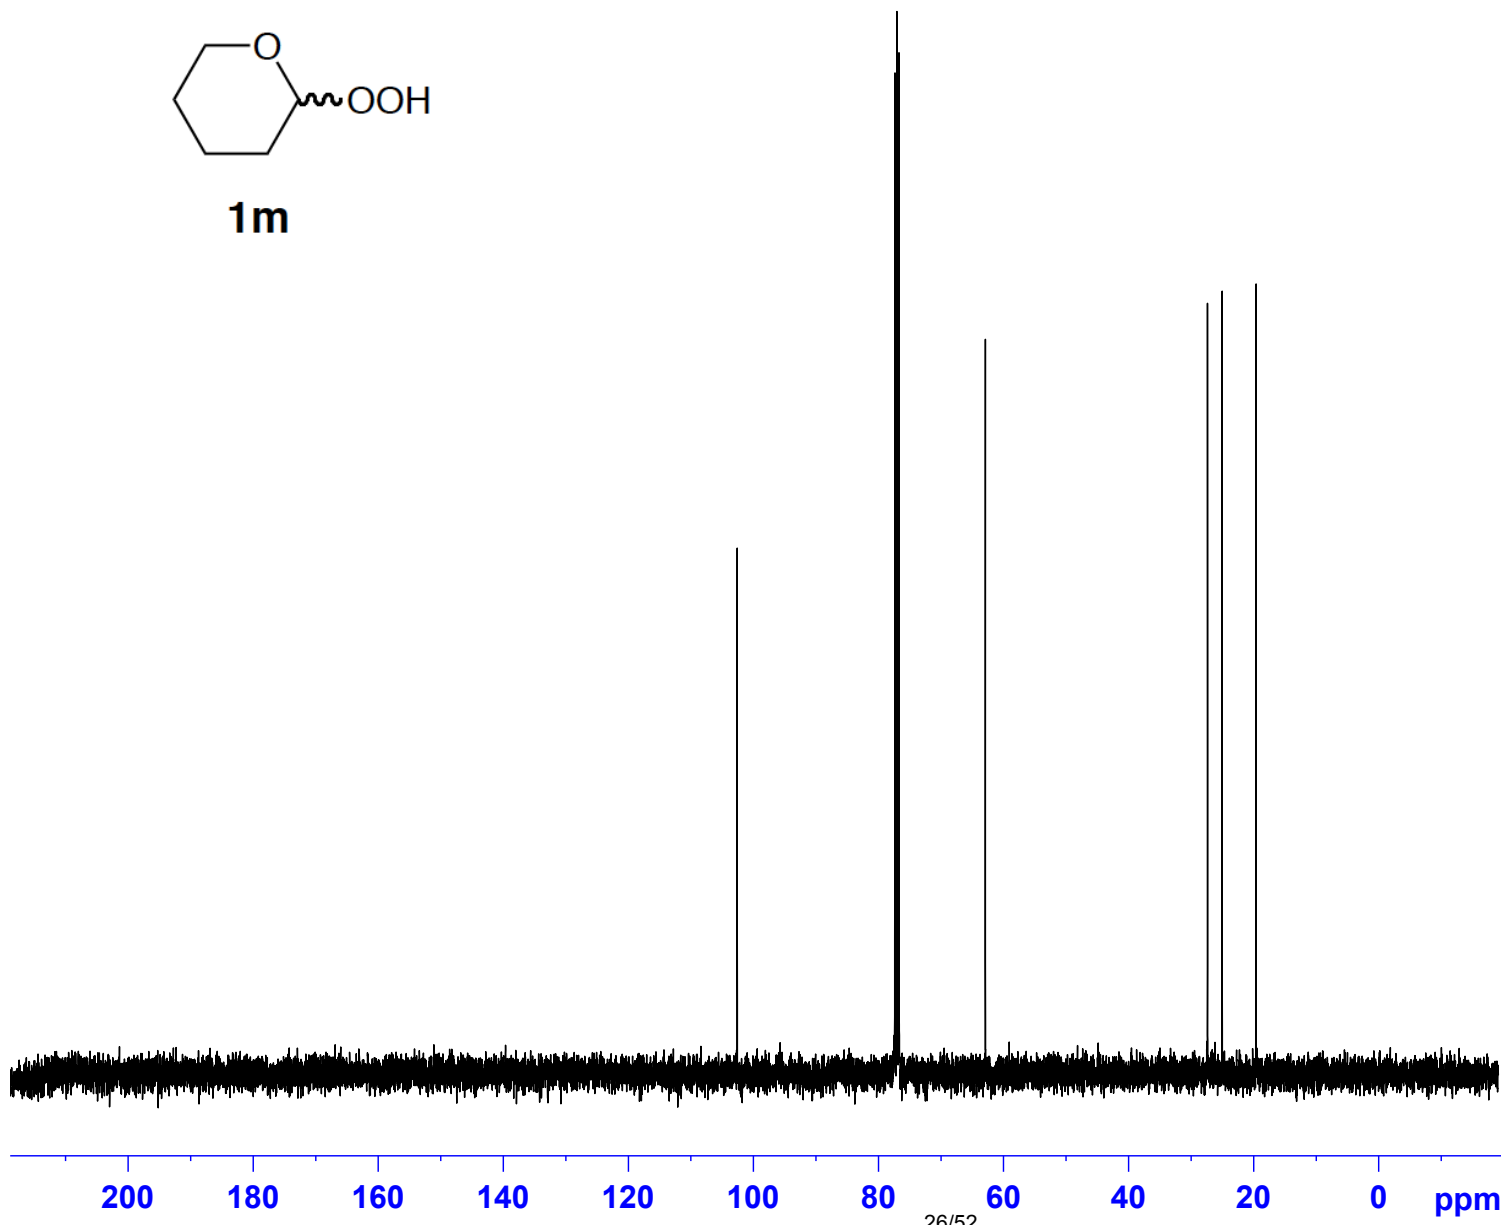

7.503  
7.478  
3.344  
3.308  
2.259  
2.251  
2.224  
2.216  
2.162  
2.154  
2.127  
2.124  
2.119  
2.111  
1.740  
1.734  
1.720  
1.708  
1.622  
1.423  
1.413  
1.406  
1.389  
1.379  
1.356  
1.346  
1.276  
1.241  
1.235  
1.210  
1.203  
1.178  
1.170  
1.145  
1.137  
1.091  
1.084  
1.076  
1.061  
1.054  
1.047  
1.041  
1.024  
0.887

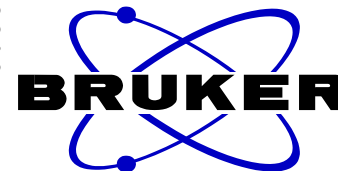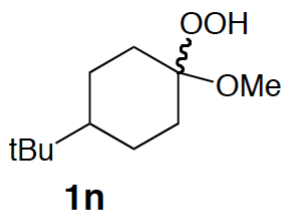

Current Data Parameters  
 NAME TFish0580\_product\_030310  
 EXPNO 1  
 PROCNO 1

F2 - Acquisition Parameters  
 Date\_ 20100303  
 Time\_ 19.46  
 INSTRUM spect  
 PROBHD 5 mm QNP 1H/13  
 PULPROG zg30  
 TD 65536  
 SOLVENT CDC13  
 NS 16  
 DS 2  
 SWH 8278.146 Hz  
 FIDRES 0.126314 Hz  
 AQ 3.9584243 sec  
 RG 90.5  
 DW 60.400 usec  
 DE 6.50 usec  
 TE 298.0 K  
 D1 1.00000000 sec  
 TD0 1

==== CHANNEL f1 =====  
 NUC1 1H  
 P1 12.00 usec  
 PL1 -3.35 dB  
 SFO1 400.1324710 MHz

F2 - Processing parameters  
 SI 65536  
 SF 400.1300000 MHz  
 WDW EM  
 SSB 0  
 LB 0.30 Hz  
 GB 0  
 PC 1.00

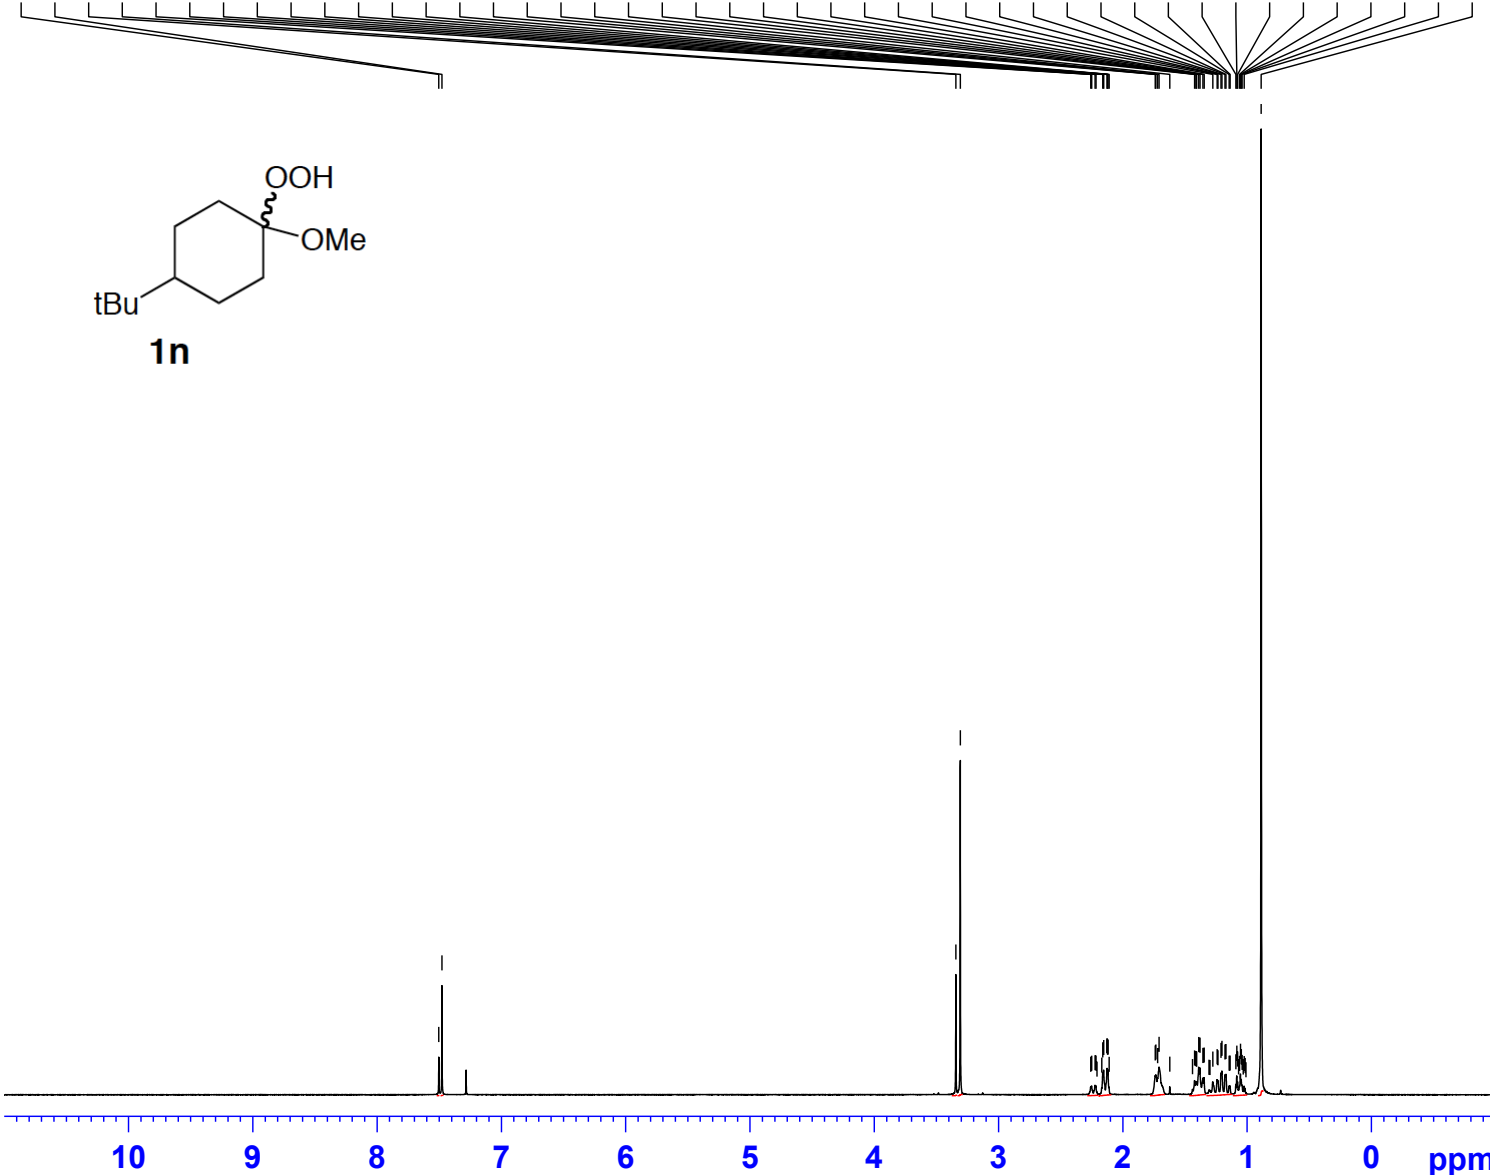

0.25  
0.68

0.79  
2.18

0.54  
1.52  
2.07  
2.12  
2.38  
1.14  
9.06

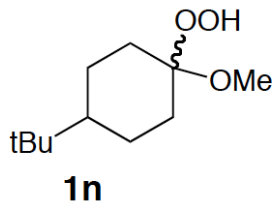

105.66  
105.38

48.52  
48.25  
47.57  
47.48

32.31  
31.47  
30.95  
27.63  
23.63  
23.41

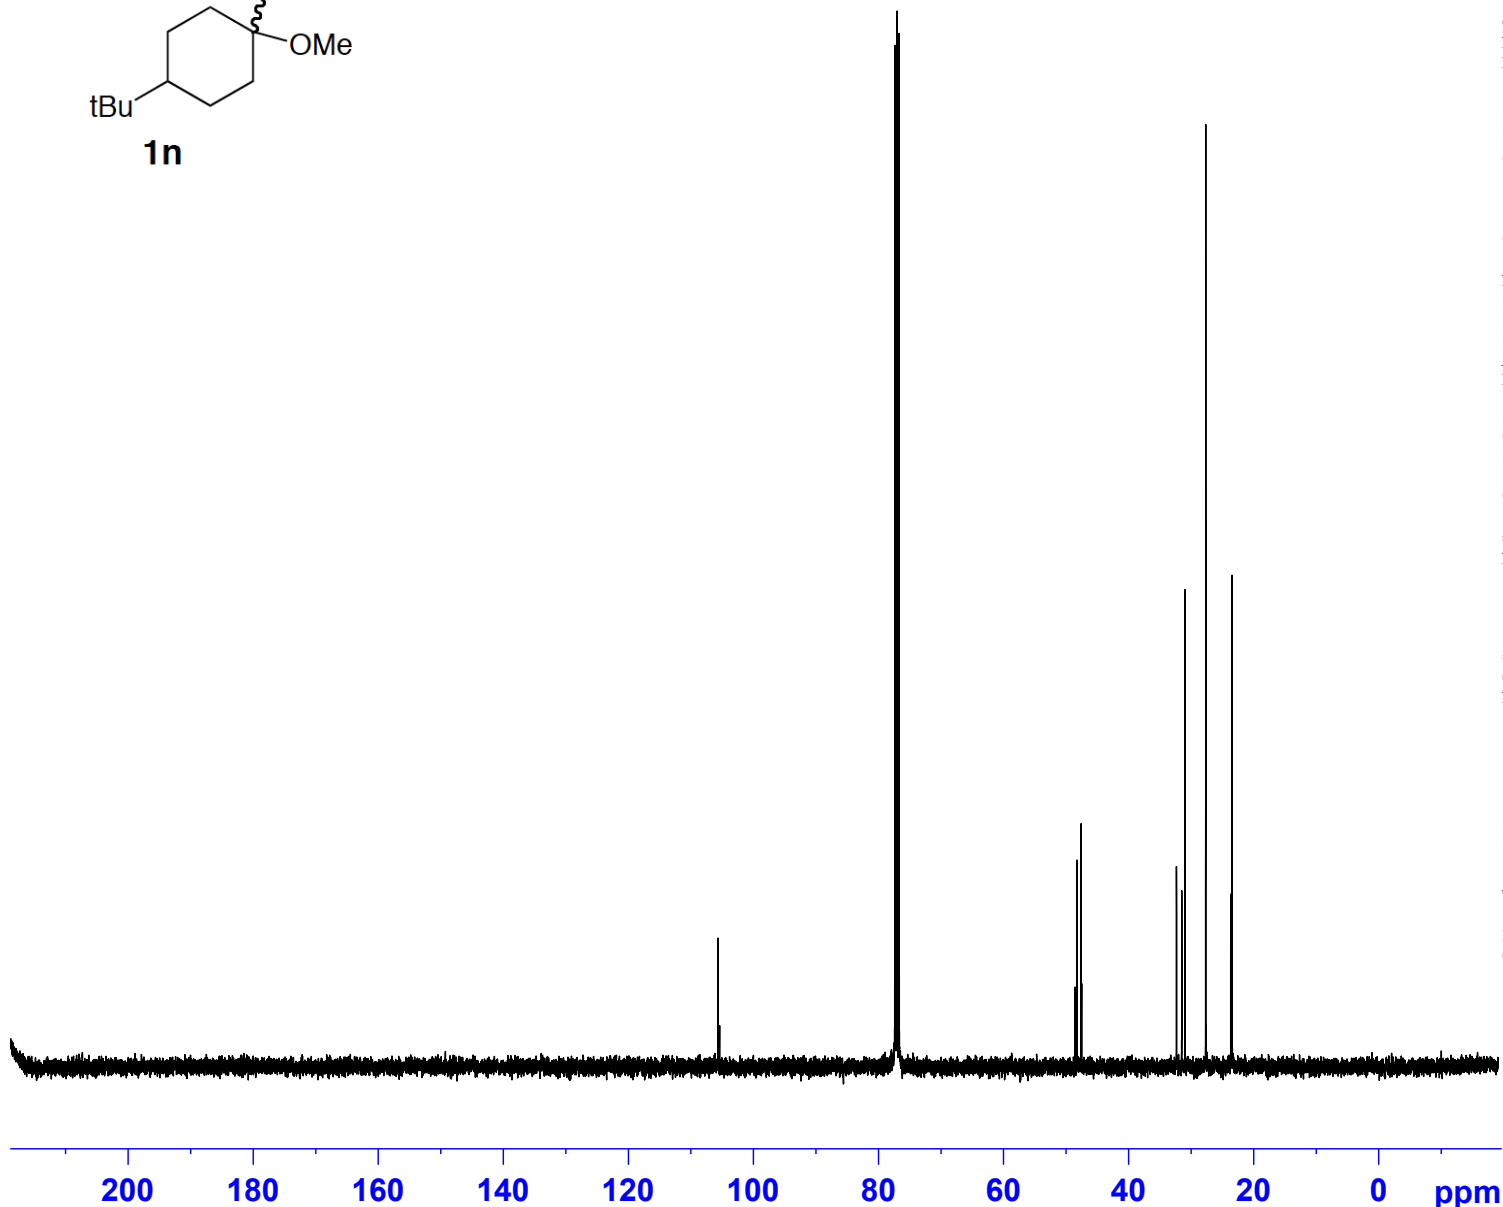

28/52



Current Data Parameters  
 NAME TFish0580\_product\_030310  
 EXPNO 2  
 PROCNO 1

F2 - Acquisition Parameters  
 Date\_ 20100303  
 Time\_ 19.56  
 INSTRUM spect  
 PROBHD 5 mm QNP 1H/13  
 PULPROG zgpg30  
 TD 65536  
 SOLVENT CDC13  
 NS 379  
 DS 4  
 SWH 23980.814 Hz  
 FIDRES 0.365918 Hz  
 AQ 1.3664756 sec  
 RG 1149.4  
 DW 20.850 usec  
 DE 6.50 usec  
 TE 298.0 K  
 D1 2.00000000 sec  
 D11 0.03000000 sec  
 TD0 1

===== CHANNEL f1 =====  
 NUC1 13C  
 P1 10.00 usec  
 PL1 0.50 dB  
 SFO1 100.6228298 MHz

===== CHANNEL f2 =====  
 CPDPRG2 waltz16  
 NUC2 1H  
 PCPD2 70.00 usec  
 PL2 -3.35 dB  
 PL12 11.97 dB  
 PL13 11.97 dB  
 SFO2 400.1316005 MHz

F2 - Processing parameters  
 SI 65536  
 SF 100.6127690 MHz  
 WDW EM  
 SSB 0  
 LB 1.00 Hz  
 GB 0  
 PC 1.40



Current Data Parameters  
NAME TFish0448\_crude\_062609  
EXPNO 1  
PROCNO 1

F2 - Acquisition Parameters  
Date\_ 20090626  
Time\_ 13.07  
INSTRUM spect  
PROBHD 5 mm Multinucl  
PULPROG zg30  
TD 65536  
SOLVENT CDC13  
NS 16  
DS 2  
SWH 8278.146 Hz  
FIDRES 0.126314 Hz  
AQ 3.9584243 sec  
RG 71.8  
DW 60.400 usec  
DE 6.50 usec  
TE 295.4 K  
D1 1.00000000 sec  
TD0 1

==== CHANNEL f1 =====  
NUC1 1H  
P1 12.50 usec  
PL1 -2.50 dB  
SFO1 400.1324710 MHz

F2 - Processing parameters  
SI 32768  
SF 400.130000 MHz  
WDW EM  
SSB 0  
LB 0.30 Hz  
GB 0  
PC 1.00

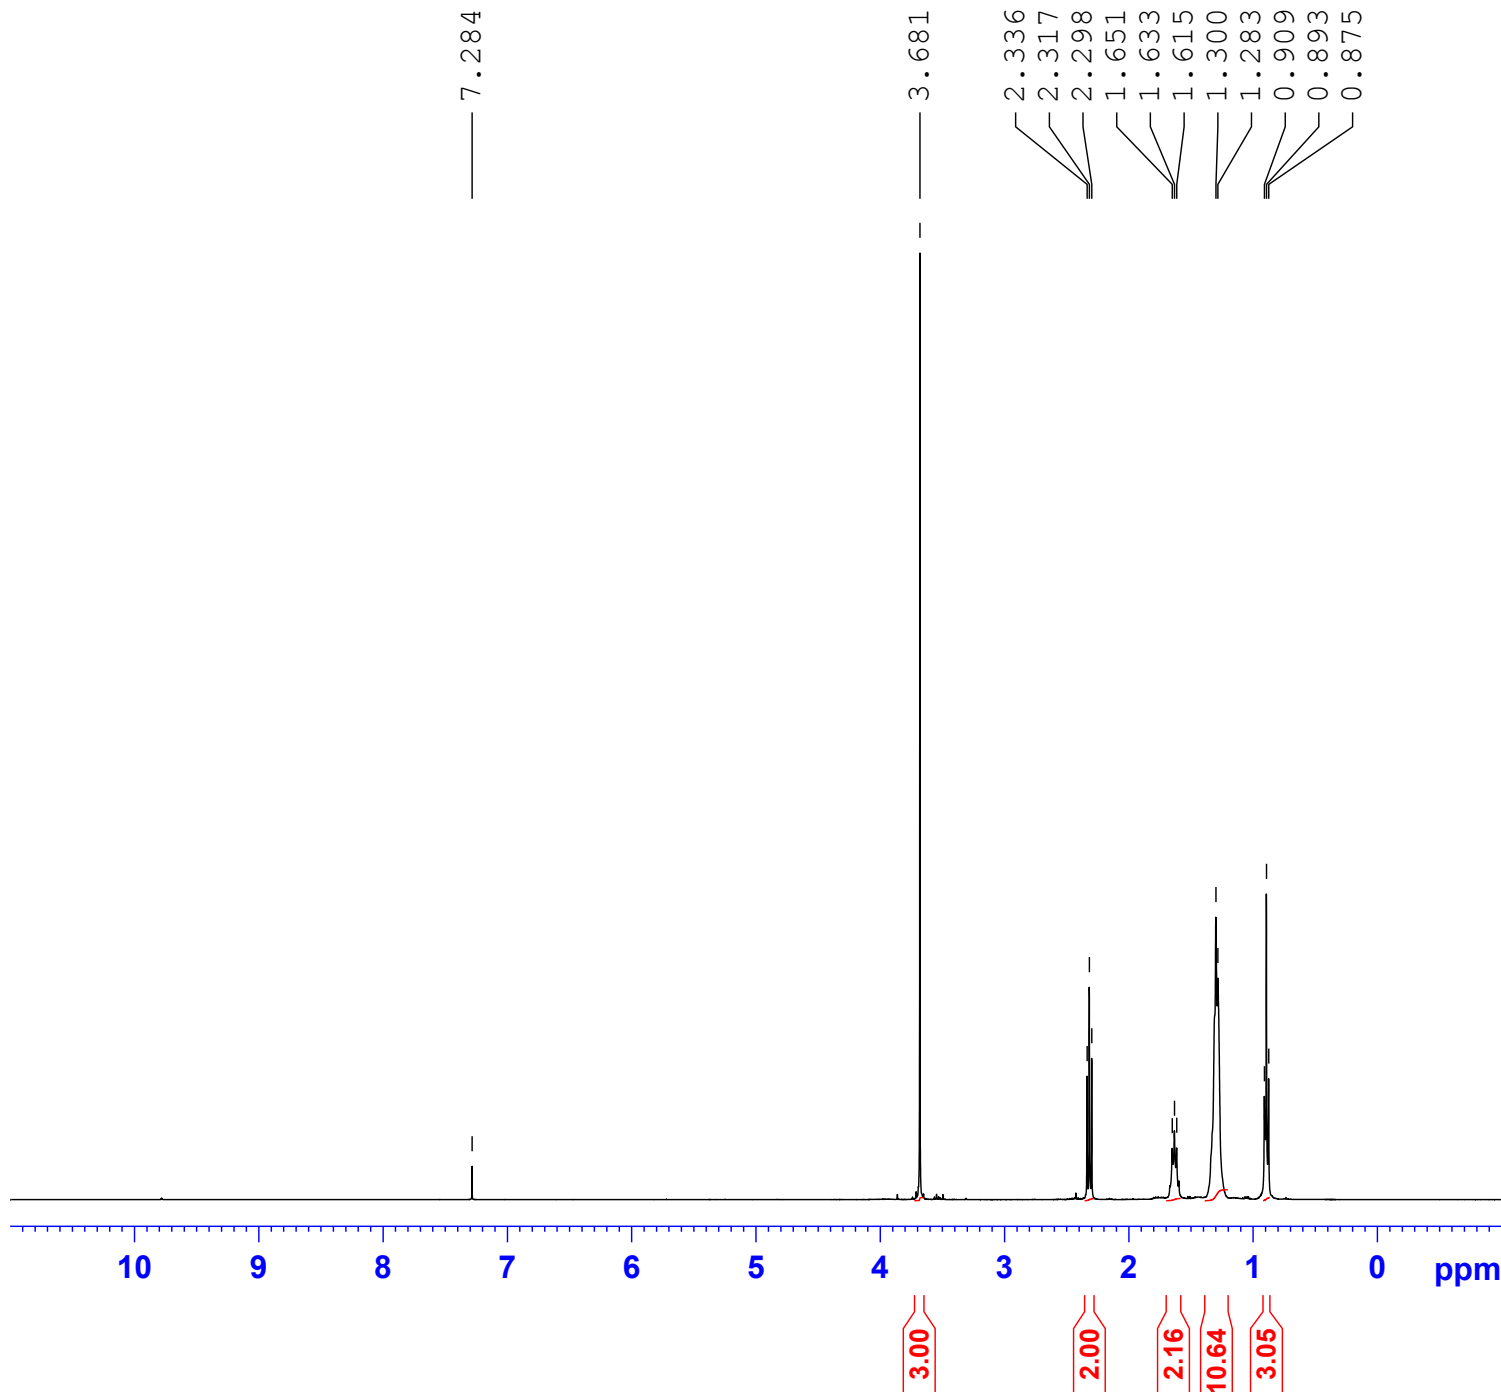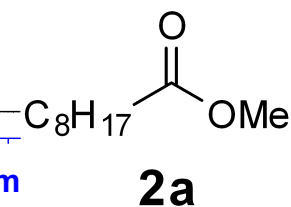



Current Data Parameters  
NAME TFish0448\_crude\_062609  
EXPNO 2  
PROCNO 1

F2 - Acquisition Parameters  
Date\_ 20090626  
Time\_ 13.11  
INSTRUM spect  
PROBHD 5 mm Multinucl  
PULPROG zgpg30  
TD 65536  
SOLVENT CDC13  
NS 117  
DS 4  
SWH 23980.814 Hz  
FIDRES 0.365918 Hz  
AQ 1.3664756 sec  
RG 4597.6  
DW 20.850 usec  
DE 6.50 usec  
TE 295.8 K  
D1 2.00000000 sec  
D11 0.03000000 sec  
TD0 1

==== CHANNEL f1 =====  
NUC1 13C  
P1 10.00 usec  
PL1 0.00 dB  
SFO1 100.6228298 MHz

==== CHANNEL f2 =====  
CPDPRG2 waltz16  
NUC2 1H  
PCPD2 80.00 usec  
PL2 -2.50 dB  
PL12 13.62 dB  
PL13 13.62 dB  
SFO2 400.1316005 MHz

F2 - Processing parameters  
SI 32768  
SF 100.6127690 MHz  
WDW EM  
SSB 0  
LB 1.00 Hz  
GB 0  
PC 1.40

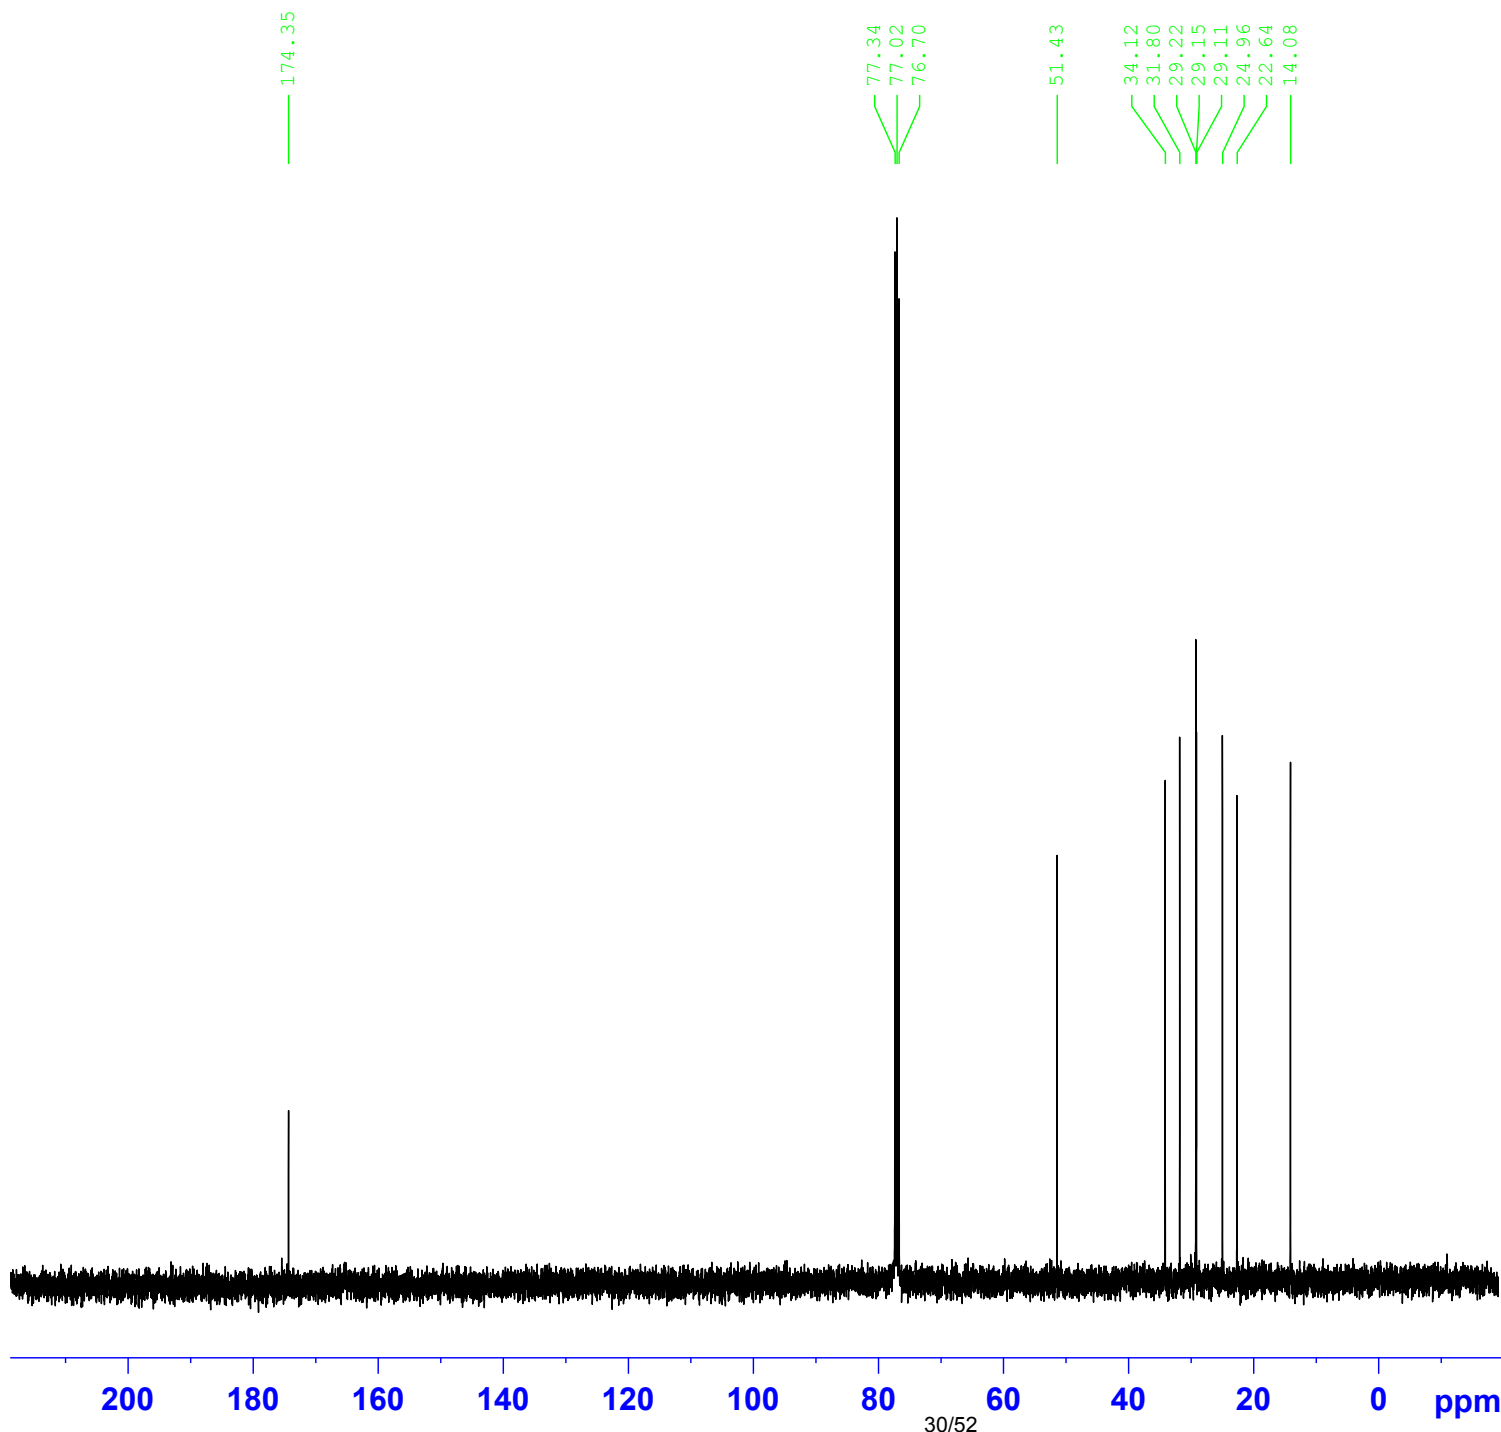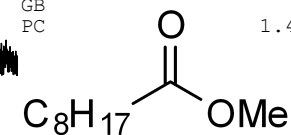

2a



Current Data Parameters  
NAME TFish0454\_crude\_063009  
EXPNO 1  
PROCNO 1

F2 - Acquisition Parameters  
Date\_ 20090630  
Time\_ 10.23  
INSTRUM spect  
PROBHD 5 mm Multinucl  
PULPROG zg30  
TD 65536  
SOLVENT CDC13  
NS 16  
DS 2  
SWH 8278.146 Hz  
FIDRES 0.126314 Hz  
AQ 3.9584243 sec  
RG 64  
DW 60.400 usec  
DE 6.50 usec  
TE 295.2 K  
D1 1.00000000 sec  
TD0 1

===== CHANNEL f1 =====  
NUC1 1H  
P1 12.50 usec  
PL1 -2.50 dB  
SFO1 400.1324710 MHz

F2 - Processing parameters  
SI 32768  
SF 400.130000 MHz  
WDW EM  
SSB 0  
LB 0.30 Hz  
GB 0  
PC 1.00

4.165  
4.147  
4.129  
4.111  
2.318  
2.300  
2.281  
1.649  
1.631  
1.612  
1.310  
1.300  
1.286  
1.269  
1.251  
0.909  
0.892  
0.875

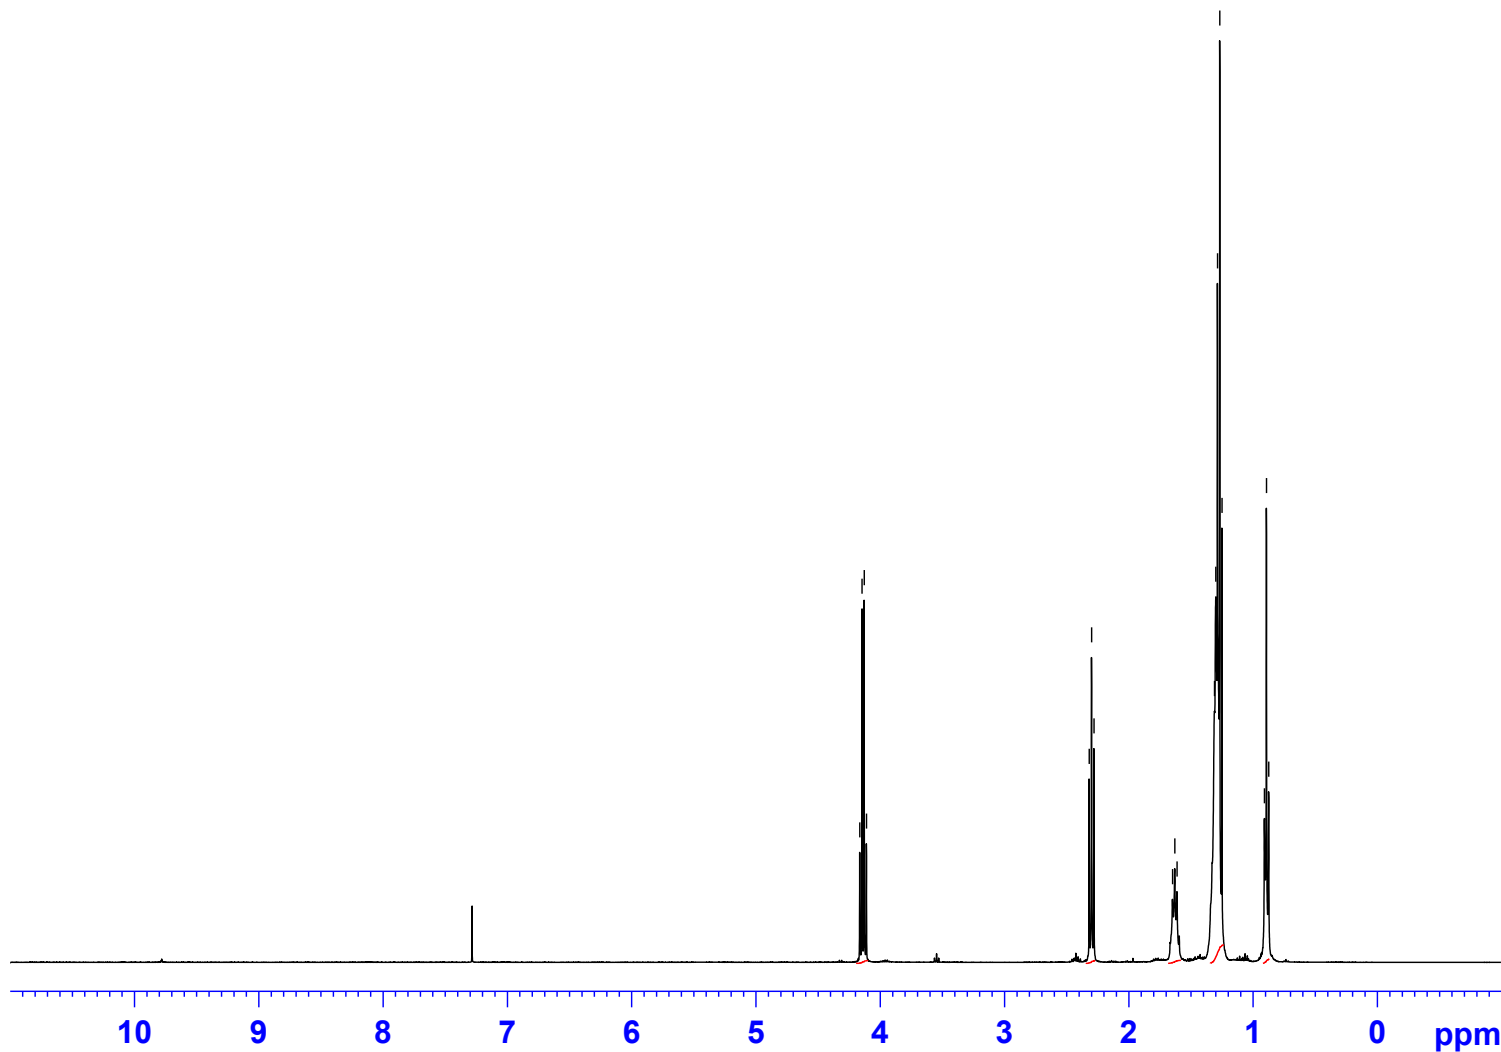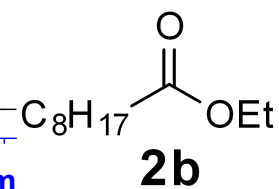



Current Data Parameters  
NAME TFish0454\_crude\_063009  
EXPNO 2  
PROCNO 1

F2 - Acquisition Parameters  
Date\_ 20090630  
Time\_ 10.27  
INSTRUM spect  
PROBHD 5 mm Multinucl  
PULPROG zgpg30  
TD 65536  
SOLVENT CDC13  
NS 194  
DS 4  
SWH 23980.814 Hz  
FIDRES 0.365918 Hz  
AQ 1.3664756 sec  
RG 5792.6  
DW 20.850 usec  
DE 6.50 usec  
TE 295.7 K  
D1 2.00000000 sec  
D11 0.03000000 sec  
TD0 1

==== CHANNEL f1 =====  
NUC1 13C  
P1 10.00 usec  
PL1 0.00 dB  
SFO1 100.6228298 MHz

==== CHANNEL f2 =====  
CPDPRG2 waltz16  
NUC2 1H  
PCPD2 80.00 usec  
PL2 -2.50 dB  
PL12 13.62 dB  
PL13 13.62 dB  
SFO2 400.1316005 MHz

F2 - Processing parameters  
SI 32768  
SF 100.6127690 MHz  
WDW EM  
SSB 0  
LB 1.00 Hz  
GB 0  
PC 1.40

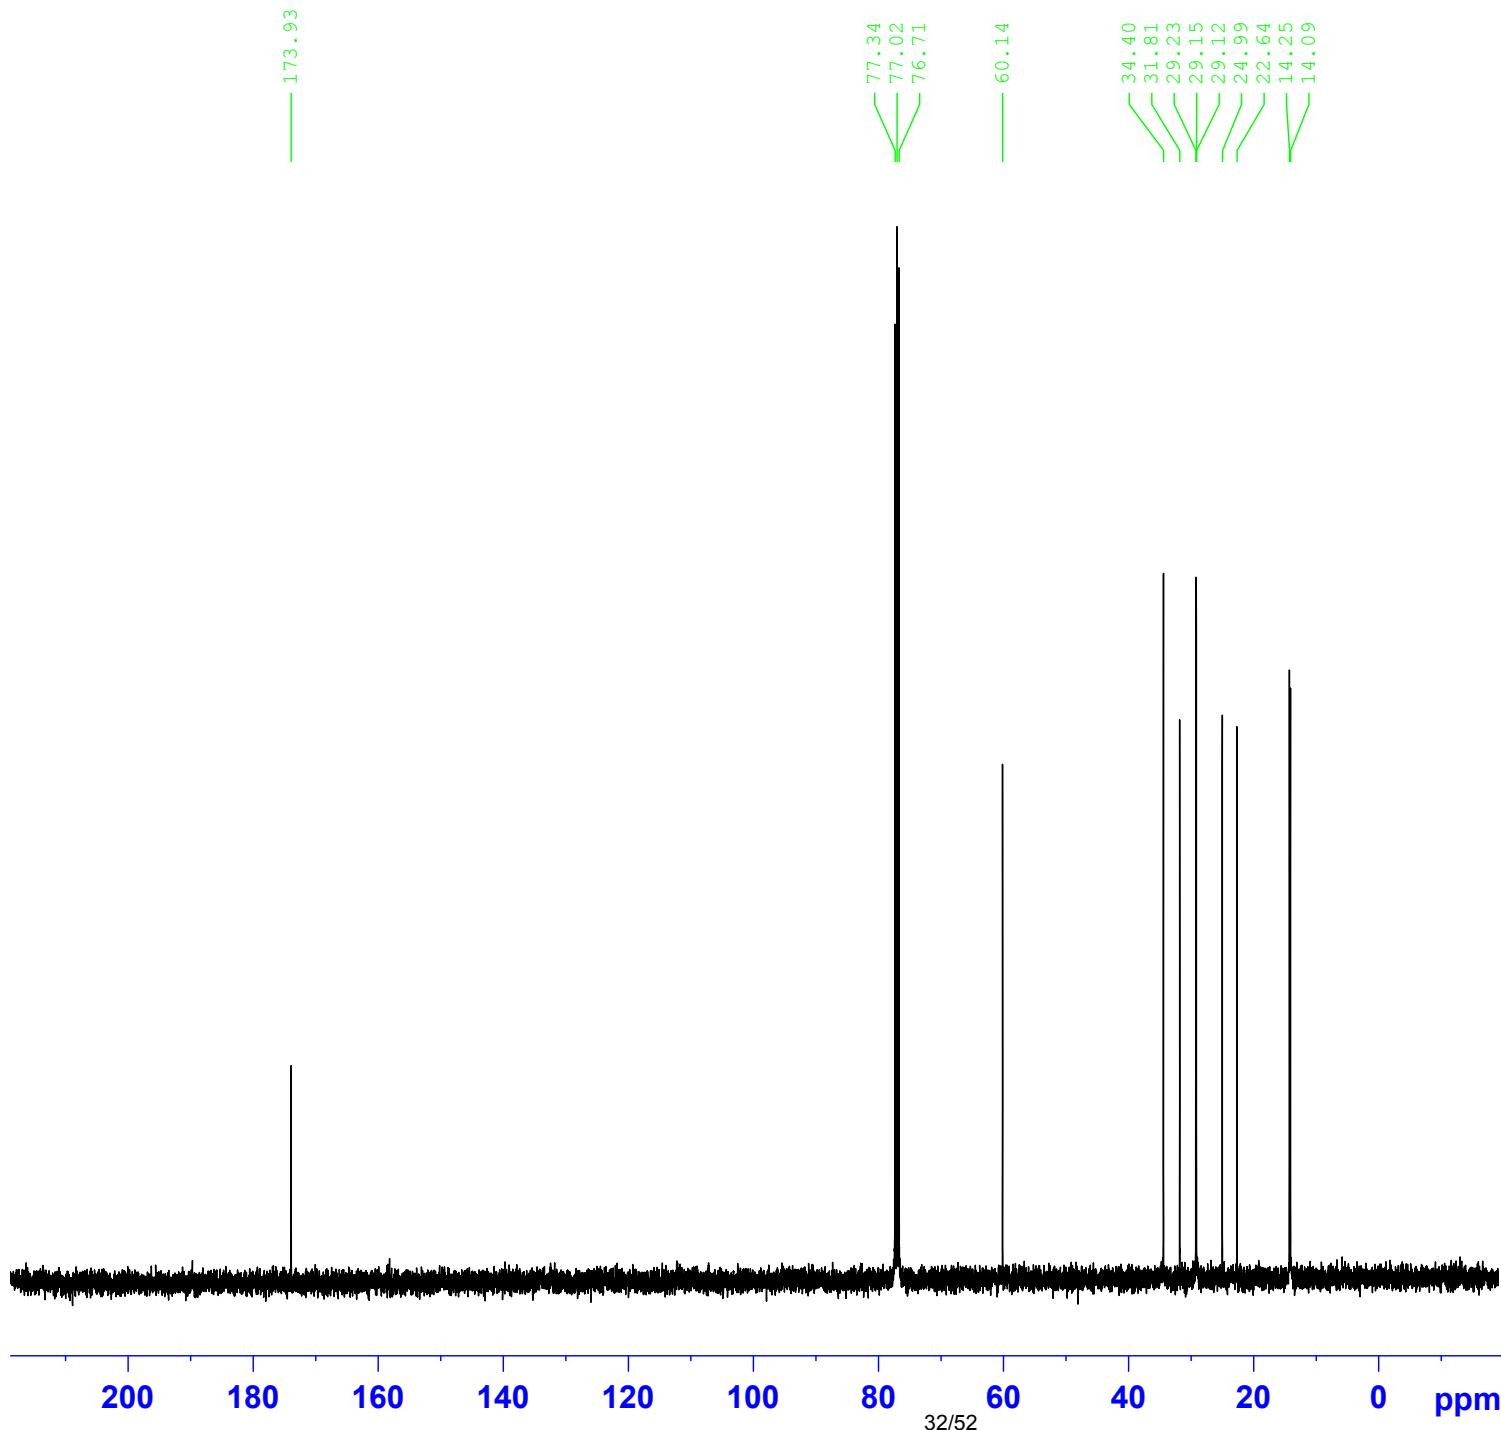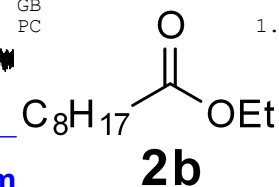





Current Data Parameters  
NAME TFish0455\_crude\_063009  
EXPNO 1  
PROCNO 1

F2 - Acquisition Parameters  
Date\_ 20090630  
Time\_ 18.57  
INSTRUM spect  
PROBHD 5 mm Multinucl  
PULPROG zg30  
TD 65536  
SOLVENT CDC13  
NS 16  
DS 2  
SWH 8278.146 Hz  
FIDRES 0.126314 Hz  
AQ 3.9584243 sec  
RG 57  
DW 60.400 usec  
DE 6.50 usec  
TE 295.2 K  
D1 1.00000000 sec  
TD0 1

===== CHANNEL f1 =====  
NUC1 1H  
P1 12.50 usec  
PL1 -2.50 dB  
SFO1 400.1324710 MHz

F2 - Processing parameters  
SI 32768  
SF 400.130000 MHz  
WDW EM  
SSB 0  
LB 0.30 Hz  
GB 0  
PC 1.00

5.065  
5.049  
5.033  
5.018  
5.002  
4.986  
4.971  
2.287  
2.268  
2.249  
1.638  
1.620  
1.602  
1.308  
1.298  
1.283  
1.248  
1.232  
0.908  
0.891  
0.874

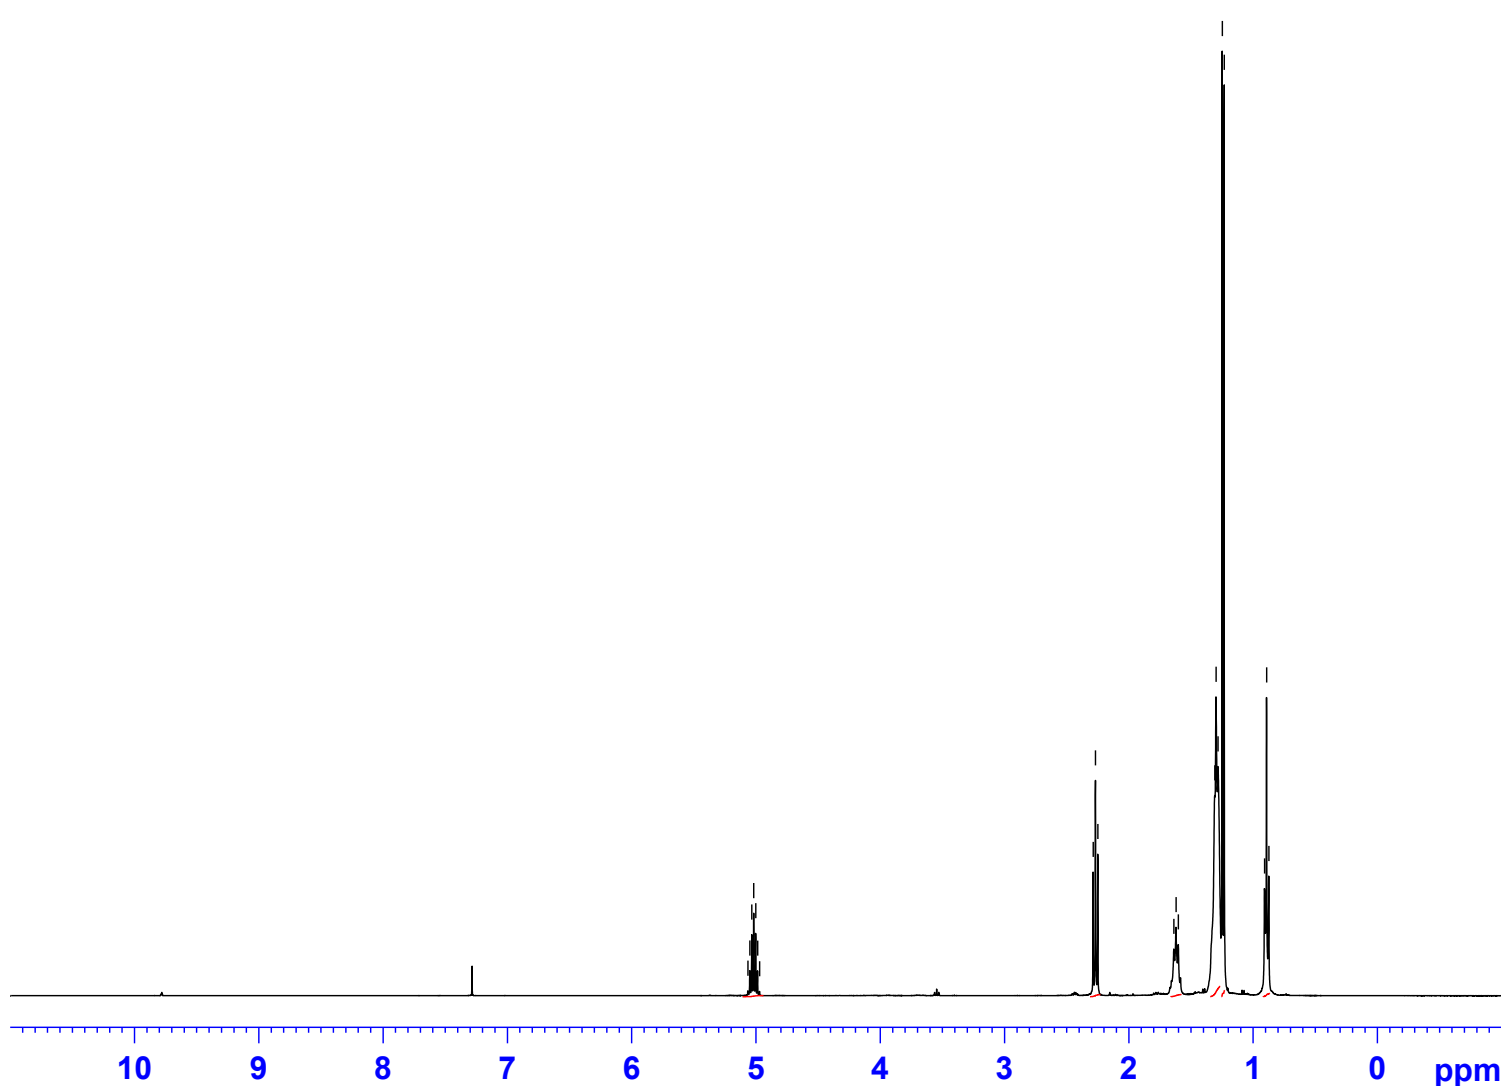

1.00  
2.07  
2.13  
10.24  
6.24  
3.19

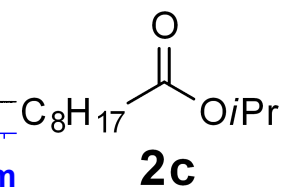



Current Data Parameters  
NAME TFish0455\_crude\_063009  
EXPNO 2  
PROCNO 1

F2 - Acquisition Parameters  
Date\_ 20090630  
Time\_ 19.02  
INSTRUM spect  
PROBHD 5 mm Multinucl  
PULPROG zgpg30  
TD 65536  
SOLVENT CDC13  
NS 222  
DS 4  
SWH 23980.814 Hz  
FIDRES 0.365918 Hz  
AQ 1.3664756 sec  
RG 5160.6  
DW 20.850 usec  
DE 6.50 usec  
TE 296.0 K  
D1 2.00000000 sec  
D11 0.03000000 sec  
TD0 1

==== CHANNEL f1 =====  
NUC1 13C  
P1 10.00 usec  
PL1 0.00 dB  
SFO1 100.6228298 MHz

==== CHANNEL f2 =====  
CPDPRG2 waltz16  
NUC2 1H  
PCPD2 80.00 usec  
PL2 -2.50 dB  
PL12 13.62 dB  
PL13 13.62 dB  
SFO2 400.1316005 MHz

F2 - Processing parameters  
SI 32768  
SF 100.6127690 MHz  
WDW EM  
SSB 0  
LB 1.00 Hz  
GB 0  
PC 1.40

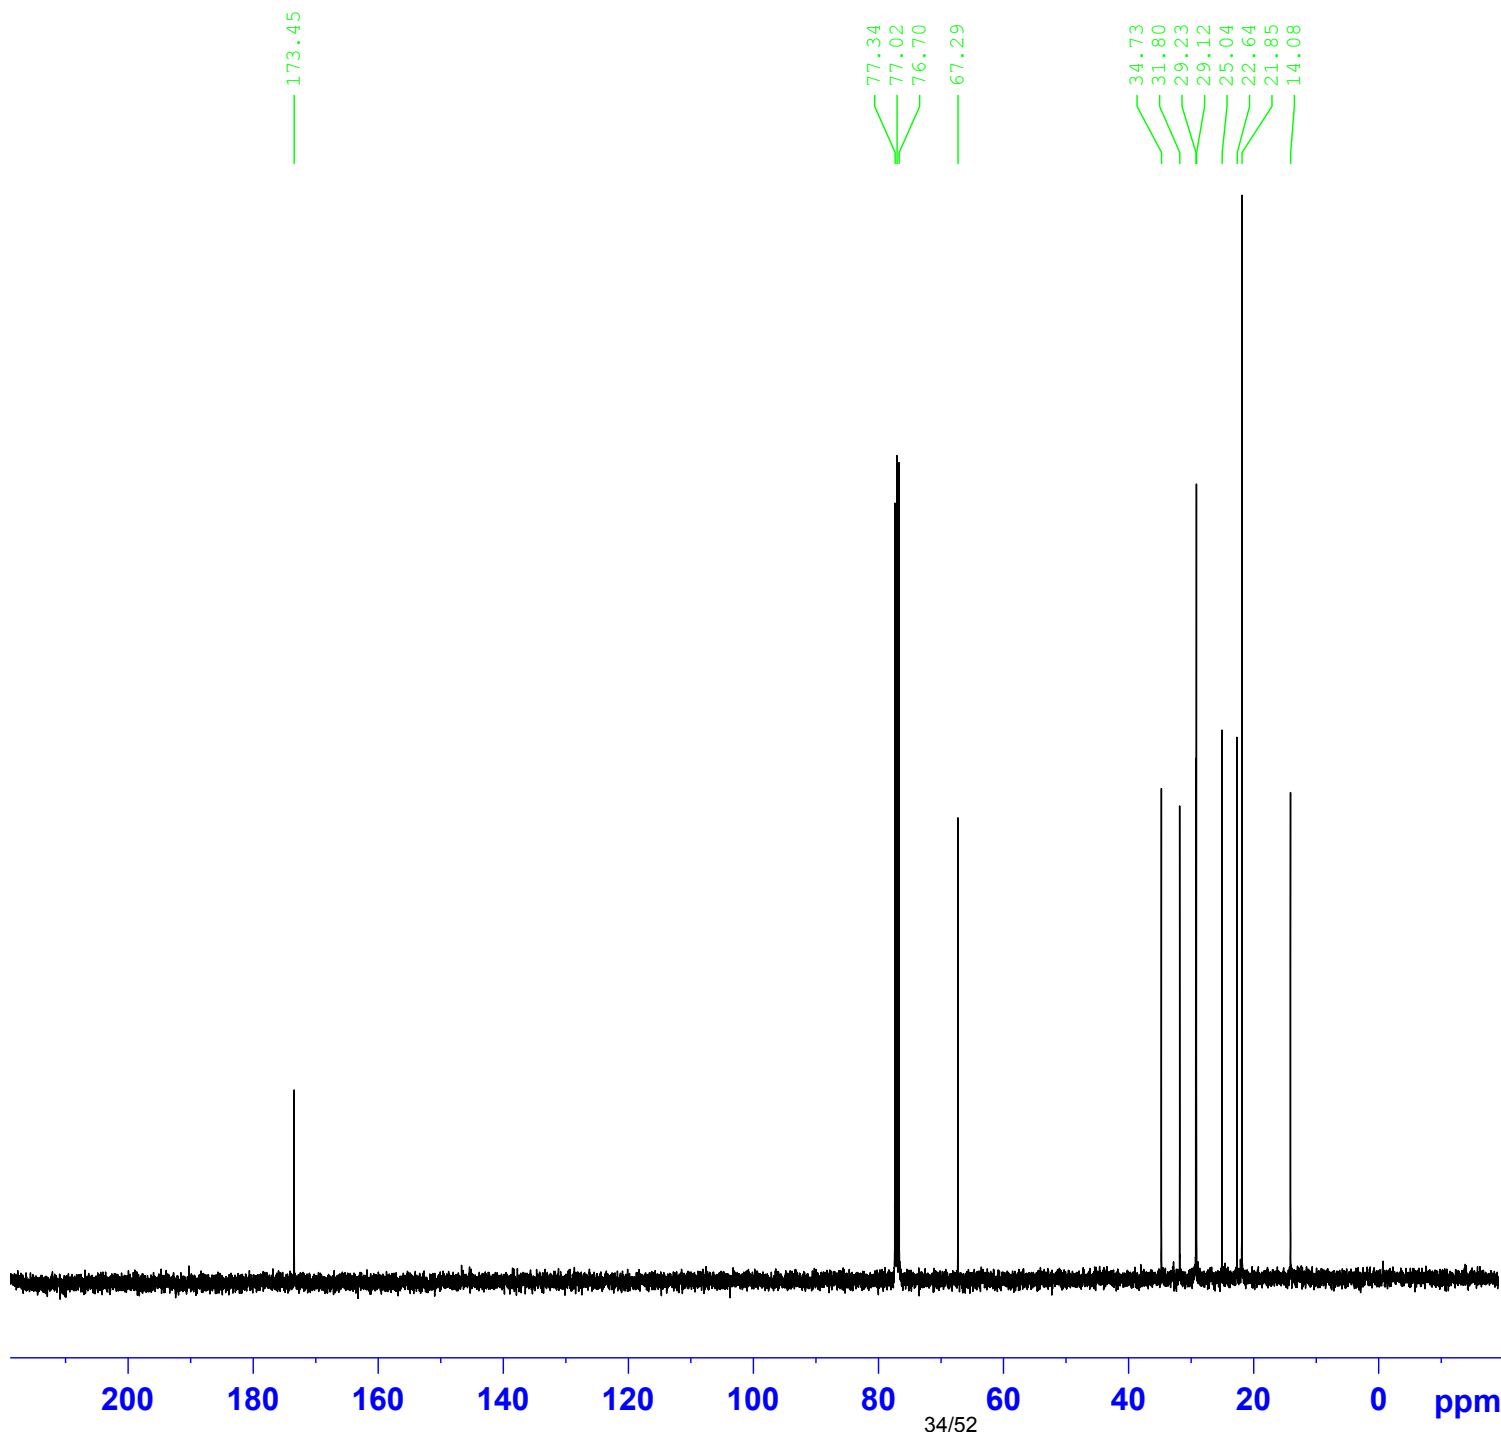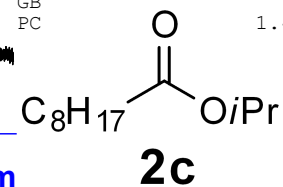



Current Data Parameters  
NAME TFish0456\_crude\_063009  
EXPNO 1  
PROCNO 1

F2 - Acquisition Parameters  
Date\_ 20090630  
Time\_ 19.15  
INSTRUM spect  
PROBHD 5 mm Multinucl  
PULPROG zg30  
TD 65536  
SOLVENT CDC13  
NS 16  
DS 2  
SWH 8278.146 Hz  
FIDRES 0.126314 Hz  
AQ 3.9584243 sec  
RG 71.8  
DW 60.400 usec  
DE 6.50 usec  
TE 295.4 K  
D1 1.00000000 sec  
TD0 1

===== CHANNEL f1 =====  
NUC1 1H  
P1 12.50 usec  
PL1 -2.50 dB  
SFO1 400.1324710 MHz

F2 - Processing parameters  
SI 32768  
SF 400.130000 MHz  
WDW EM  
SSB 0  
LB 0.30 Hz  
GB 0  
PC 1.00

4.237  
4.229  
4.225  
4.221  
4.213  
3.852  
3.845  
3.840  
3.836  
3.829  
2.381  
2.362  
2.343  
2.123  
1.664  
1.646  
1.628  
1.281  
0.907  
0.890  
0.873

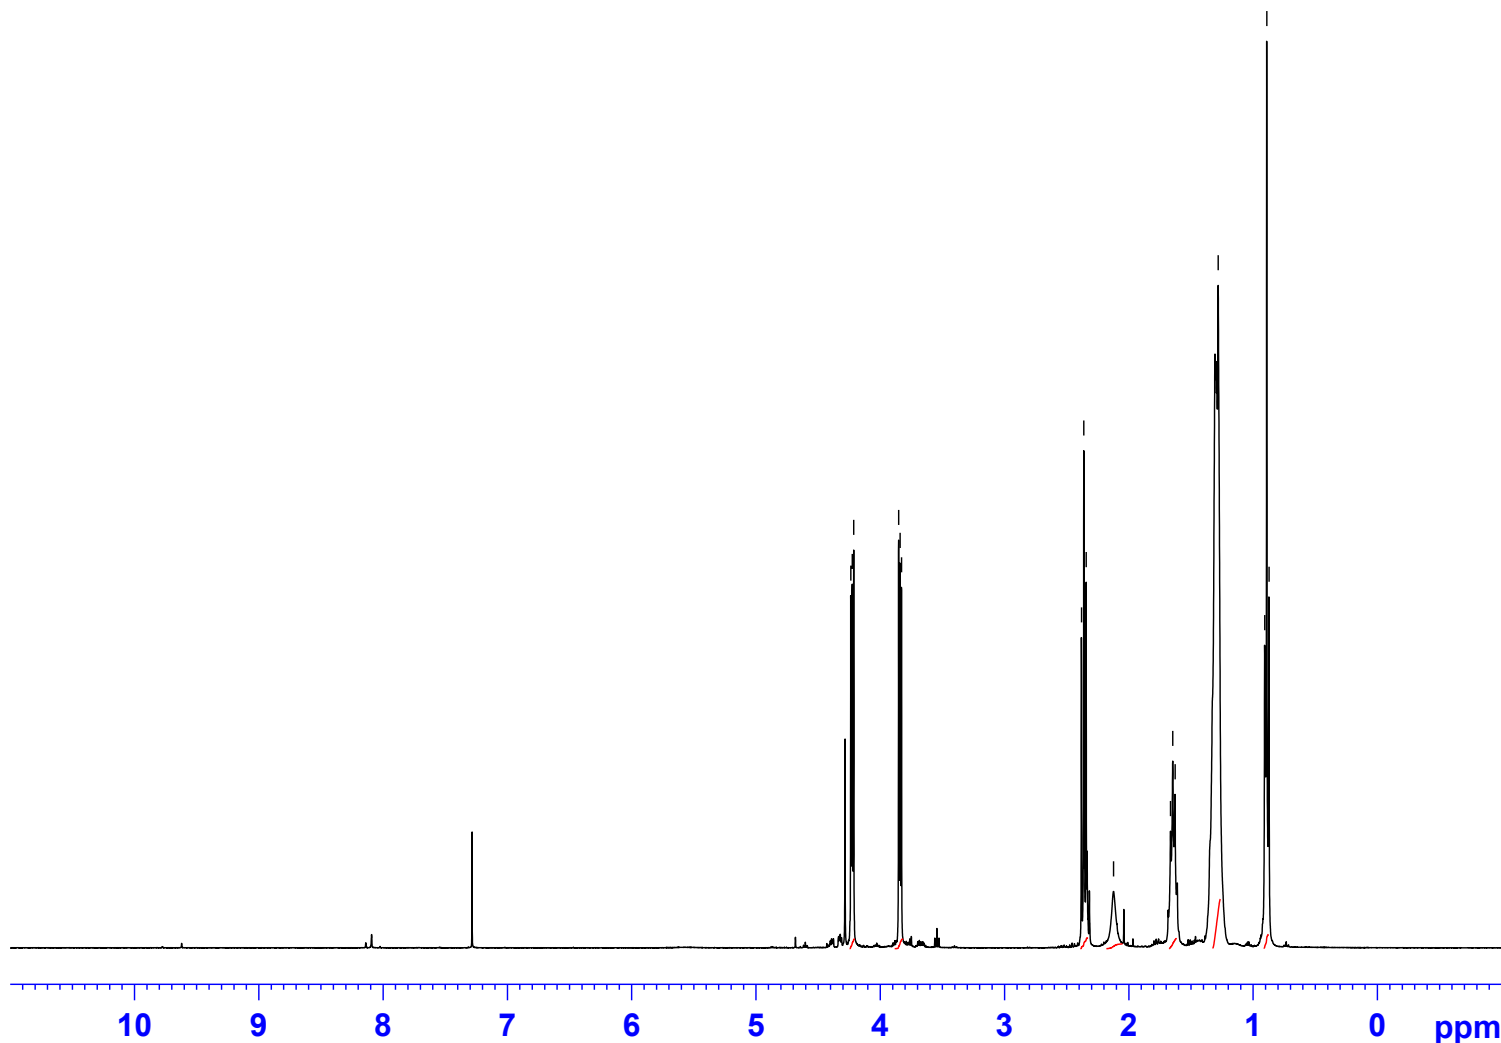

2.03  
2.00  
2.31  
1.01  
2.19  
10.47  
3.09

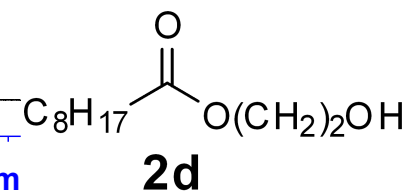



Current Data Parameters  
NAME TFish0456\_crude\_063009  
EXPNO 2  
PROCNO 1

F2 - Acquisition Parameters  
Date\_ 20090630  
Time\_ 19.24  
INSTRUM spect  
PROBHD 5 mm Multinucl  
PULPROG zgpg30  
TD 65536  
SOLVENT CDC13  
NS 132  
DS 4  
SWH 23980.814 Hz  
FIDRES 0.365918 Hz  
AQ 1.3664756 sec  
RG 5160.6  
DW 20.850 usec  
DE 6.50 usec  
TE 296.0 K  
D1 2.00000000 sec  
D11 0.03000000 sec  
TD0 1

==== CHANNEL f1 =====  
NUC1 13C  
P1 10.00 usec  
PL1 0.00 dB  
SFO1 100.6228298 MHz

==== CHANNEL f2 =====  
CPDPRG2 waltz16  
NUC2 1H  
PCPD2 80.00 usec  
PL2 -2.50 dB  
PL12 13.62 dB  
PL13 13.62 dB  
SFO2 400.1316005 MHz

F2 - Processing parameters  
SI 32768  
SF 100.6127690 MHz  
WDW EM  
SSB 0  
LB 1.00 Hz  
GB 0  
PC 1.40

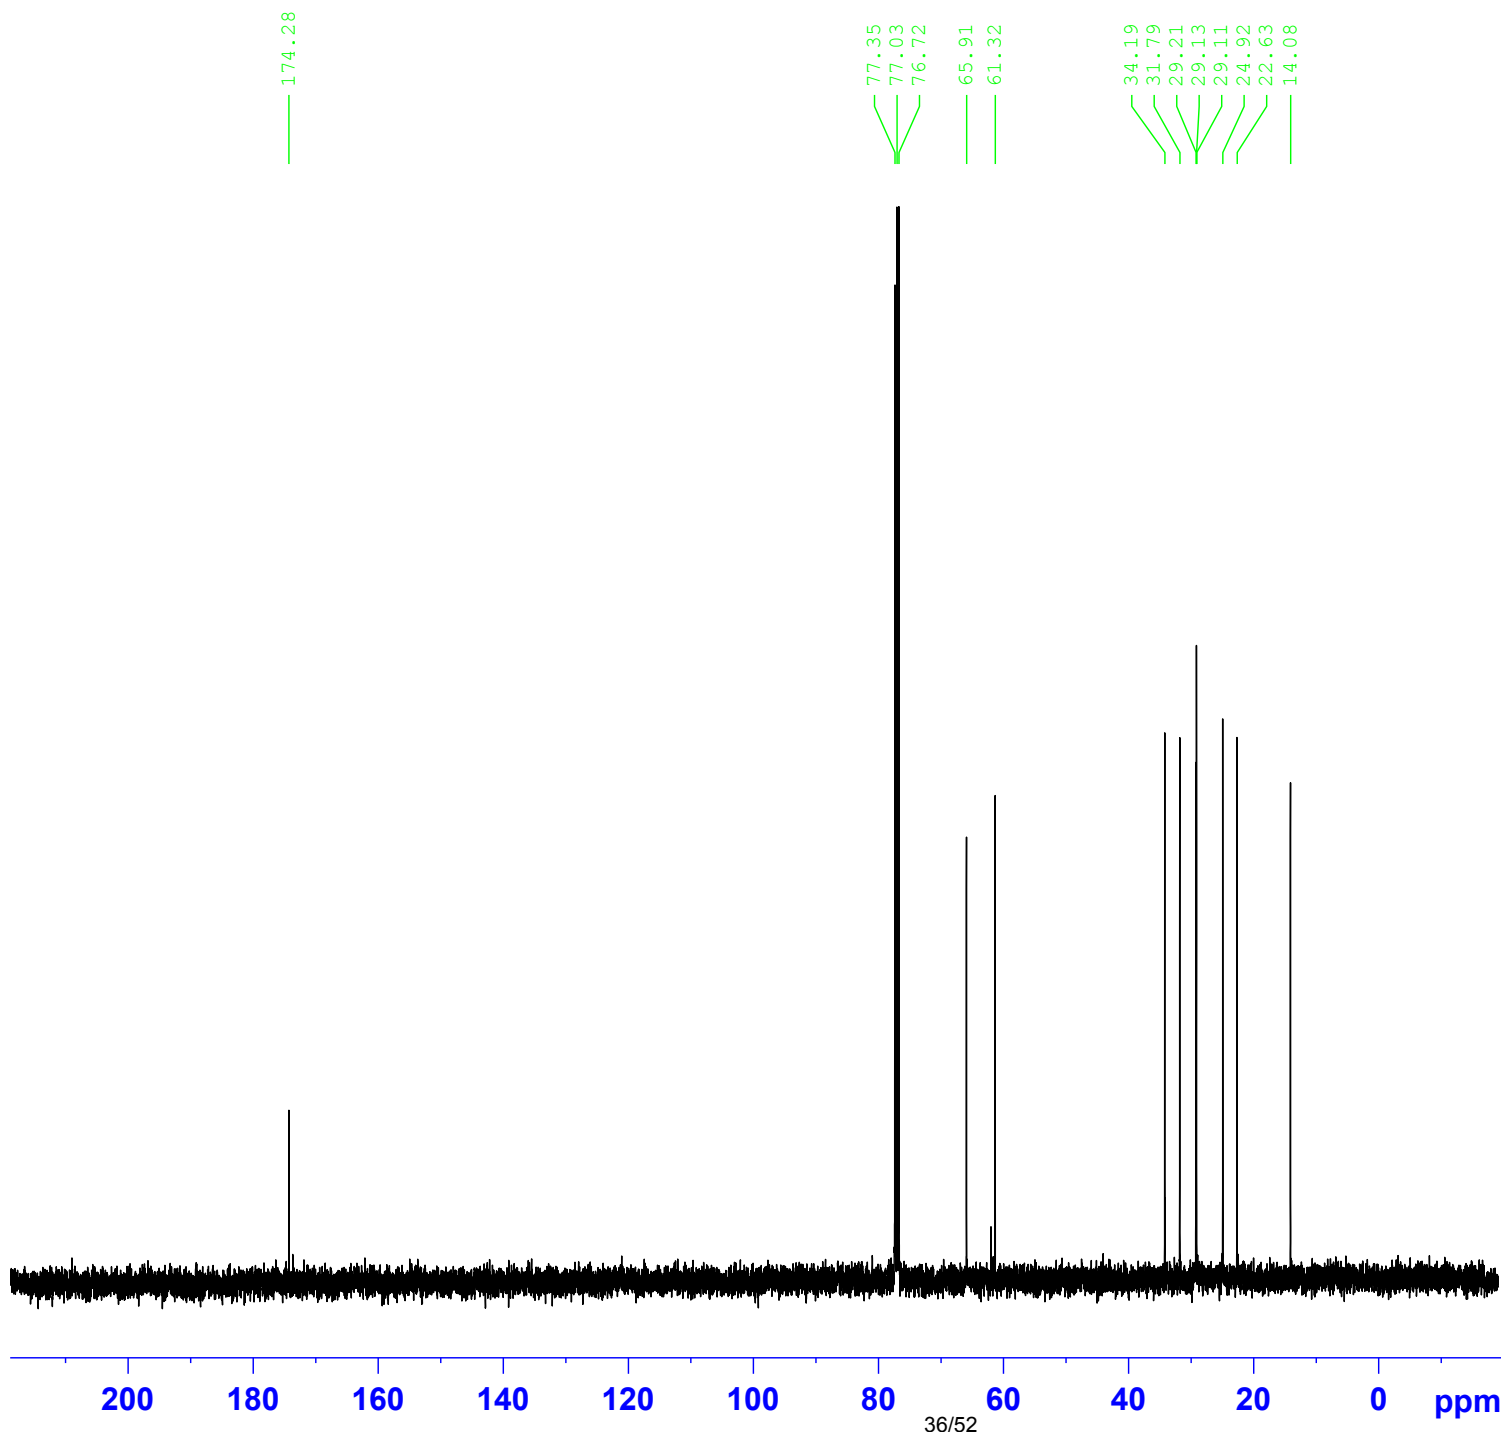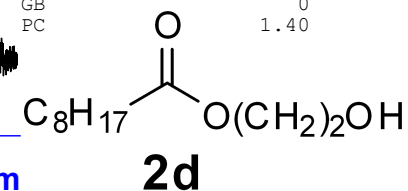



Current Data Parameters  
NAME TFish0445\_crude\_062409  
EXPNO 1  
PROCNO 1

F2 - Acquisition Parameters  
Date\_ 20090624  
Time\_ 17.19  
INSTRUM spect  
PROBHD 5 mm Multinucl  
PULPROG zg30  
TD 65536  
SOLVENT CDC13  
NS 16  
DS 2  
SWH 8278.146 Hz  
FIDRES 0.126314 Hz  
AQ 3.9584243 sec  
RG 90.5  
DW 60.400 usec  
DE 6.50 usec  
TE 296.1 K  
D1 1.00000000 sec  
TD0 1

==== CHANNEL f1 =====  
NUC1 1H  
P1 12.50 usec  
PL1 -2.50 dB  
SFO1 400.1324710 MHz

F2 - Processing parameters  
SI 32768  
SF 400.130000 MHz  
WDW EM  
SSB 0  
LB 0.30 Hz  
GB 0  
PC 1.00

4.077  
4.061  
4.044  
3.681  
2.336  
2.318  
2.299  
2.060  
1.659  
1.644  
1.627  
1.613  
1.326

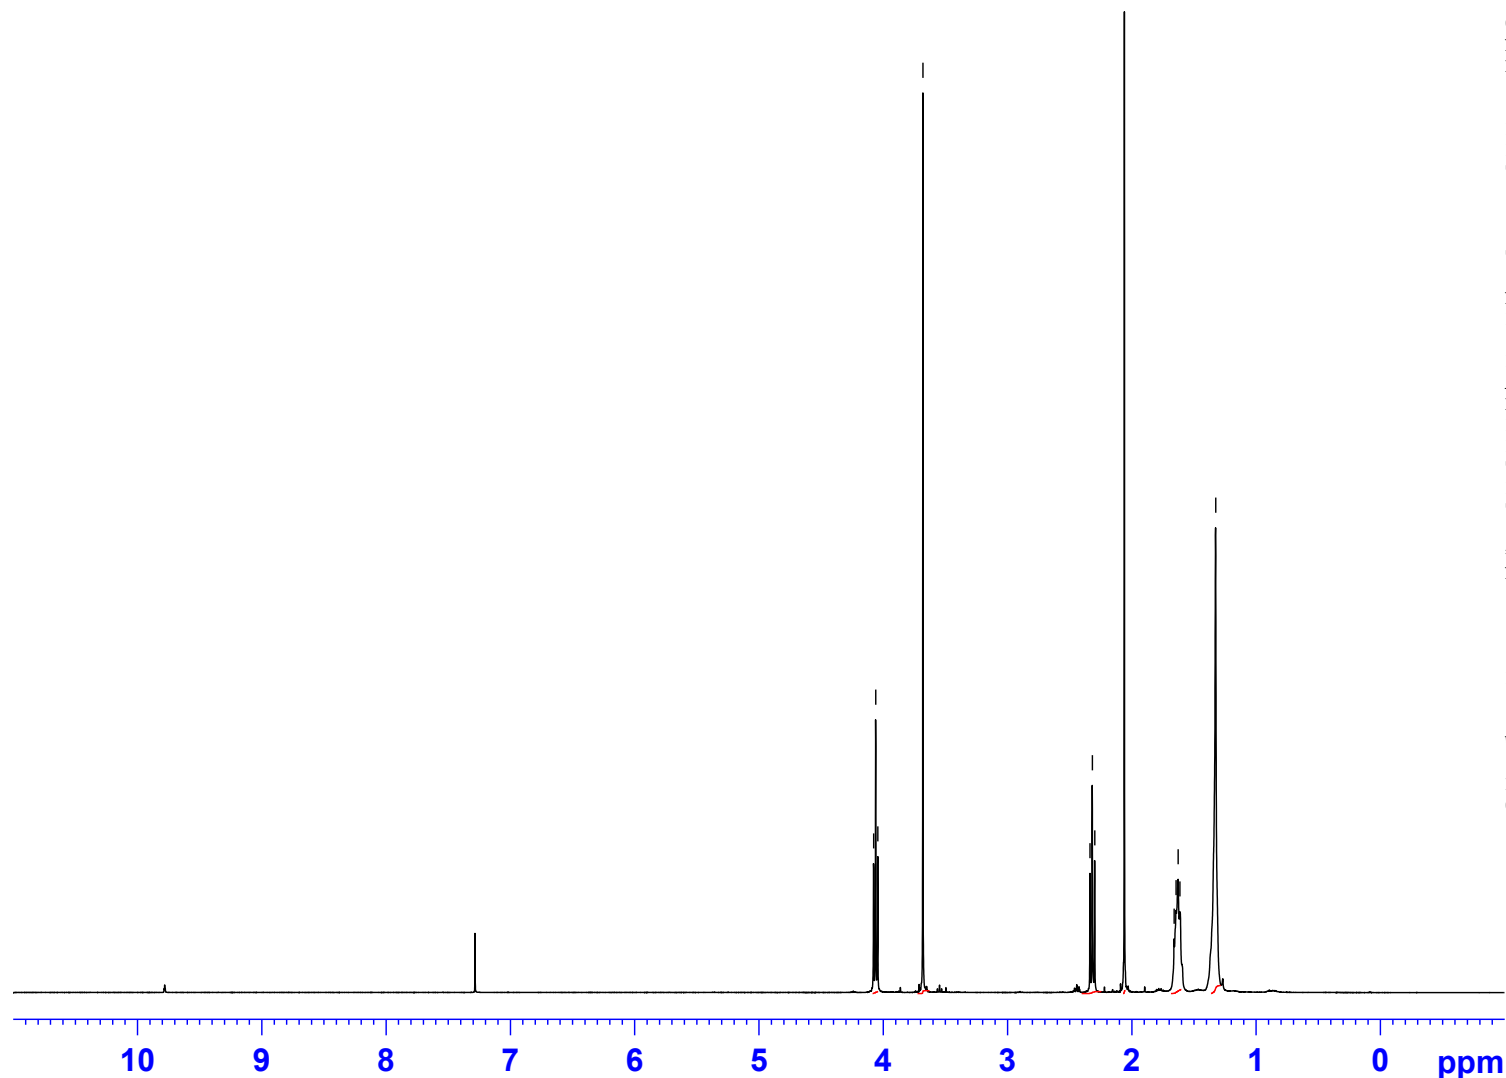

2.09  
2.93  
2.00  
3.04  
4.10  
8.11

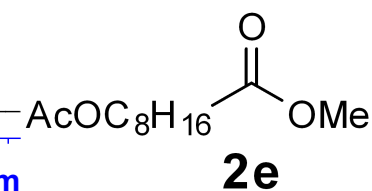



Current Data Parameters  
NAME TFish0445\_crude\_062409  
EXPNO 2  
PROCNO 1

F2 - Acquisition Parameters  
Date\_ 20090626  
Time\_ 15.44  
INSTRUM spect  
PROBHD 5 mm Multinucl  
PULPROG zgpg30  
TD 65536  
SOLVENT CDC13  
NS 205  
DS 4  
SWH 23980.814 Hz  
FIDRES 0.365918 Hz  
AQ 1.3664756 sec  
RG 5160.6  
DW 20.850 usec  
DE 6.50 usec  
TE 296.3 K  
D1 2.00000000 sec  
D11 0.03000000 sec  
TD0 1

==== CHANNEL f1 =====  
NUC1 13C  
P1 10.00 usec  
PL1 0.00 dB  
SFO1 100.6228298 MHz

==== CHANNEL f2 =====  
CPDPRG2 waltz16  
NUC2 1H  
PCPD2 80.00 usec  
PL2 -2.50 dB  
PL12 13.62 dB  
PL13 13.62 dB  
SFO2 400.1316005 MHz

F2 - Processing parameters  
SI 32768  
SF 100.6127690 MHz  
WDW EM  
SSB 0  
LB 1.00 Hz  
GB 0  
PC 1.40

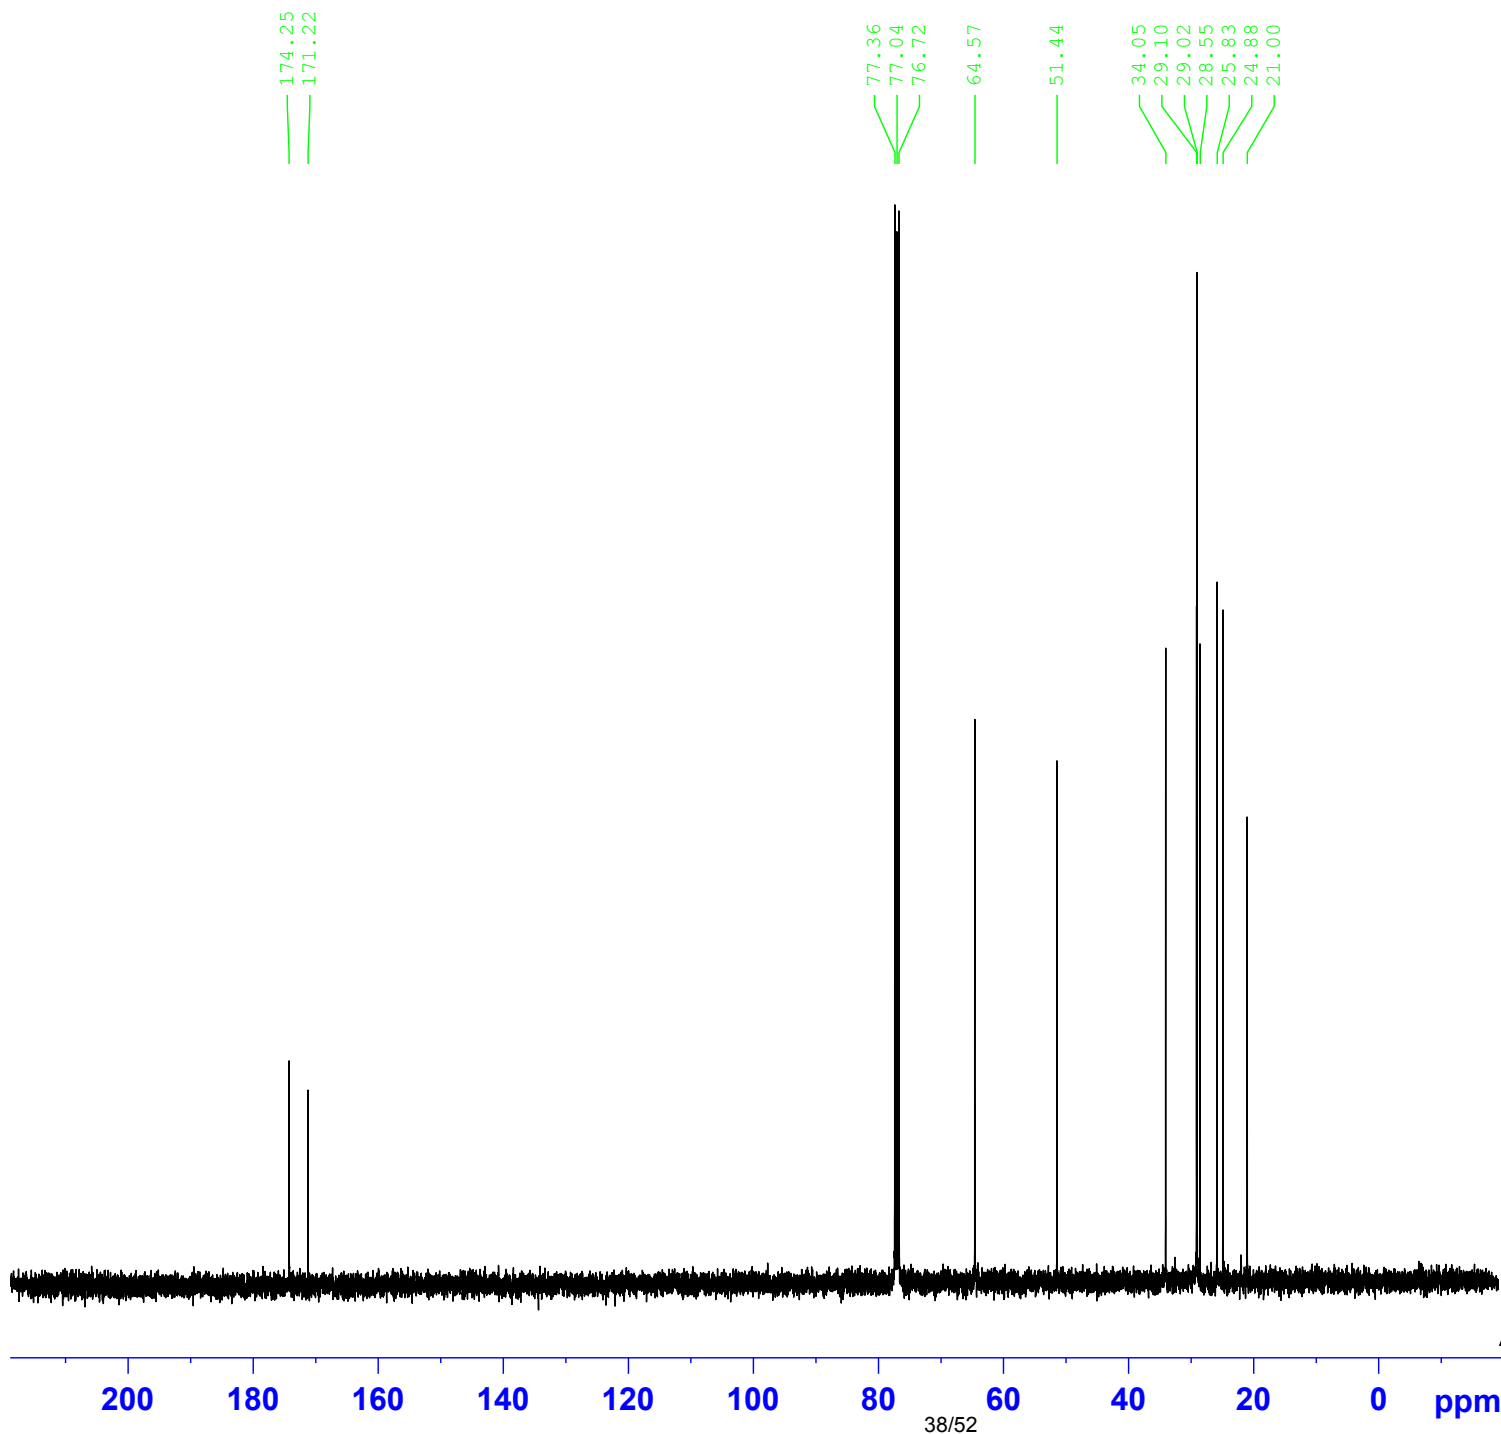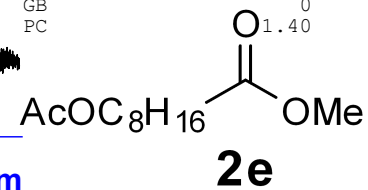



Current Data Parameters  
NAME TFish0457\_crude\_063009  
EXPNO 1  
PROCNO 1

F2 - Acquisition Parameters  
Date\_ 20090630  
Time\_ 19.31  
INSTRUM spect  
PROBHD 5 mm Multinucl  
PULPROG zg30  
TD 65536  
SOLVENT CDC13  
NS 16  
DS 2  
SWH 8278.146 Hz  
FIDRES 0.126314 Hz  
AQ 3.9584243 sec  
RG 71.8  
DW 60.400 usec  
DE 6.50 usec  
TE 295.4 K  
D1 1.00000000 sec  
TD0 1

===== CHANNEL f1 =====  
NUC1 1H  
P1 12.50 usec  
PL1 -2.50 dB  
SFO1 400.1324710 MHz

F2 - Processing parameters  
SI 32768  
SF 400.130000 MHz  
WDW EM  
SSB 0  
LB 0.30 Hz  
GB 0  
PC 1.00

4.520  
3.678  
3.550  
3.534  
3.519  
2.485  
2.466  
2.448  
2.003  
1.988  
1.985  
1.976  
1.970  
1.954  
1.951  
1.936

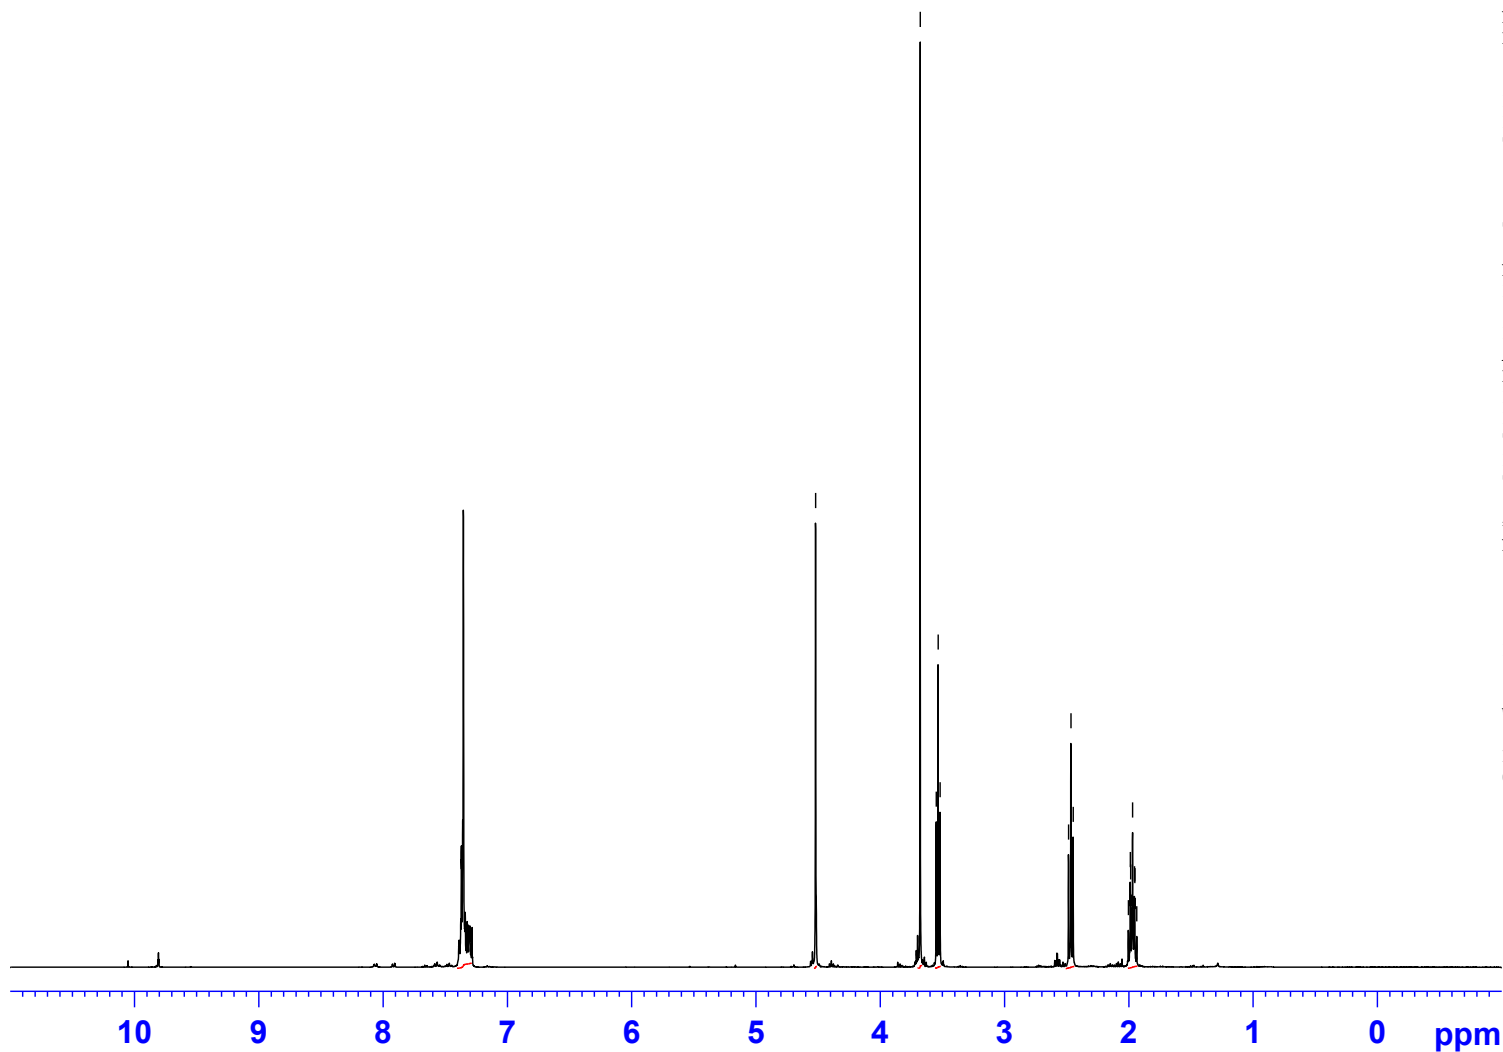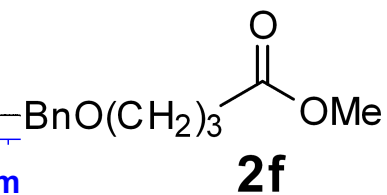



Current Data Parameters  
NAME TFish0457\_crude\_063009  
EXPNO 2  
PROCNO 1

F2 - Acquisition Parameters  
Date\_ 20090630  
Time\_ 19.35  
INSTRUM spect  
PROBHD 5 mm Multinucl  
PULPROG zgpg30  
TD 65536  
SOLVENT CDC13  
NS 157  
DS 4  
SWH 23980.814 Hz  
FIDRES 0.365918 Hz  
AQ 1.3664756 sec  
RG 4597.6  
DW 20.850 usec  
DE 6.50 usec  
TE 296.0 K  
D1 2.00000000 sec  
D11 0.03000000 sec  
TD0 1

==== CHANNEL f1 =====  
NUC1 13C  
P1 10.00 usec  
PL1 0.00 dB  
SFO1 100.6228298 MHz

==== CHANNEL f2 =====  
CPDPRG2 waltz16  
NUC2 1H  
PCPD2 80.00 usec  
PL2 -2.50 dB  
PL12 13.62 dB  
PL13 13.62 dB  
SFO2 400.1316005 MHz

F2 - Processing parameters  
SI 32768  
SF 100.6127690 MHz  
WDW EM  
SSB 0  
LB 1.00 Hz  
GB 0  
PC 1.40

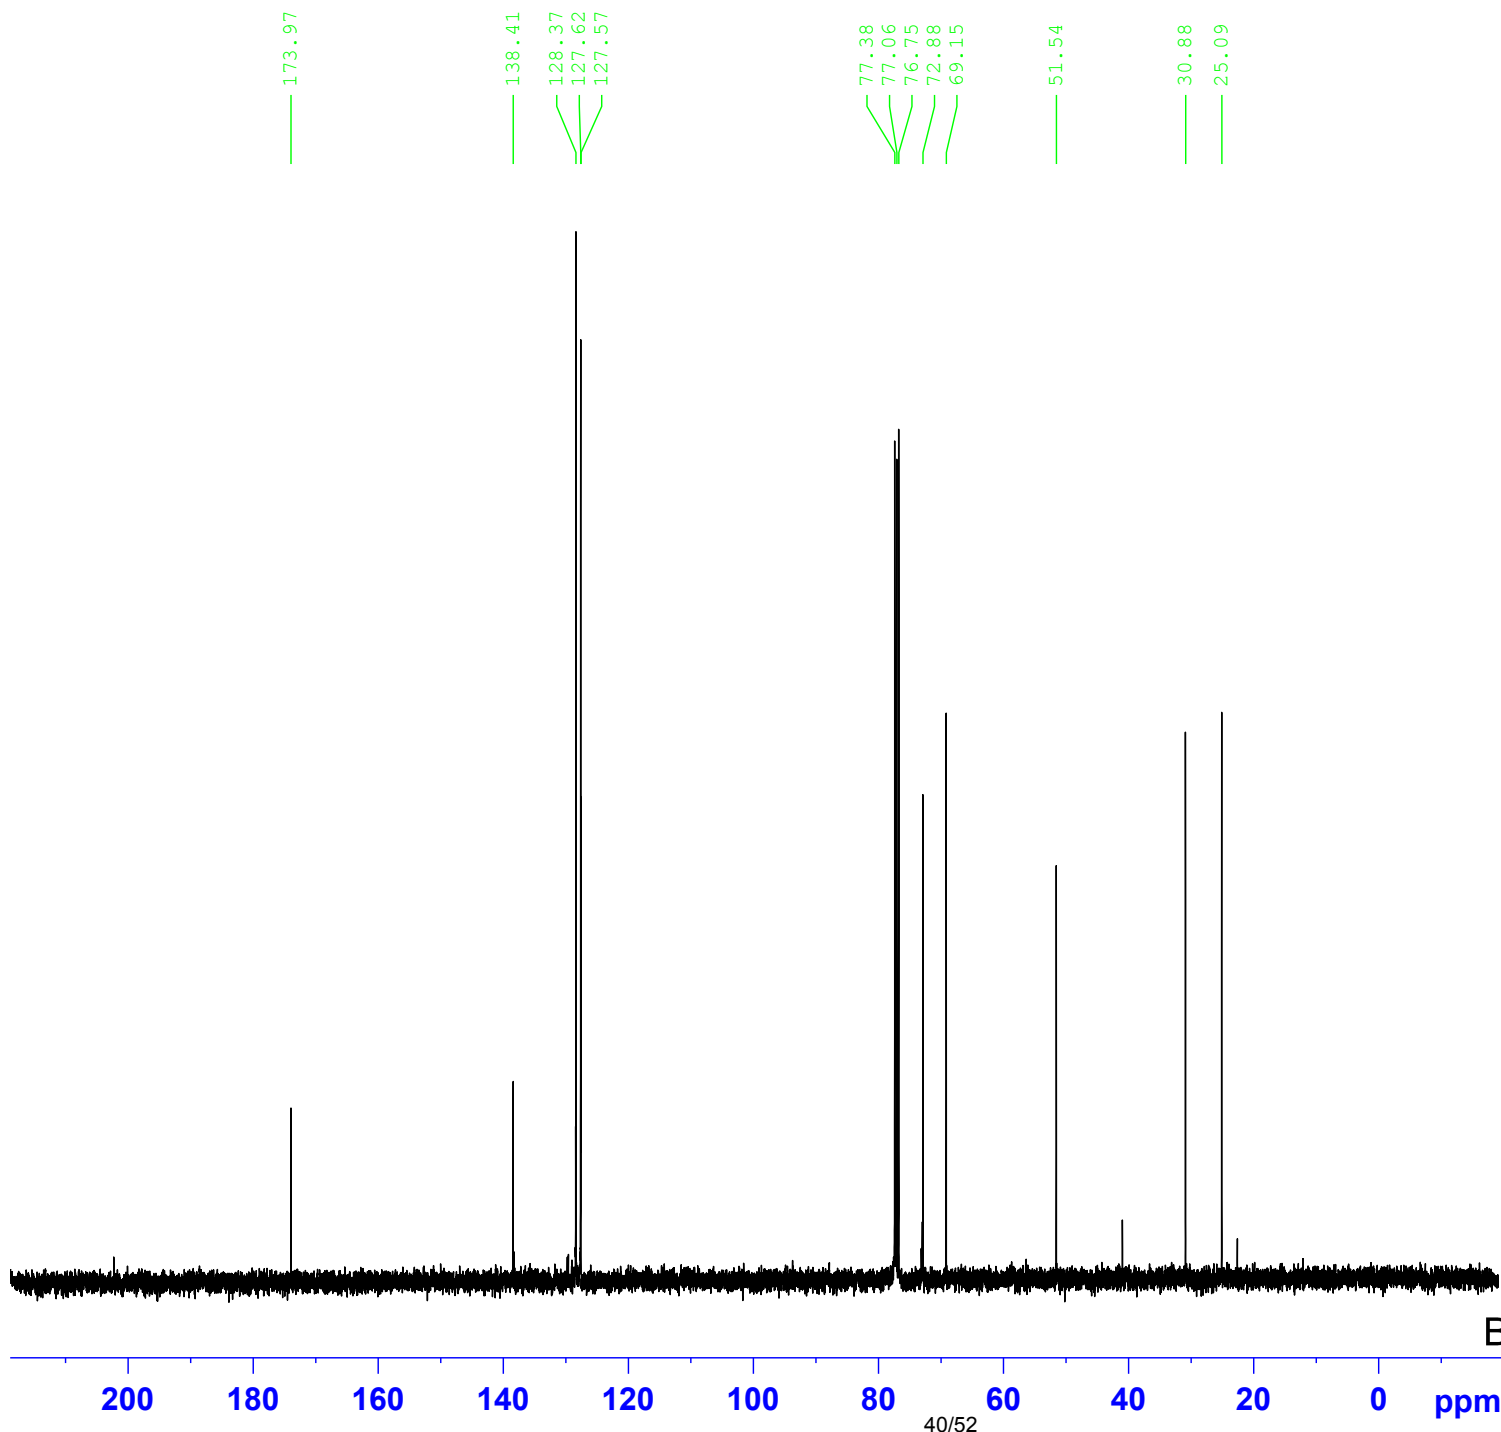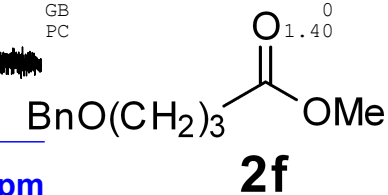





Current Data Parameters  
NAME TFish0458\_crude\_063009  
EXPNO 1  
PROCNO 1

F2 - Acquisition Parameters  
Date\_ 20090630  
Time\_ 19.46  
INSTRUM spect  
PROBHD 5 mm Multinucl  
PULPROG zg30  
TD 65536  
SOLVENT CDC13  
NS 16  
DS 2  
SWH 8278.146 Hz  
FIDRES 0.126314 Hz  
AQ 3.9584243 sec  
RG 71.8  
DW 60.400 usec  
DE 6.50 usec  
TE 295.4 K  
D1 1.00000000 sec  
TD0 1

===== CHANNEL f1 =====  
NUC1 1H  
P1 12.50 usec  
PL1 -2.50 dB  
SFO1 400.1324710 MHz

F2 - Processing parameters  
SI 32768  
SF 400.130000 MHz  
WDW EM  
SSB 0  
LB 0.30 Hz  
GB 0  
PC 1.00

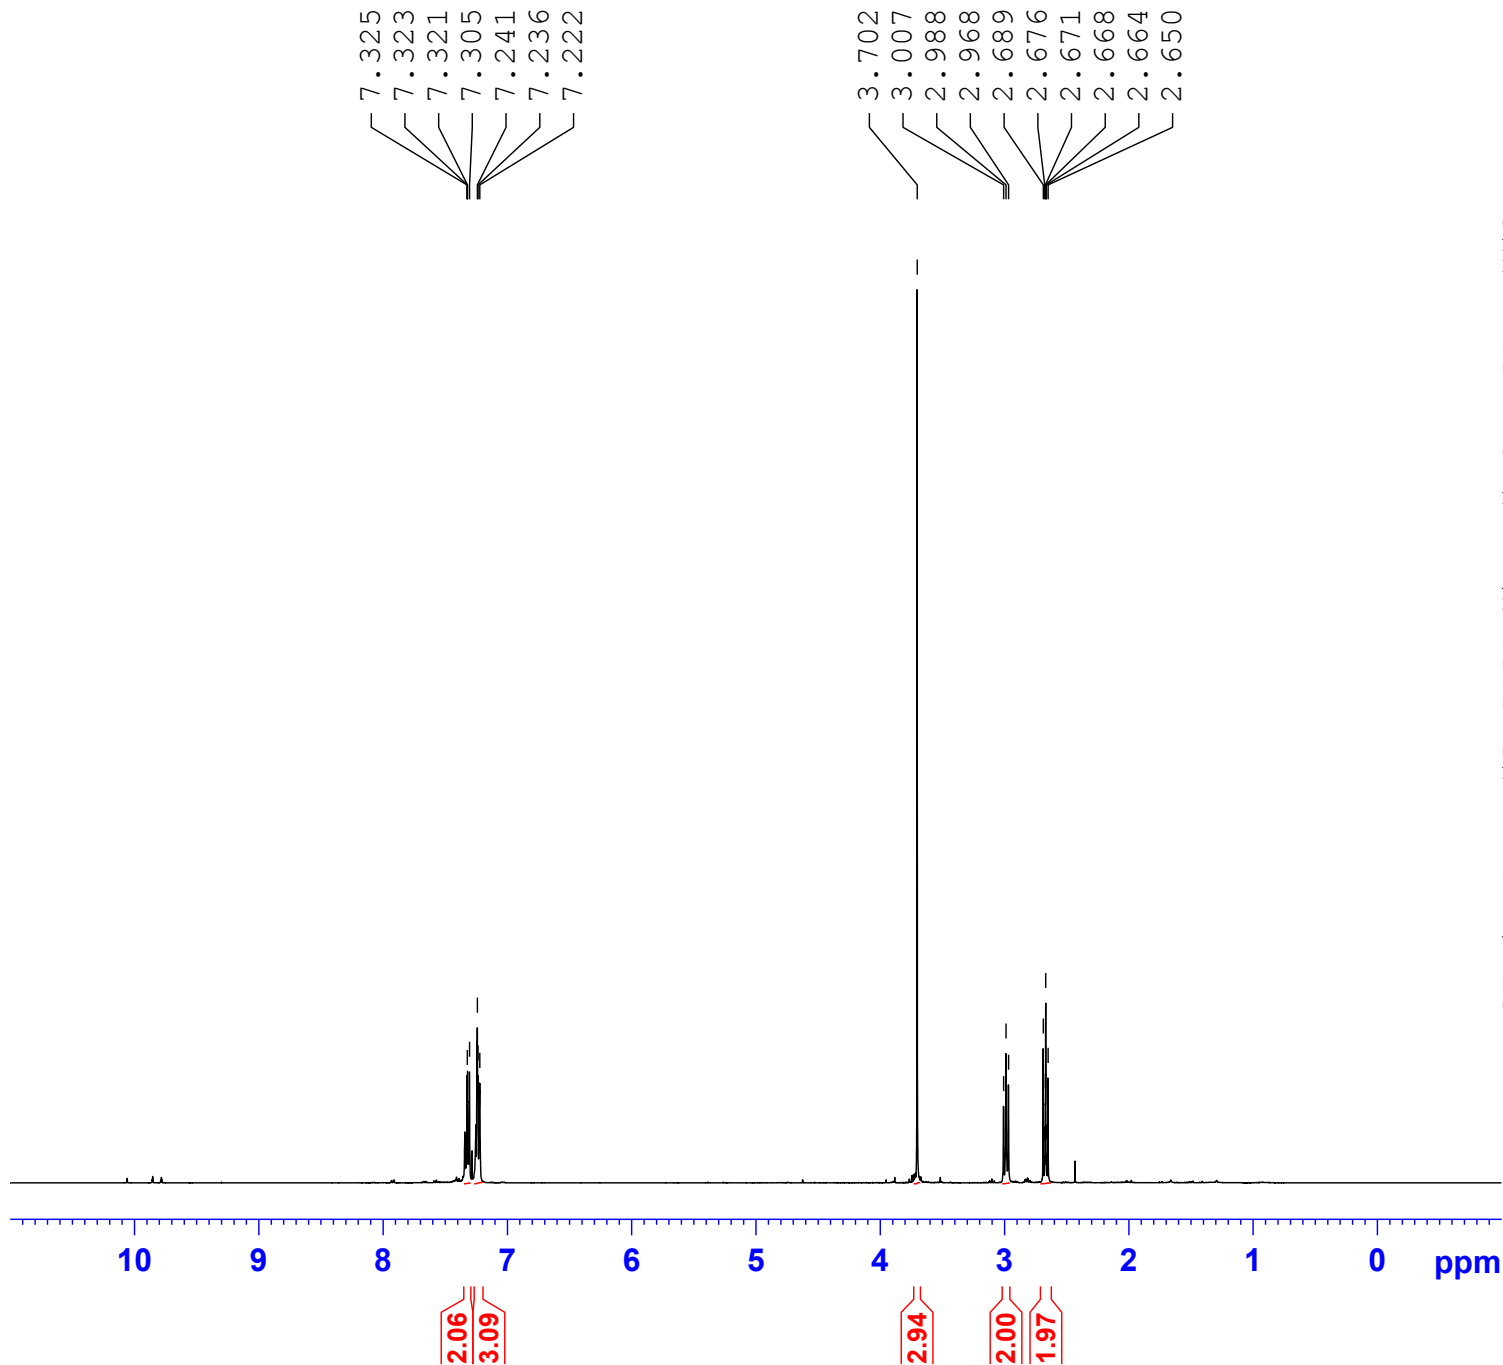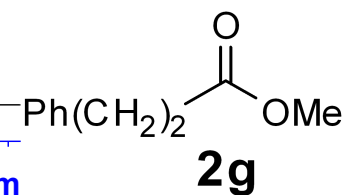



Current Data Parameters  
NAME TFish0458\_crude\_063009  
EXPNO 2  
PROCNO 1

F2 - Acquisition Parameters  
Date\_ 20090630  
Time\_ 19.49  
INSTRUM spect  
PROBHD 5 mm Multinucl  
PULPROG zgpg30  
TD 65536  
SOLVENT CDC13  
NS 123  
DS 4  
SWH 23980.814 Hz  
FIDRES 0.365918 Hz  
AQ 1.3664756 sec  
RG 4597.6  
DW 20.850 usec  
DE 6.50 usec  
TE 295.7 K  
D1 2.00000000 sec  
D11 0.03000000 sec  
TD0 1

==== CHANNEL f1 =====  
NUC1 13C  
P1 10.00 usec  
PL1 0.00 dB  
SFO1 100.6228298 MHz

==== CHANNEL f2 =====  
CPDPRG2 waltz16  
NUC2 1H  
PCPD2 80.00 usec  
PL2 -2.50 dB  
PL12 13.62 dB  
PL13 13.62 dB  
SFO2 400.1316005 MHz

F2 - Processing parameters  
SI 32768  
SF 100.6127690 MHz  
WDW EM  
SSB 0  
LB 1.00 Hz  
GB 0  
PC 1.40

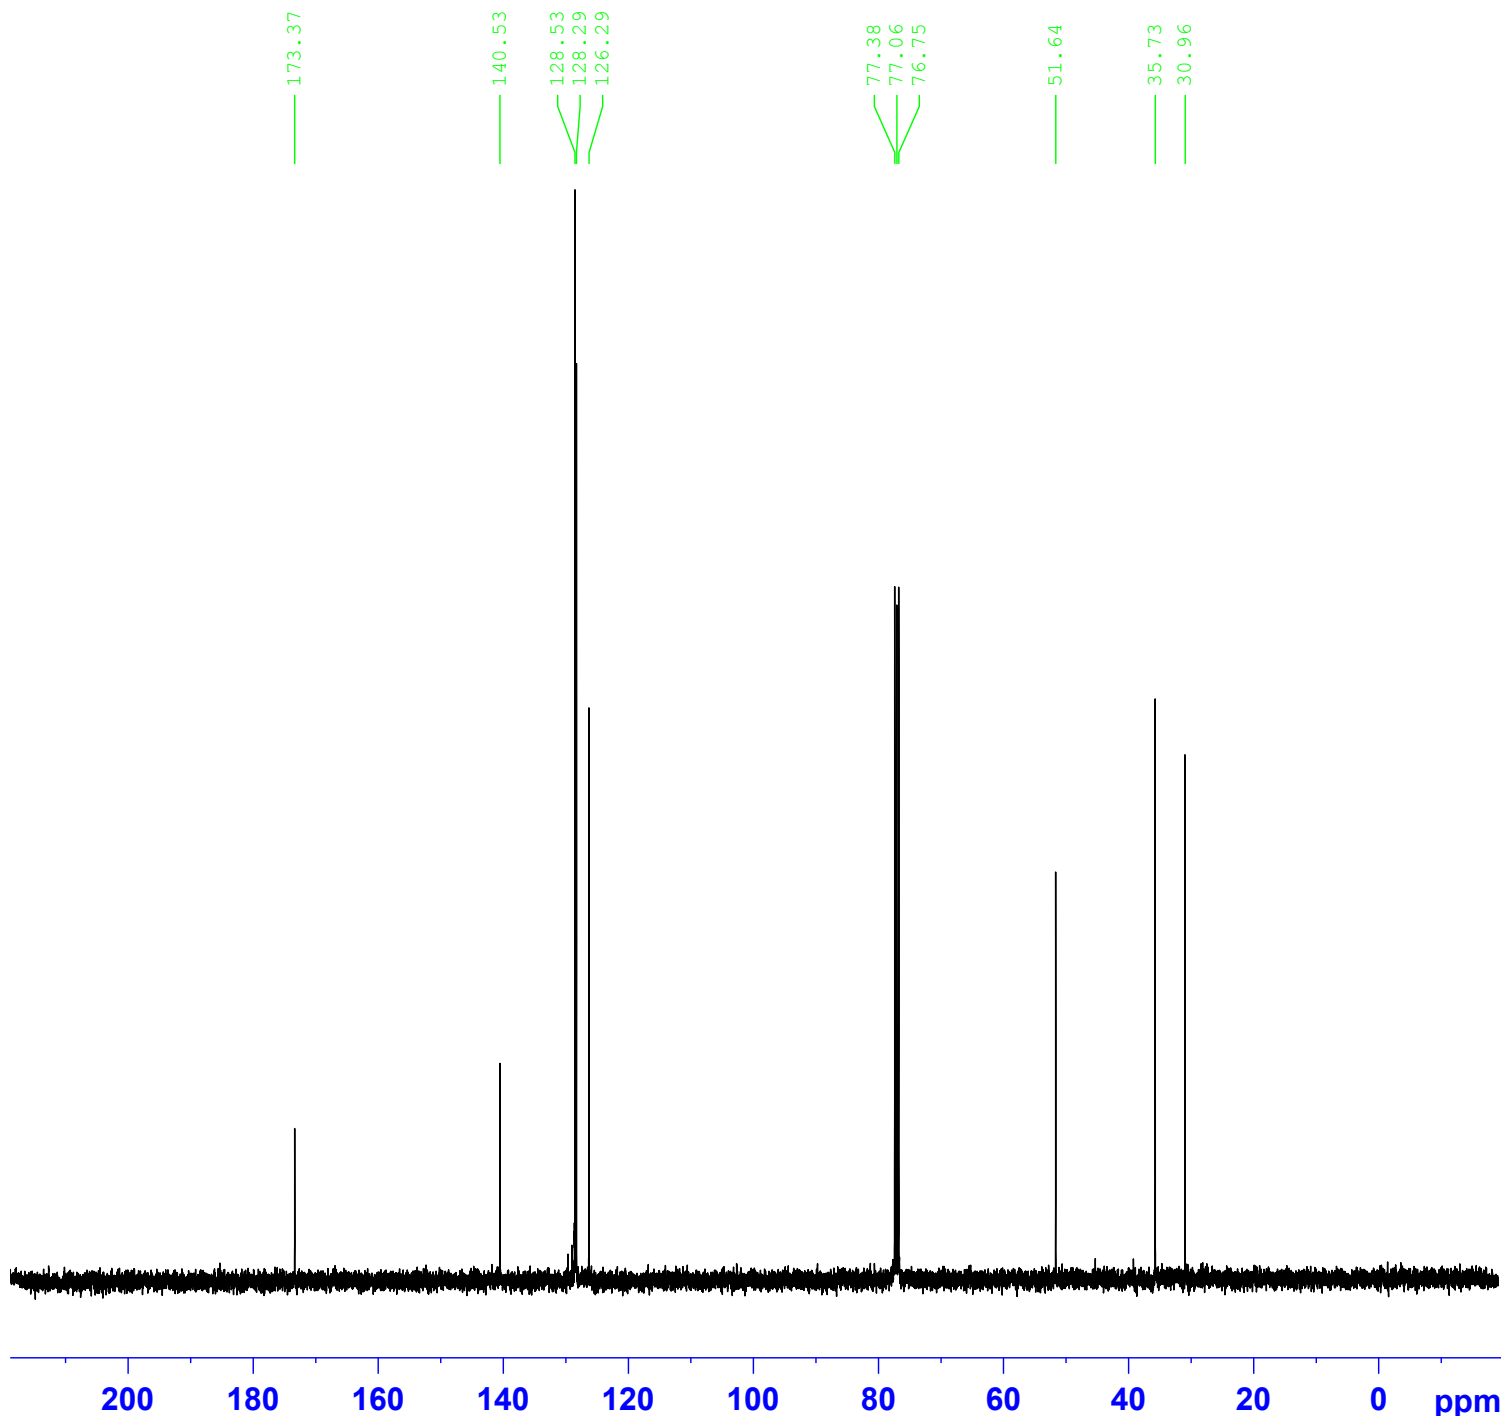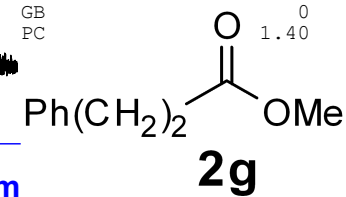

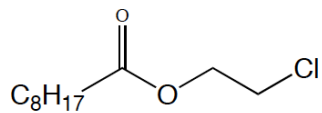

2h

4.361  
4.347  
4.333  
3.716  
3.703  
3.701  
3.687  
2.389  
2.370  
2.351  
1.692  
1.673  
1.655  
1.637  
1.618  
1.315  
1.304  
1.298  
1.288  
0.913  
0.897  
0.879



Current Data Parameters  
NAME TFish0641\_crude\_061010  
EXPNO 1  
PROCNO 1

F2 - Acquisition Parameters  
Date\_ 20100603  
Time\_ 11.23  
INSTRUM spect  
PROBHD 5 mm QNP 1H/13  
PULPROG zg30  
TD 65536  
SOLVENT CDC13  
NS 16  
DS 2  
SWH 8278.146 Hz  
FIDRES 0.126314 Hz  
AQ 3.9584243 sec  
RG 71.8  
DW 60.400 usec  
DE 6.50 usec  
TE 294.1 K  
D1 1.00000000 sec  
TD0 1

===== CHANNEL f1 =====  
NUC1 1H  
P1 10.25 usec  
PL1 -3.35 dB  
SFO1 400.1324710 MHz

F2 - Processing parameters  
SI 32768  
SF 400.130000 MHz  
WDW EM  
SSB 0  
LB 0.30 Hz  
GB 0  
PC 1.00

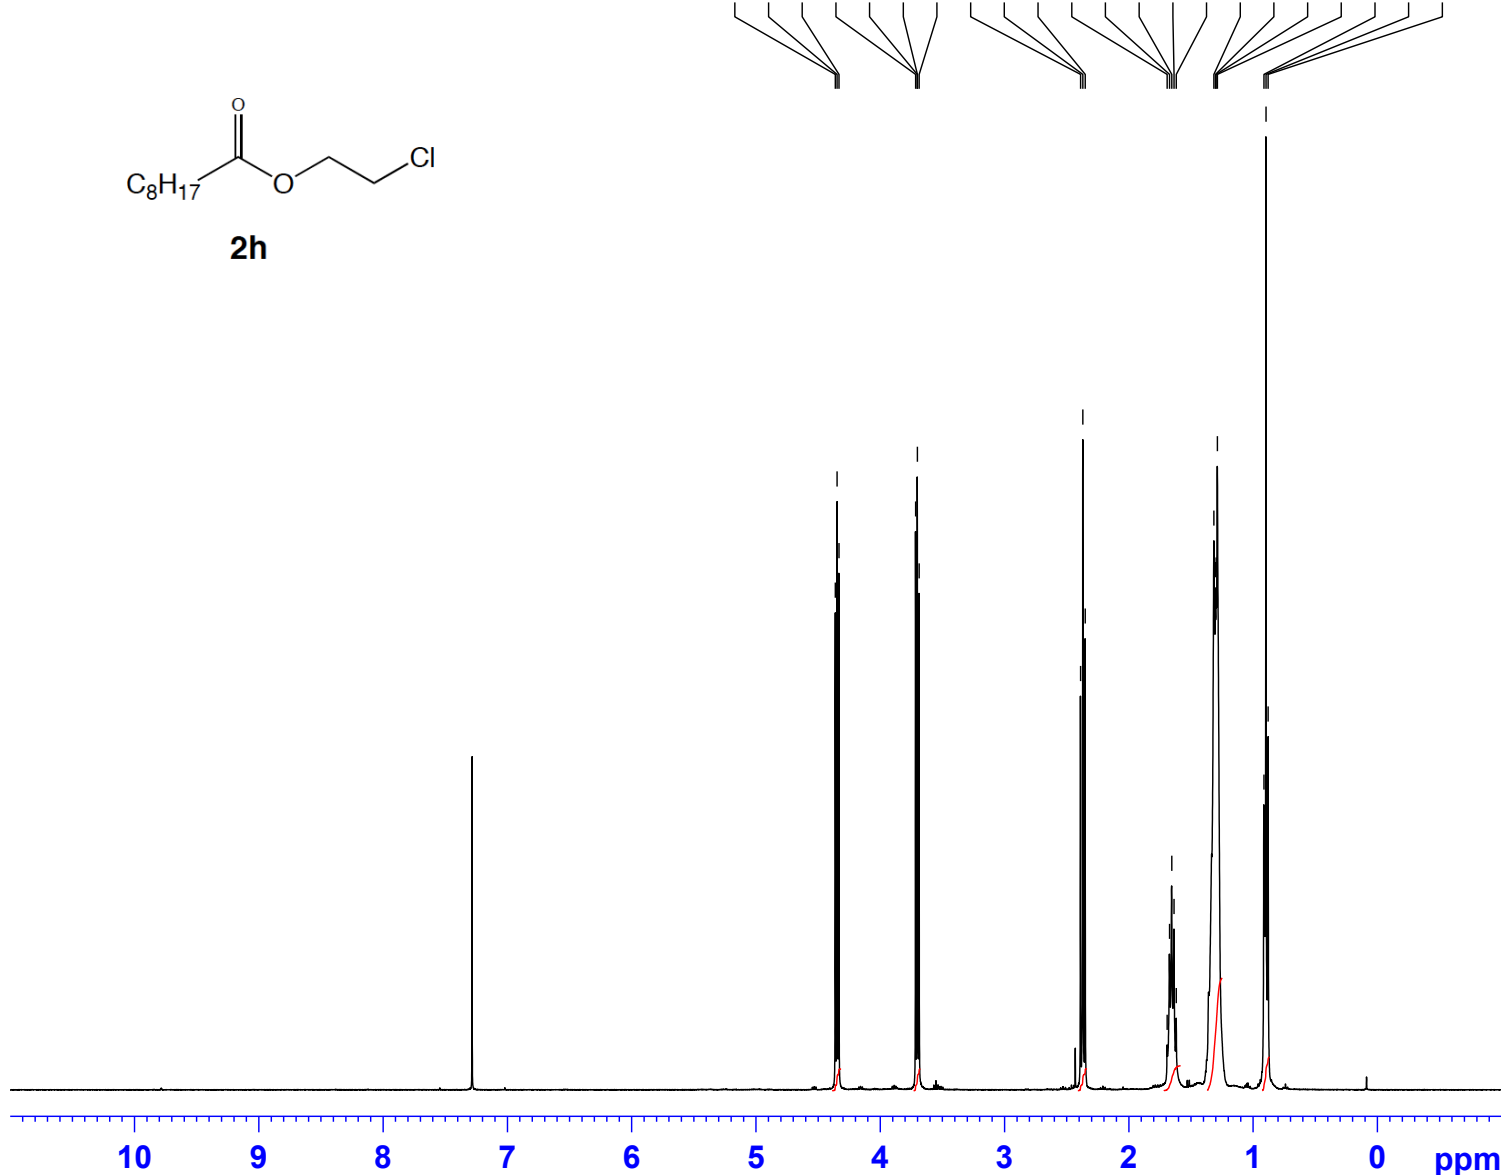

2.00  
2.00  
2.03  
2.30  
10.39  
3.09

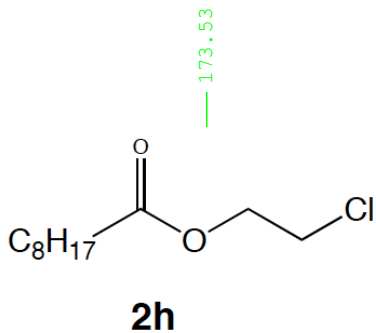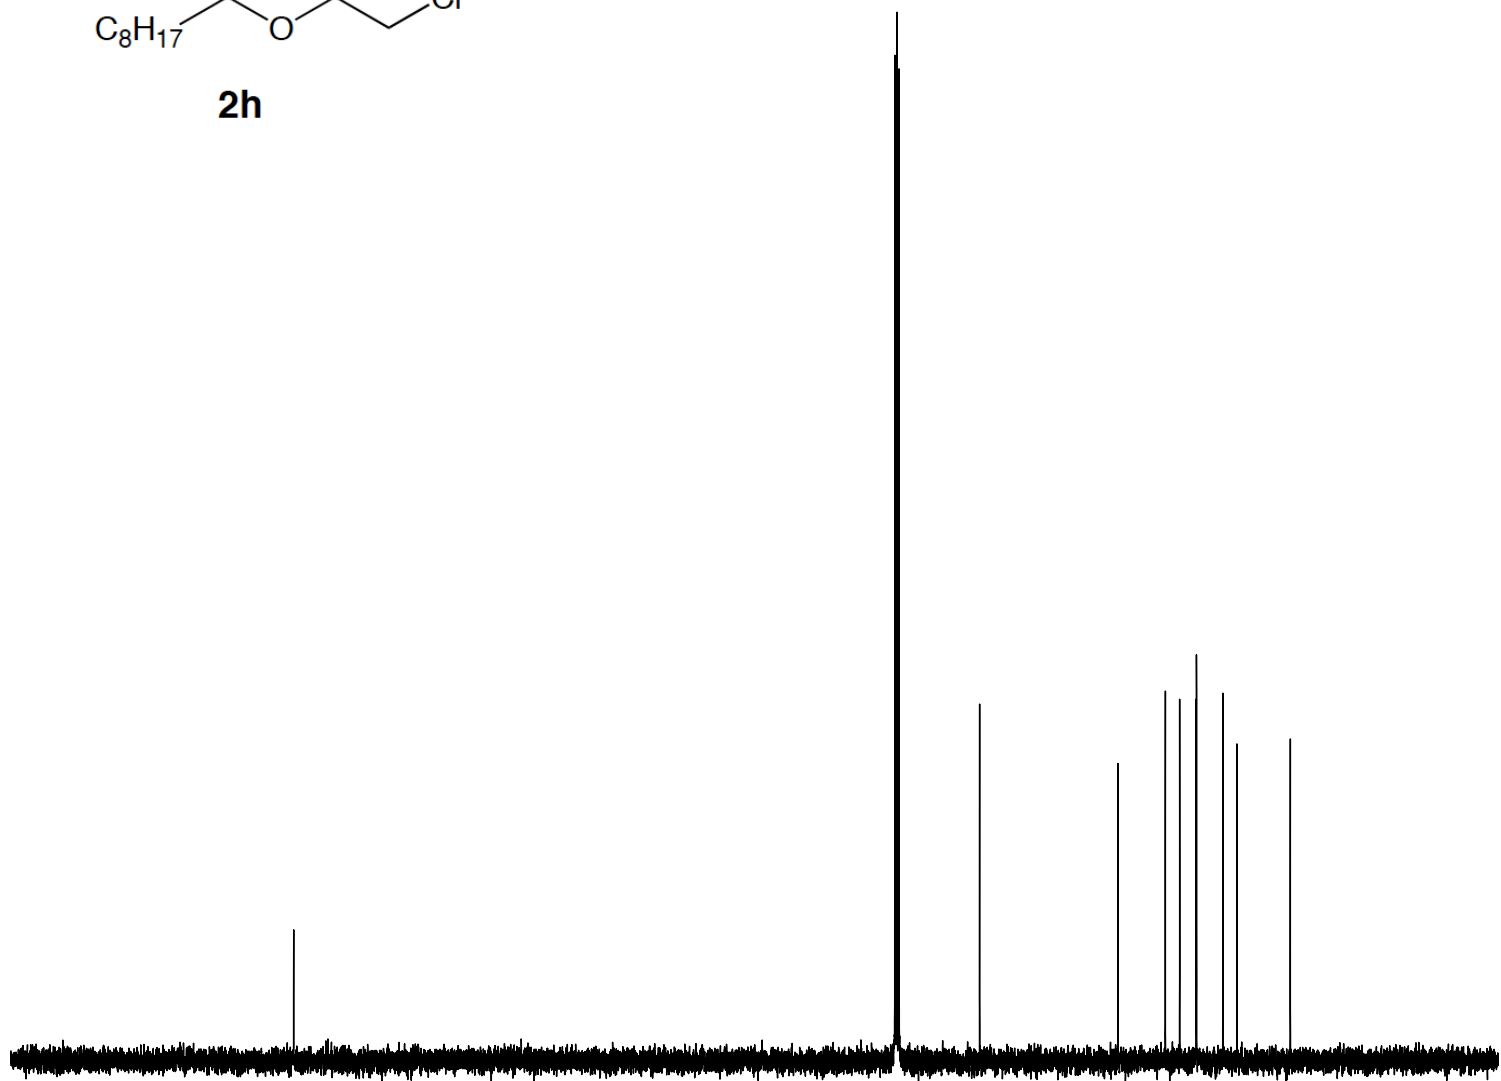

Current Data Parameters  
 NAME TFish0641\_crude\_061010  
 EXPNO 2  
 PROCNO 1

F2 - Acquisition Parameters  
 Date\_ 20100603  
 Time\_ 11.29  
 INSTRUM spect  
 PROBHD 5 mm QNP 1H/13  
 PULPROG zgpg30  
 TD 65536  
 SOLVENT CDC13  
 NS 153  
 DS 4  
 SWH 23980.814 Hz  
 FIDRES 0.365918 Hz  
 AQ 1.3664756 sec  
 RG 32768  
 DW 20.850 usec  
 DE 6.50 usec  
 TE 294.8 K  
 D1 2.00000000 sec  
 D11 0.03000000 sec  
 TD0 1

===== CHANNEL f1 =====  
 NUC1 13C  
 P1 10.00 usec  
 PL1 0.50 dB  
 SFO1 100.6228298 MHz

===== CHANNEL f2 =====  
 CPDPRG2 waltz16  
 NUC2 1H  
 PCPD2 70.00 usec  
 PL2 -3.35 dB  
 PL12 13.34 dB  
 PL13 13.34 dB  
 SFO2 400.1316005 MHz

F2 - Processing parameters  
 SI 32768  
 SF 100.6127690 MHz  
 WDW EM  
 SSB 0  
 LB 1.00 Hz  
 GB 0  
 PC 1.40

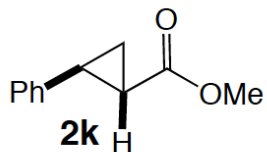

7.309  
7.230  
7.135

3.747  
2.584  
2.573  
2.567  
2.561  
2.557  
2.551  
2.545  
2.534  
1.961  
1.950  
1.948  
1.940  
1.937  
1.929  
1.927  
1.916  
1.660  
1.648  
1.647  
1.637  
1.636  
1.625  
1.624  
1.612  
1.381



Current Data Parameters  
 NAME TFish0530\_crude\_111409  
 EXPNO 1  
 PROCNO 1

F2 - Acquisition Parameters  
 Date\_ 20091114  
 Time\_ 19.41  
 INSTRUM spect  
 PROBHD 5 mm QNP 1H/13  
 PULPROG zg30  
 TD 65536  
 SOLVENT CDC13  
 NS 16  
 DS 2  
 SWH 8278.146 Hz  
 FIDRES 0.126314 Hz  
 AQ 3.9584243 sec  
 RG 90.5  
 DW 60.400 usec  
 DE 6.50 usec  
 TE 293.9 K  
 D1 1.00000000 sec  
 TD0 1

===== CHANNEL f1 =====  
 NUC1 1H  
 P1 12.00 usec  
 PL1 -3.35 dB  
 SFO1 400.1324710 MHz

F2 - Processing parameters  
 SI 32768  
 SF 400.130000 MHz  
 WDW EM  
 SSB 0  
 LB 0.30 Hz  
 GB 0  
 PC 1.00

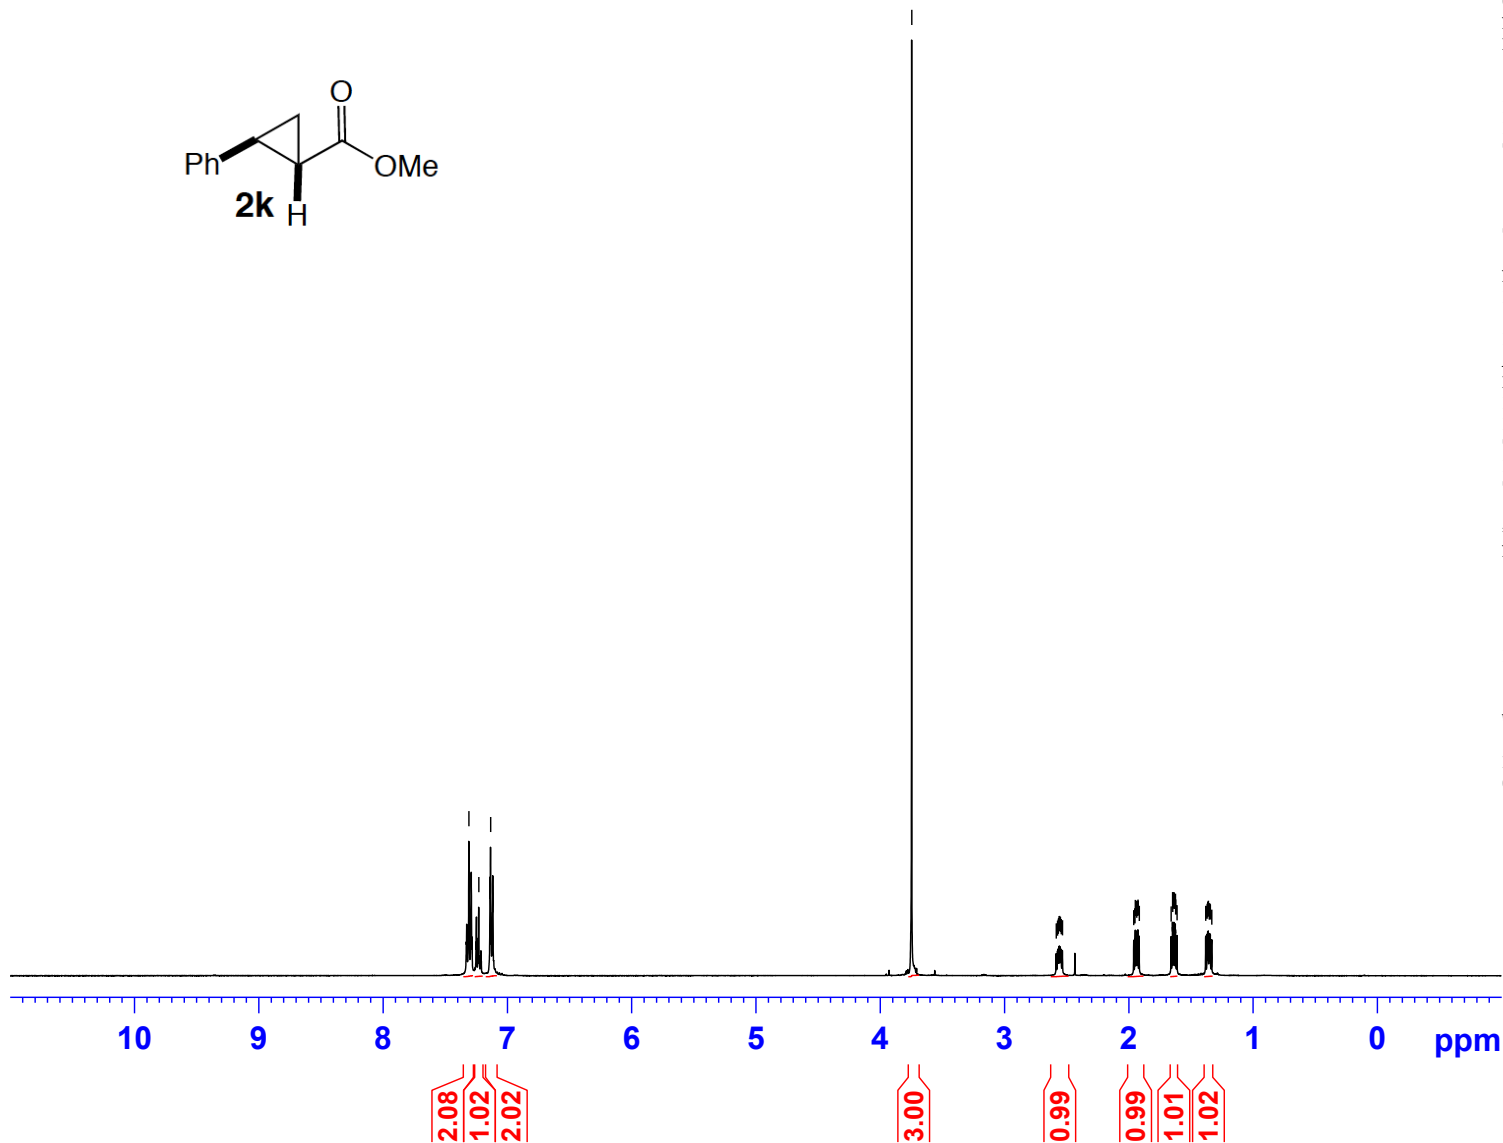

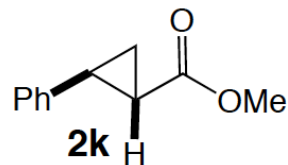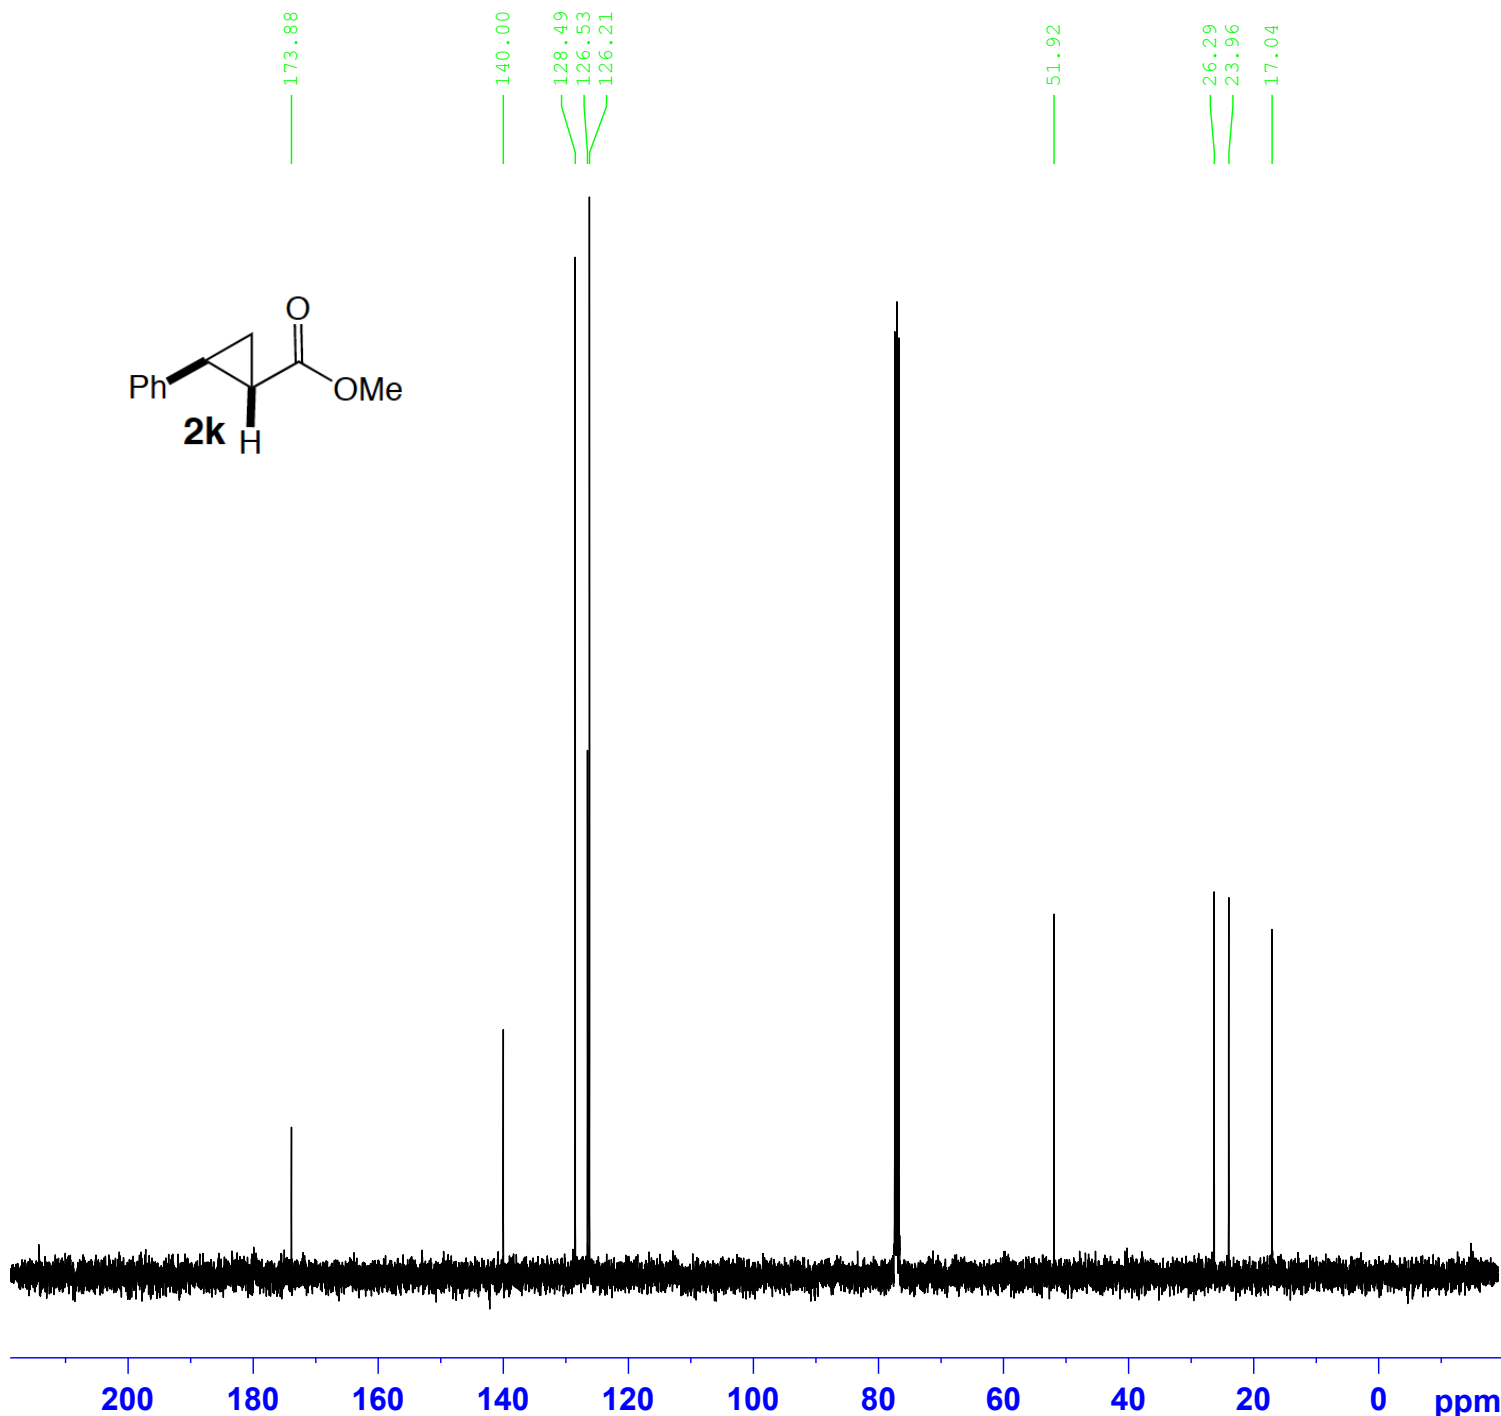

Current Data Parameters  
NAME TFish0530\_crude\_111409  
EXPNO 2  
PROCNO 1

F2 - Acquisition Parameters  
Date\_ 20091114  
Time 19.46  
INSTRUM spect  
PROBHD 5 mm QNP 1H/13  
PULPROG zgpg30  
TD 65536  
SOLVENT CDC13  
NS 112  
DS 4  
SWH 23980.814 Hz  
FIDRES 0.365918 Hz  
AQ 1.3664756 sec  
RG 1024  
DW 20.850 usec  
DE 6.50 usec  
TE 295.0 K  
D1 2.00000000 sec  
D11 0.03000000 sec  
TD0 1

==== CHANNEL f1 =====  
NUC1 13C  
P1 10.00 usec  
PL1 0.50 dB  
SFO1 100.6228298 MHz

==== CHANNEL f2 =====  
CPDPRG2 waltz16  
NUC2 1H  
PCPD2 70.00 usec  
PL2 -3.35 dB  
PL12 11.97 dB  
PL13 11.97 dB  
SFO2 400.1316005 MHz

F2 - Processing parameters  
SI 32768  
SF 100.6127690 MHz  
WDW EM  
SSB 0  
LB 1.00 Hz  
GB 0  
PC 1.40

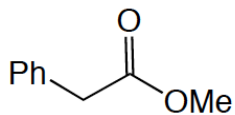

2l

7.325

3.724  
3.666



Current Data Parameters  
NAME TFish0515\_crude\_091409  
EXPNO 1  
PROCNO 1

F2 - Acquisition Parameters

Date\_ 20090914  
Time\_ 14.20  
INSTRUM spect  
PROBHD 5 mm QNP 1H/13  
PULPROG zg30  
TD 65536  
SOLVENT CDC13  
NS 16  
DS 2  
SWH 8278.146 Hz  
FIDRES 0.126314 Hz  
AQ 3.9584243 sec  
RG 71.8  
DW 60.400 usec  
DE 6.50 usec  
TE 293.9 K  
D1 1.00000000 sec  
TD0 1

===== CHANNEL f1 =====

NUC1 1H  
P1 12.00 usec  
PL1 -3.35 dB  
SFO1 400.1324710 MHz

F2 - Processing parameters

SI 32768  
SF 400.130000 MHz  
WDW EM  
SSB 0  
LB 0.30 Hz  
GB 0  
PC 1.00

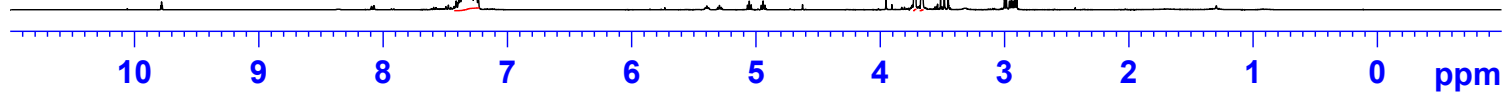

6.64

3.00  
1.98



Current Data Parameters  
NAME TFish0515\_crude\_091409  
EXPNO 2  
PROCNO 1

F2 - Acquisition Parameters  
Date\_ 20090914  
Time 14.23  
INSTRUM spect  
PROBHD 5 mm QNP 1H/13  
PULPROG zgpg30  
TD 65536  
SOLVENT CDC13  
NS 54  
DS 4  
SWH 23980.814 Hz  
FIDRES 0.365918 Hz  
AQ 1.3664756 sec  
RG 812.7  
DW 20.850 usec  
DE 6.50 usec  
TE 294.5 K  
D1 2.00000000 sec  
D11 0.03000000 sec  
TD0 1

==== CHANNEL f1 =====  
NUC1 13C  
P1 10.00 usec  
PL1 0.00 dB  
SFO1 100.6228298 MHz

==== CHANNEL f2 =====  
CPDPRG2 waltz16  
NUC2 1H  
PCPD2 70.00 usec  
PL2 -3.35 dB  
PL12 11.97 dB  
PL13 11.97 dB  
SFO2 400.1316005 MHz

F2 - Processing parameters  
SI 32768  
SF 100.6127690 MHz  
WDW EM  
SSB 0  
LB 1.00 Hz  
GB 0  
PC 1.40

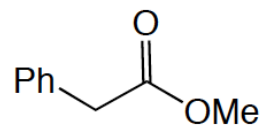

2l

172.08

134.00  
129.70  
129.53  
129.48  
129.28  
128.61  
128.49  
128.40  
127.14  
126.79

52.08

41.22

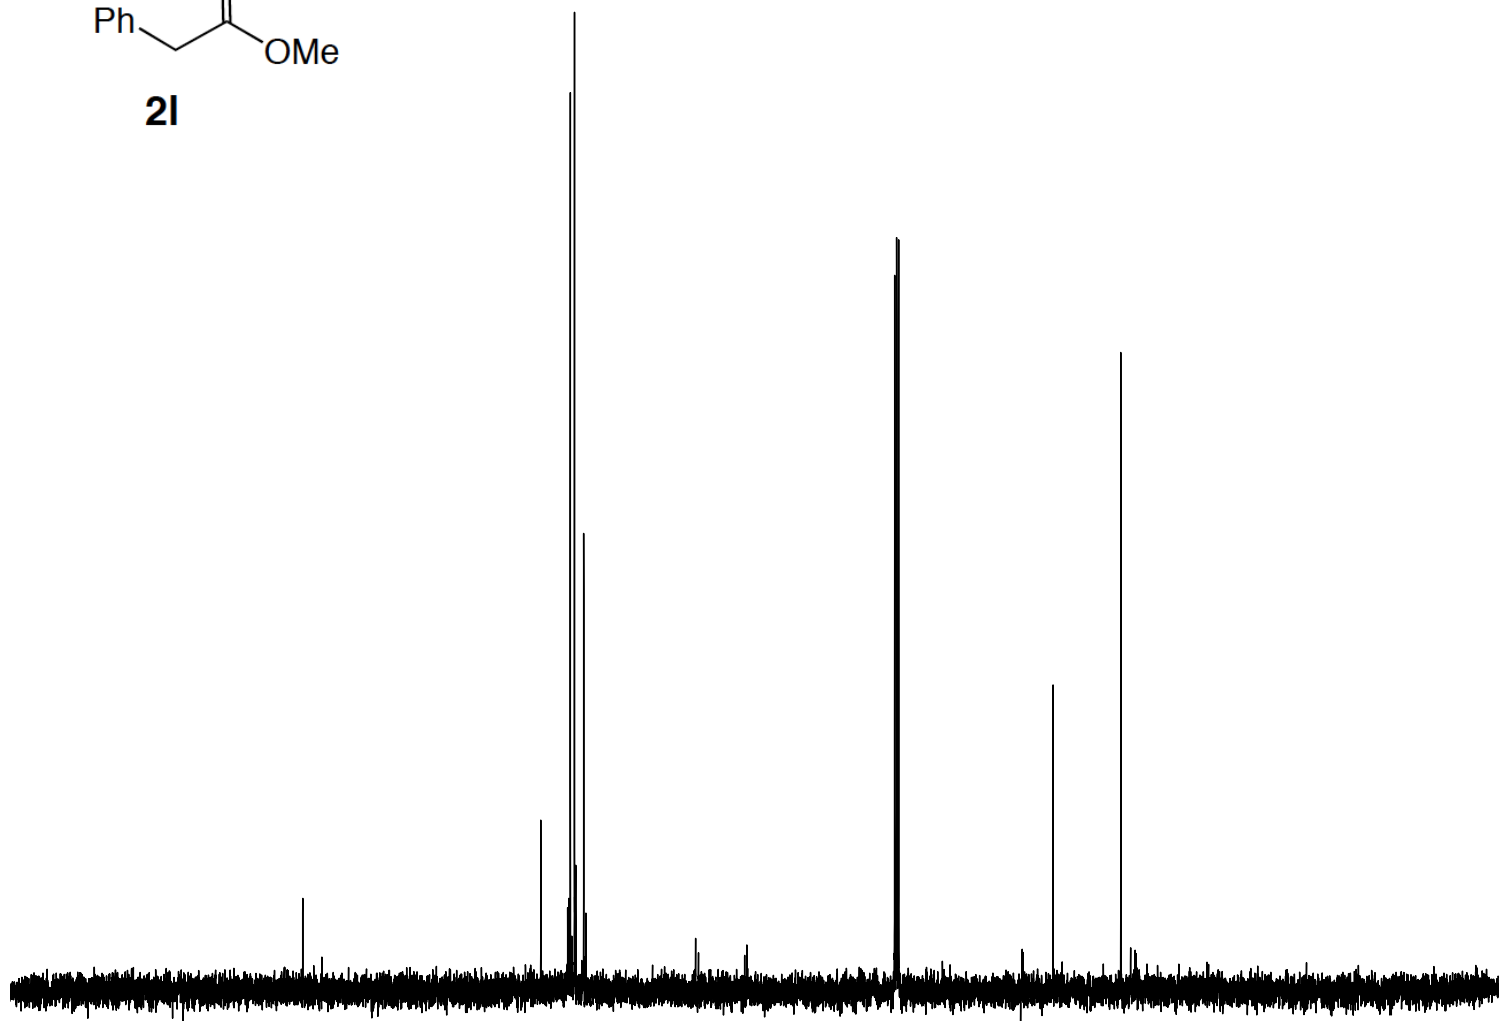

200 180 160 140 120 100 80 60 40 20 0 ppm



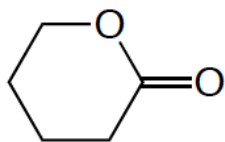

2m

4.321  
4.301  
4.282  
2.533  
2.510  
2.487  
1.916  
1.898  
1.892  
1.873  
1.853  
1.843  
1.836  
1.818  
1.802  
1.798  
1.790



Current Data Parameters  
NAME TFish0593\_crude\_031810  
EXPNO 1  
PROCNO 1

F2 - Acquisition Parameters  
Date\_ 20100318  
Time 18.45  
INSTRUM spect  
PROBHD 5 mm QNP 1H/13  
PULPROG zg30  
TD 65536  
SOLVENT CDC13  
NS 16  
DS 2  
SWH 6172.839 Hz  
FIDRES 0.094190 Hz  
AQ 5.3084660 sec  
RG 114  
DW 81.000 usec  
DE 6.50 usec  
TE 298.0 K  
D1 1.00000000 sec  
TD0 1

===== CHANNEL f1 =====  
NUC1 1H  
P1 9.00 usec  
PL1 0.60 dB  
SFO1 300.1318534 MHz

F2 - Processing parameters  
SI 65536  
SF 300.130000 MHz  
WDW EM  
SSB 0  
LB 0.30 Hz  
GB 0  
PC 1.00

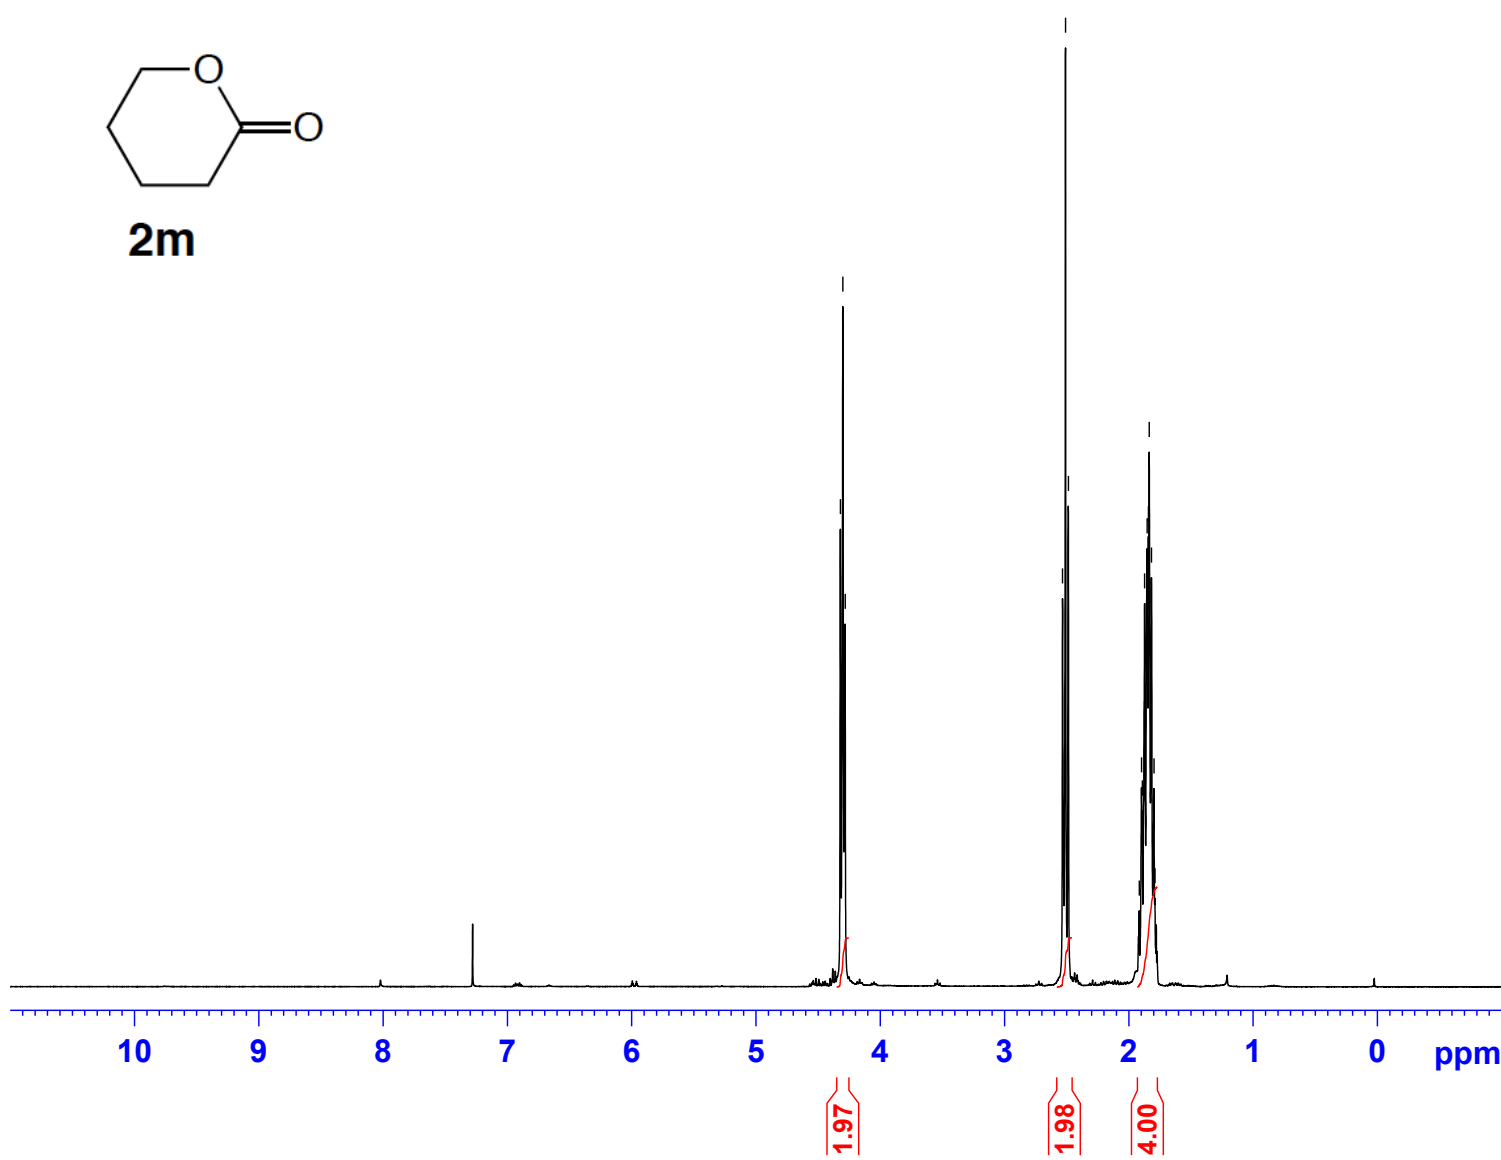

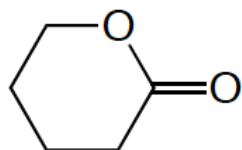

2m

171.39

69.43

29.80

22.27

19.05

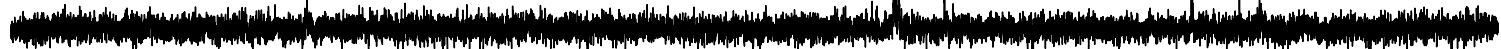

200 180 160 140 120 100 80 60 40 20 0 ppm

50/52

Current Data Parameters  
NAME TFish0593\_crude\_031810  
EXPNO 2  
PROCNO 1

F2 - Acquisition Parameters  
Date\_ 20100318  
Time 18.48  
INSTRUM spect  
PROBHD 5 mm QNP 1H/13  
PULPROG zgpg30  
TD 32768  
SOLVENT CDC13  
NS 46  
DS 4  
SWH 17985.611 Hz  
FIDRES 0.548877 Hz  
AQ 0.9110004 sec  
RG 13004  
DW 27.800 usec  
DE 6.50 usec  
TE 298.0 K  
D1 2.00000000 sec  
D11 0.03000000 sec  
TD0 1

==== CHANNEL f1 =====  
NUC1 13C  
P1 6.25 usec  
PL1 0.00 dB  
SFO1 75.4752953 MHz

==== CHANNEL f2 =====  
CPDPRG2 waltz16  
NUC2 1H  
PCPD2 70.00 usec  
PL2 0.60 dB  
PL12 18.42 dB  
PL13 18.42 dB  
SFO2 300.1312005 MHz

F2 - Processing parameters  
SI 32768  
SF 75.4677490 MHz  
WDW EM  
SSB 0  
LB 1.00 Hz  
GB 0  
PC 1.40

3.692  
3.595  
3.580  
3.574  
3.568  
3.559  
3.549  
3.530  
3.522  
2.436  
2.422  
2.412  
2.397  
2.372  
2.356  
2.348  
2.332  
2.000  
1.998  
1.992  
1.982  
1.980  
1.974  
1.964  
1.903  
1.893  
1.884  
1.877  
1.868  
1.565  
1.546  
1.529  
1.510  
1.386  
1.383  
1.378  
1.366  
1.363  
1.129  
1.120  
1.112  
1.102  
1.093  
0.910

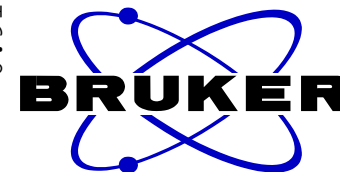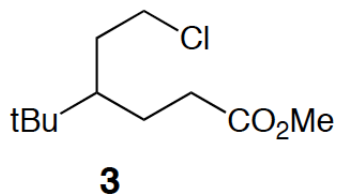

Current Data Parameters  
 NAME TFish0589\_10-17\_031510  
 EXPNO 1  
 PROCNO 1

F2 - Acquisition Parameters  
 Date\_ 20100315  
 Time\_ 20.08  
 INSTRUM spect  
 PROBHD 5 mm QNP 1H/13  
 PULPROG zg30  
 TD 65536  
 SOLVENT CDC13  
 NS 16  
 DS 2  
 SWH 8278.146 Hz  
 FIDRES 0.126314 Hz  
 AQ 3.9584243 sec  
 RG 64  
 DW 60.400 usec  
 DE 6.50 usec  
 TE 298.0 K  
 D1 1.00000000 sec  
 TD0 1

===== CHANNEL f1 =====  
 NUC1 1H  
 P1 10.25 usec  
 PL1 -3.35 dB  
 SFO1 400.1324710 MHz

F2 - Processing parameters  
 SI 32768  
 SF 400.130000 MHz  
 WDW EM  
 SSB 0  
 LB 0.30 Hz  
 GB 0  
 PC 1.00

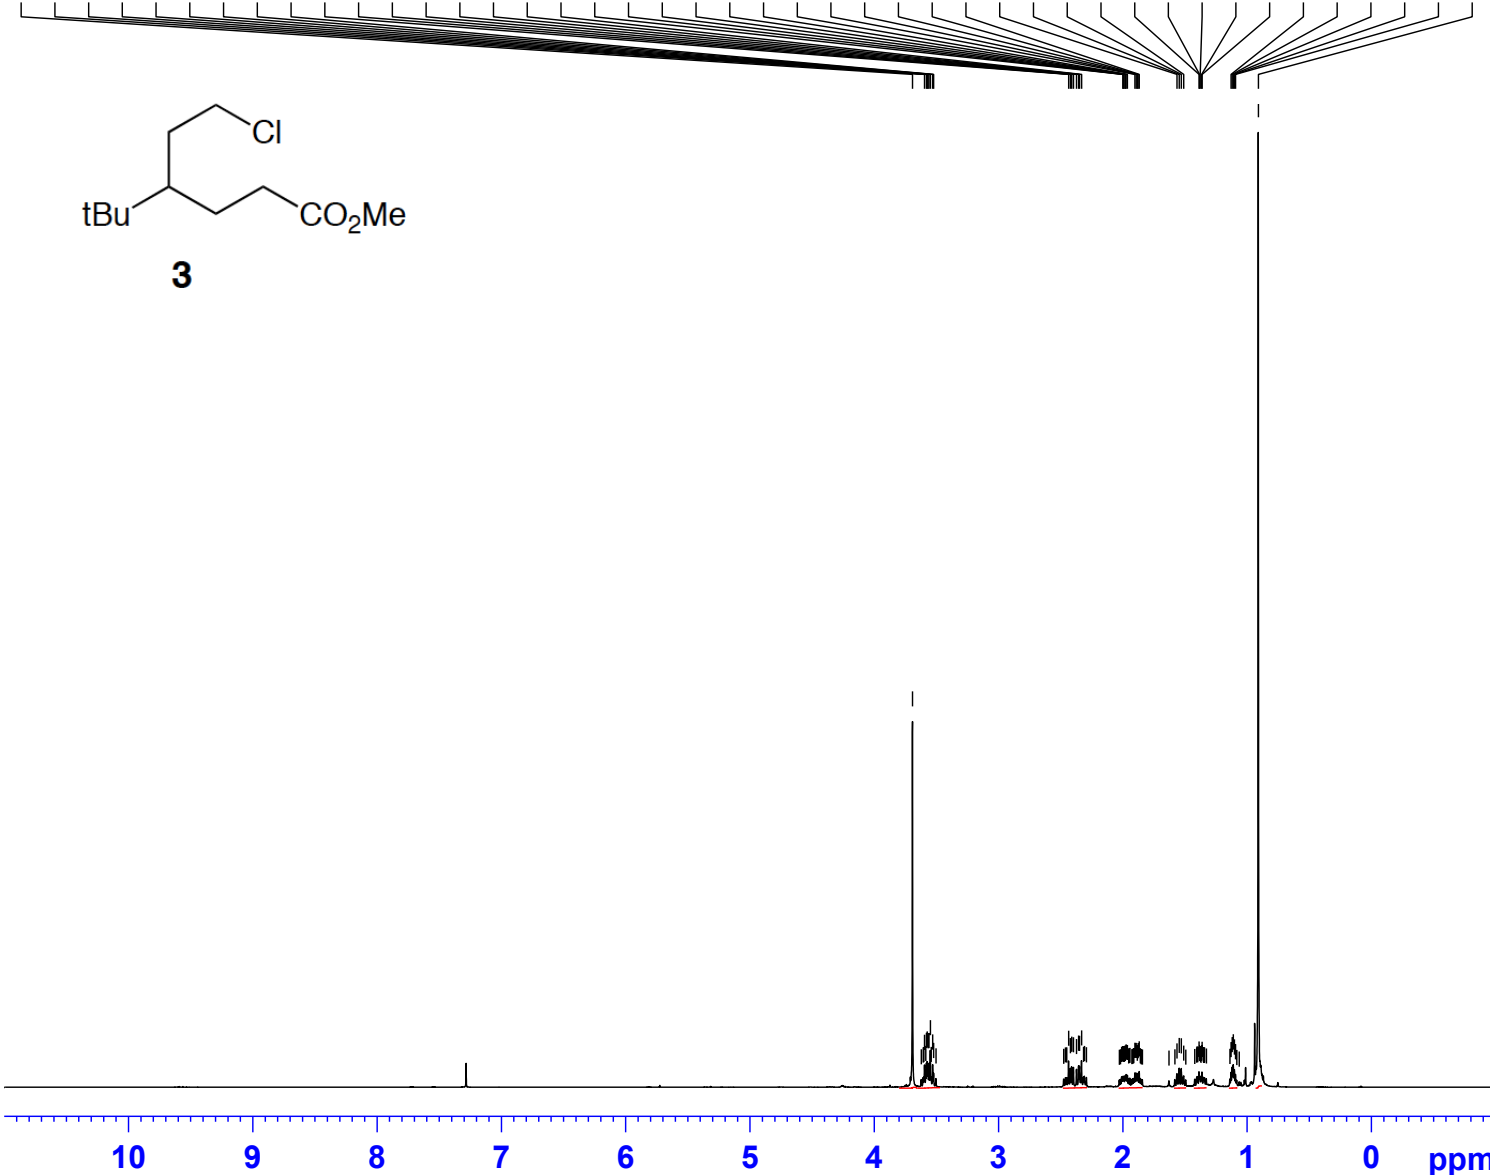

3.00  
2.01  
2.11  
2.12  
1.03  
1.13  
1.04  
8.99

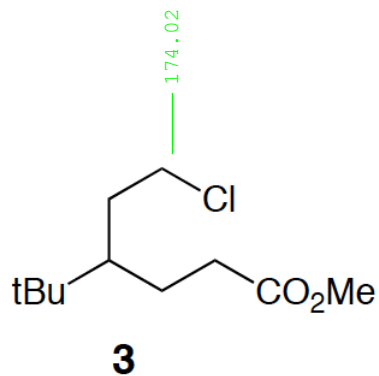

51.56  
45.56  
44.83  
34.53  
33.94  
33.88  
27.51  
26.29



Current Data Parameters  
 NAME TFish0589\_10-17\_031510  
 EXPNO 2  
 PROCNO 1

F2 - Acquisition Parameters  
 Date\_ 20100315  
 Time 20.13  
 INSTRUM spect  
 PROBHD 5 mm QNP 1H/13  
 PULPROG zgpg30  
 TD 65536  
 SOLVENT CDC13  
 NS 58  
 DS 4  
 SWH 23980.814 Hz  
 FIDRES 0.365918 Hz  
 AQ 1.3664756 sec  
 RG 812.7  
 DW 20.850 usec  
 DE 6.50 usec  
 TE 298.0 K  
 D1 2.00000000 sec  
 D11 0.03000000 sec  
 TD0 1

==== CHANNEL f1 =====  
 NUC1 13C  
 P1 10.00 usec  
 PL1 0.50 dB  
 SFO1 100.6228298 MHz

==== CHANNEL f2 =====  
 CPDPRG2 waltz16  
 NUC2 1H  
 PCPD2 70.00 usec  
 PL2 -3.35 dB  
 PL12 13.34 dB  
 PL13 13.34 dB  
 SFO2 400.1316005 MHz

F2 - Processing parameters  
 SI 32768  
 SF 100.6127690 MHz  
 WDW EM  
 SSB 0  
 LB 1.00 Hz  
 GB 0  
 PC 1.40

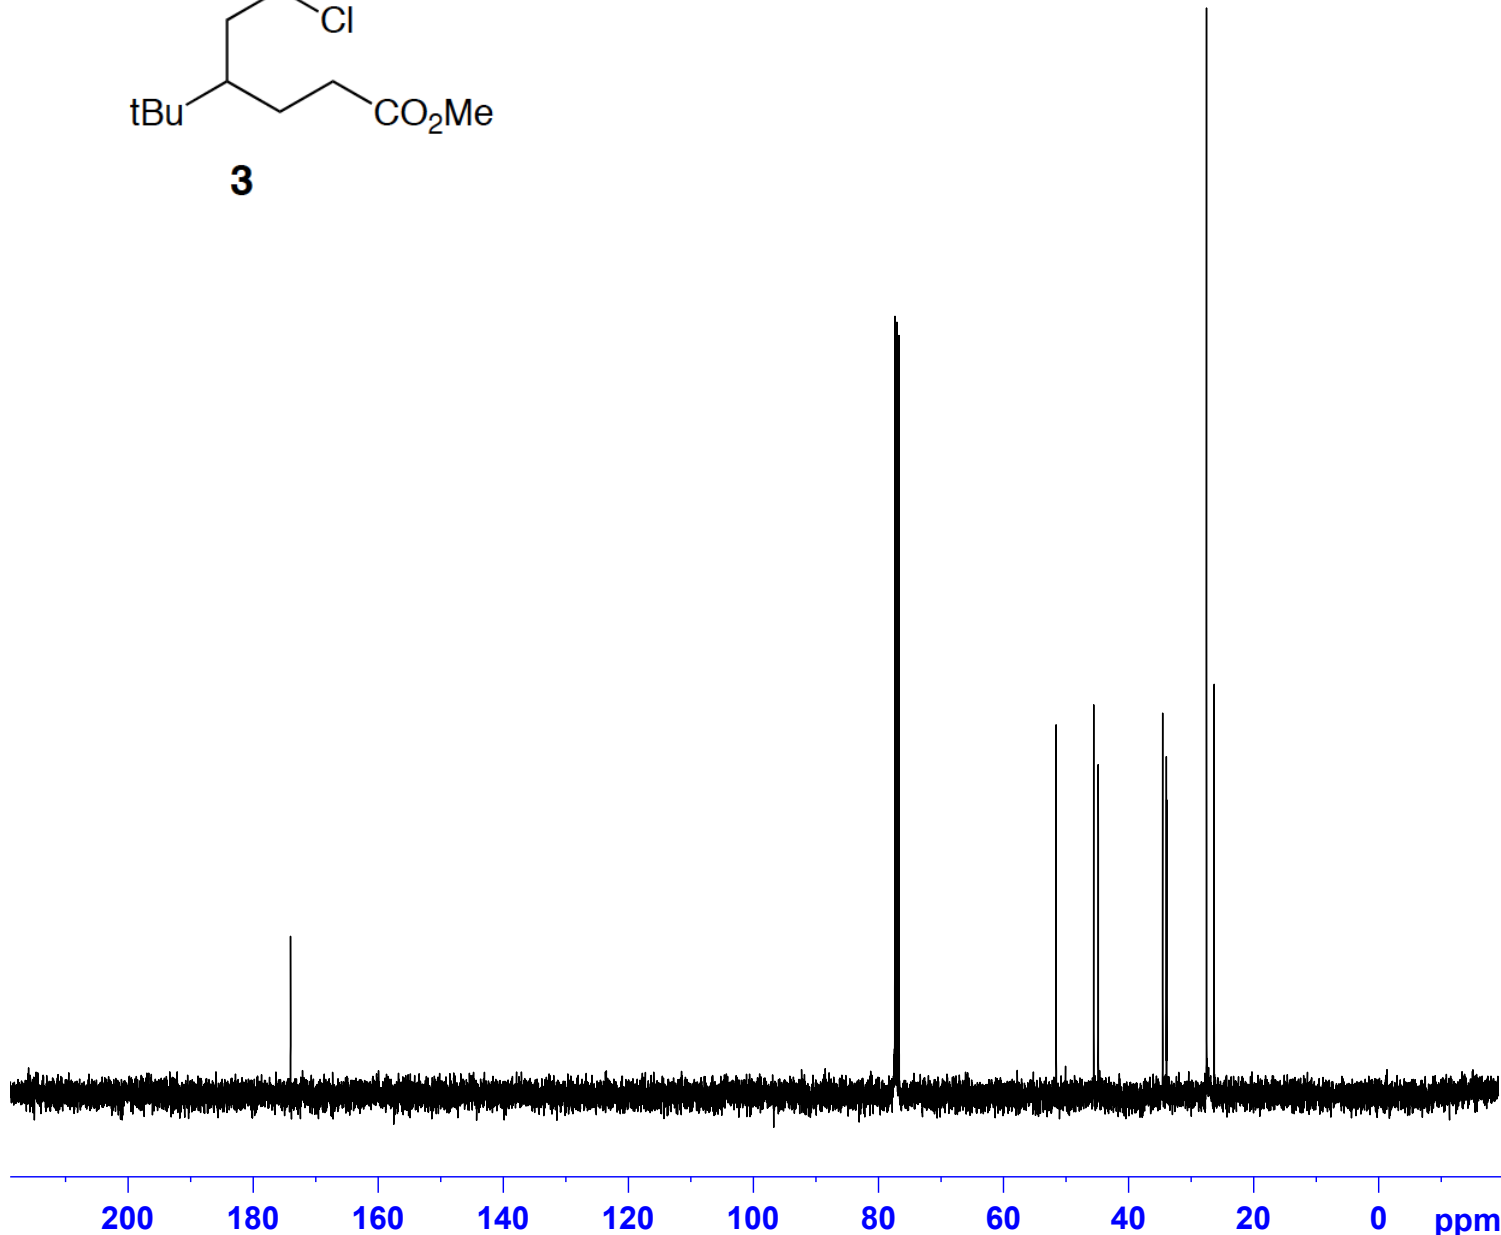

Supplement: NIHMS231871-supplement-01.pdf [file NIHMS231871-supplement-01.pdf]
